# Supplementary material for: Predictors of mortality in patients with coronavirus disease 2019: a systematic review and meta-analysis
Source: Springer Nature journal article supplement (doi:10.1186/s12879-021-06369-0), 2021-07-08
Supplement: 12879_2021_6369_MOESM2_ESM.pdf [file 12879_2021_6369_MOESM2_ESM.pdf]

## Supplemental file

### ***Title: Predictors of mortality in patients with coronavirus disease 2019: a systematic review and meta-analysis***

## CONTENTS

|                              |   |
|------------------------------|---|
| Notes and Abbreviations..... | 7 |
|------------------------------|---|

### **TABLES**

|                                                             |   |
|-------------------------------------------------------------|---|
| Table S1. Quality Assessments of the Included Studies ..... | 8 |
|-------------------------------------------------------------|---|

#### **Demographic Factors**

|                                                               |   |
|---------------------------------------------------------------|---|
| Table S2. Data of Age between Nonsurvivors and Survivors..... | 9 |
|---------------------------------------------------------------|---|

|                                                                        |   |
|------------------------------------------------------------------------|---|
| Table S3. Data of Association between Advanced Age and Mortality ..... | 9 |
|------------------------------------------------------------------------|---|

|                                                                   |   |
|-------------------------------------------------------------------|---|
| Table S4. Data of Association between Male Sex and Mortality..... | 9 |
|-------------------------------------------------------------------|---|

|                                                                           |    |
|---------------------------------------------------------------------------|----|
| Table S5. Data of Association between Current Smoking and Mortality ..... | 10 |
|---------------------------------------------------------------------------|----|

#### **Comorbid Conditions**

|                                                                                       |    |
|---------------------------------------------------------------------------------------|----|
| Table S6. Data of Association between Preexisting Any Comorbidity and Mortality ..... | 10 |
|---------------------------------------------------------------------------------------|----|

|                                                                                              |    |
|----------------------------------------------------------------------------------------------|----|
| Table S7. Data of Association between Preexisting Chronic Kidney Disease and Mortality ..... | 10 |
|----------------------------------------------------------------------------------------------|----|

|                                                                                  |    |
|----------------------------------------------------------------------------------|----|
| Table S8. Data of Association between Cerebrovascular Disease and Mortality..... | 10 |
|----------------------------------------------------------------------------------|----|

|                                                                                                  |    |
|--------------------------------------------------------------------------------------------------|----|
| Table S9. Data of Association between Preexisting Chronic Respiratory Disease and Mortality..... | 10 |
|--------------------------------------------------------------------------------------------------|----|

|                                                                                               |    |
|-----------------------------------------------------------------------------------------------|----|
| Table S10. Data of Association between Preexisting Cardiovascular Disease and Mortality ..... | 11 |
|-----------------------------------------------------------------------------------------------|----|

|                                                                                          |    |
|------------------------------------------------------------------------------------------|----|
| Table S11. Data of Association between Preexisting Diabetes Mellitus and Mortality ..... | 11 |
|------------------------------------------------------------------------------------------|----|

|                                                                                    |    |
|------------------------------------------------------------------------------------|----|
| Table S12. Data of Association between Preexisting Hypertension and Mortality..... | 11 |
|------------------------------------------------------------------------------------|----|

|                                                                                   |    |
|-----------------------------------------------------------------------------------|----|
| Table S13. Data of Association between Preexisting Malignancy and Mortality ..... | 11 |
|-----------------------------------------------------------------------------------|----|

|                                                                                                 |    |
|-------------------------------------------------------------------------------------------------|----|
| Table S14. Data of Association between Preexisting Gastrointestinal Disease and Mortality ..... | 11 |
|-------------------------------------------------------------------------------------------------|----|

|                                                                                              |    |
|----------------------------------------------------------------------------------------------|----|
| Table S15. Data of Association between Preexisting Chronic Liver Disease and Mortality ..... | 12 |
|----------------------------------------------------------------------------------------------|----|

|                                                                                          |    |
|------------------------------------------------------------------------------------------|----|
| Table S16. Data of Association between Preexisting Autoimmune Disease and Mortality..... | 12 |
|------------------------------------------------------------------------------------------|----|

#### **Clinical Symptoms**

|                                                                             |    |
|-----------------------------------------------------------------------------|----|
| Table S17. Data of Association between Symptoms of Fever and Mortality..... | 12 |
|-----------------------------------------------------------------------------|----|

|                                                                              |    |
|------------------------------------------------------------------------------|----|
| Table S18. Data of Association between Symptoms of Cough and Mortality ..... | 12 |
|------------------------------------------------------------------------------|----|

|                                                                               |    |
|-------------------------------------------------------------------------------|----|
| Table S19. Data of Association between Symptoms of Dyspnea and Mortality..... | 12 |
|-------------------------------------------------------------------------------|----|

|                                                                                        |    |
|----------------------------------------------------------------------------------------|----|
| Table S20. Data of Association between Symptoms of Chest Tightness and Mortality ..... | 13 |
|----------------------------------------------------------------------------------------|----|

|                                                                                         |    |
|-----------------------------------------------------------------------------------------|----|
| Table S21. Data of Association between Symptoms of Sputum Production and Mortality..... | 13 |
|-----------------------------------------------------------------------------------------|----|

|                                                                               |    |
|-------------------------------------------------------------------------------|----|
| Table S22. Data of Association between Symptoms of Fatigue and Mortality..... | 13 |
|-------------------------------------------------------------------------------|----|

|                                                                                |    |
|--------------------------------------------------------------------------------|----|
| Table S23. Data of Association between Symptoms of Anorexia and Mortality..... | 13 |
|--------------------------------------------------------------------------------|----|

|                                                                                |    |
|--------------------------------------------------------------------------------|----|
| Table S24. Data of Association between Symptoms of Diarrhea and Mortality..... | 13 |
|--------------------------------------------------------------------------------|----|

|                                                                                |    |
|--------------------------------------------------------------------------------|----|
| Table S25. Data of Association between Symptoms of Myalgia and Mortality ..... | 13 |
|--------------------------------------------------------------------------------|----|

|                                                                                  |    |
|----------------------------------------------------------------------------------|----|
| Table S26. Data of Association between Symptoms of Dizziness and Mortality ..... | 14 |
|----------------------------------------------------------------------------------|----|

|                                                                               |    |
|-------------------------------------------------------------------------------|----|
| Table S27. Data of Association between Symptoms of Nausea and Mortality ..... | 14 |
|-------------------------------------------------------------------------------|----|

|                                                                                |    |
|--------------------------------------------------------------------------------|----|
| Table S28. Data of Association between Symptoms of Headache and Mortality..... | 14 |
|--------------------------------------------------------------------------------|----|

|                                                                                 |    |
|---------------------------------------------------------------------------------|----|
| Table S29. Data of Association between Symptoms of Vomiting and Mortality ..... | 14 |
|---------------------------------------------------------------------------------|----|

|                                                                                    |    |
|------------------------------------------------------------------------------------|----|
| Table S30. Data of Association between Symptoms of Pharyngalgia and Mortality..... | 14 |
|------------------------------------------------------------------------------------|----|

|                                                                                  |    |
|----------------------------------------------------------------------------------|----|
| Table S31. Data of Association between Symptoms of Hemoptysis and Mortality..... | 14 |
|----------------------------------------------------------------------------------|----|

## Complications

|                                                                                                |    |
|------------------------------------------------------------------------------------------------|----|
| Table S32. Data of Association between Shock and Mortality .....                               | 15 |
| Table S33. Data of Association between Acute Infection and Mortality .....                     | 15 |
| Table S34. Data of Association between Acute Kidney Injury and Mortality .....                 | 15 |
| Table S35. Data of Association between Acute Cardiac Injury and Mortality .....                | 15 |
| Table S36. Data of Association between Acute Respiratory Distress Syndrome and Mortality ..... | 15 |
| Table S37. Data of Association between Arrhythmia and Mortality .....                          | 16 |
| Table S38. Data of Association between Heart Failure and Mortality.....                        | 16 |
| Table S39. Data of Association between Acute Liver Injury and Mortality .....                  | 16 |
| Table S40. Data of Association between Sepsis and Mortality.....                               | 16 |

## Supportive Therapy

|                                                                                            |    |
|--------------------------------------------------------------------------------------------|----|
| Table S41. Data of Association between Renal Replacement Therapy and Mortality.....        | 16 |
| Table S42. Data of Association between Invasive Mechanical Ventilation and Mortality ..... | 16 |
| Table S43. Data of Association between Noninvasive Ventilation and Mortality .....         | 17 |
| Table S44. Data of Association between High Flow Nasal Cannula and Mortality.....          | 17 |
| Table S45. Data of Association between ECMO and Mortality .....                            | 17 |

## Therapeutic Predictors

|                                                                                   |    |
|-----------------------------------------------------------------------------------|----|
| Table S46. Data of Association between Corticosteroid Therapy and Mortality ..... | 17 |
| Table S47. Data of Association between Antibiotic Therapy and Mortality.....      | 17 |
| Table S48. Data of Association between Immunoglobulin Therapy and Mortality ..... | 18 |
| Table S49. Data of Association between Antiviral Therapy and Mortality .....      | 18 |

## Laboratory Findings

|                                                                                               |    |
|-----------------------------------------------------------------------------------------------|----|
| Table S50. Data of White Blood Cell Count between Nonsurvivors and Survivors .....            | 18 |
| Table S51. Data of Neutrophil Count between Nonsurvivors and Survivors.....                   | 18 |
| Table S52. Data of Lymphocyte Count between Nonsurvivors and Survivors.....                   | 19 |
| Table S53. Data of Monocyte Count between Nonsurvivors and Survivors.....                     | 19 |
| Table S54. Data of Platelet Count between Nonsurvivors and Survivors .....                    | 19 |
| Table S55. Data of Hemoglobin between Nonsurvivors and Survivors.....                         | 19 |
| Table S56. Data of Albumin between Nonsurvivors and Survivors .....                           | 20 |
| Table S57. Data of Total Bilirubin between Nonsurvivors and Survivors.....                    | 20 |
| Table S58. Data of ALT between Nonsurvivors and Survivors.....                                | 20 |
| Table S59. Data of AST between Nonsurvivors and Survivors.....                                | 20 |
| Table S60. Data of Creatinine between Nonsurvivors and Survivors.....                         | 21 |
| Table S61. Data of Blood Urea Nitrogen between Nonsurvivors and Survivors.....                | 21 |
| Table S62. Data of Urea between Nonsurvivors and Survivors.....                               | 21 |
| Table S63. Data of Prothrombin Time between Nonsurvivors and Survivors .....                  | 21 |
| Table S64. Data of APTT between Nonsurvivors and Survivors.....                               | 21 |
| Table S65. Data of C-reactive Protein between Nonsurvivors and Survivors.....                 | 22 |
| Table S66. Data of D-dimer between Nonsurvivors and Survivors .....                           | 22 |
| Table S67. Data of Procalcitonin between Nonsurvivors and Survivors .....                     | 22 |
| Table S68. Data of Ferritin between Nonsurvivors and Survivors.....                           | 22 |
| Table S69. Data of Lactate Dehydrogenase between Nonsurvivors and Survivors .....             | 23 |
| Table S70. Data of Creatine Kinase between Nonsurvivors and Survivors .....                   | 23 |
| Table S71. Data of $\gamma$ -glutamyl Transpeptidase between Nonsurvivors and Survivors ..... | 23 |
| Table S72. Data of ESR between Nonsurvivors and Survivors .....                               | 23 |

|                                                                                                                         |    |
|-------------------------------------------------------------------------------------------------------------------------|----|
| Table S73. Data of Creatine Kinase-MB between Nonsurvivors and Survivors.....                                           | 23 |
| Table S74. Data of NT-proBNP between Nonsurvivors and Survivors .....                                                   | 24 |
| Table S75. Data of hs-cTnI between Nonsurvivors and Survivors .....                                                     | 24 |
| Table S76. Data of Myoglobin between Nonsurvivors and Survivors.....                                                    | 24 |
| Table S77. Data of Cystatin C between Nonsurvivors and Survivors.....                                                   | 24 |
| Table S78. Data of Interleukin-6 between Nonsurvivors and Survivors.....                                                | 24 |
| Table S79. Data of CD3+ Cell Count between Nonsurvivors and Survivors.....                                              | 24 |
| Table S80. Data of CD4+ Cell Count between Nonsurvivors and Survivors.....                                              | 25 |
| Table S81. Data of CD8+ Cell Count between Nonsurvivors and Survivors.....                                              | 25 |
| Table S82. Data of Association between Increased White Blood Cell Count ( $\geq 10 \times 10^9/L$ ) and Mortality ..... | 25 |
| Table S83. Data of Association between Decreased Lymphocyte Count ( $< 0.8 \times 10^9/L$ ) and Mortality .....         | 25 |
| Table S84. Data of Association between Decreased Lymphocyte Count ( $< 1.1 \times 10^9/L$ ) and Mortality .....         | 25 |
| Table S85. Data of Association between Decreased Platelet Count ( $< 100 \times 10^9/L$ ) and Mortality .....           | 25 |
| Table S86. Data of Association between Decreased Platelet Count ( $< 125 \times 10^9/L$ ) and Mortality .....           | 26 |
| Table S87. Data of Association between Increased ALT ( $> 40$ U/L) and Mortality.....                                   | 26 |
| Table S88. Data of Association between Increased AST ( $> 40$ U/L) and Mortality .....                                  | 26 |
| Table S89. Data of Association between Increased Creatinine ( $> 133 \mu\text{mol/L}$ ) and Mortality.....              | 26 |
| Table S90. Data of Association between Increased Procalcitonin ( $\geq 0.5$ ng/mL) and Mortality .....                  | 26 |
| Table S91. Data of Association between Increased Procalcitonin ( $\geq 0.1$ ng/mL) and Mortality .....                  | 26 |
| Table S92. Data of Association between Increased Procalcitonin ( $\geq 0.05$ ng/mL) and Mortality .....                 | 26 |
| Table S93. Data of Association between Increased C-reactive Protein ( $\geq 10$ mg/L) and Mortality .....               | 26 |
| Table S94. Data of Association between Increased D-dimer ( $> 1.0 \mu\text{g/mL}$ ) and Mortality.....                  | 27 |
| Table S95. Data of Association between Respiratory Rate $\geq 30$ breaths per min and Mortality .....                   | 27 |
| Table S96. Data of Association between Respiratory Rate $\geq 24$ breaths per min and Mortality .....                   | 27 |
| <b>Other Predictors</b>                                                                                                 |    |
| Table S97. Data of Association between Bilateral Pneumonia and Mortality .....                                          | 27 |
| Table S98. Data of Association between Highest Temperature $\geq 39$ °C and Mortality .....                             | 27 |
| Table S99. Data of Respiratory Rate between Nonsurvivors and Survivors.....                                             | 27 |
| Table S100. Data of Heart Rate between Nonsurvivors and Survivors .....                                                 | 28 |
| Table S101. Data of PaO <sub>2</sub> between Nonsurvivors and Survivors .....                                           | 28 |
| Table S102. Data of PaCO <sub>2</sub> between Nonsurvivors and Survivors.....                                           | 28 |
| Table S103. Data of SpO <sub>2</sub> between Nonsurvivors and Survivors .....                                           | 28 |
| Table S104. Data of PaO <sub>2</sub> /FiO <sub>2</sub> between Nonsurvivors and Survivors.....                          | 28 |
| Table S105. Data of APACHE II Score between Nonsurvivors and Survivors .....                                            | 29 |
| Table S106. Data of SOFA Score between Nonsurvivors and Survivors .....                                                 | 29 |
| Table S107 Data of Time from Illness Onset to Hospital Admission between Nonsurvivors and Survivors .....               | 29 |
| <b>Sensitivity Analyses</b>                                                                                             |    |
| Table S108. Sensitivity Analyses of Dichotomous Prognostic Factors .....                                                | 30 |
| Table S109. Sensitivity Analyses of Continuous Prognostic Factors .....                                                 | 31 |
| <b>FIGURES</b>                                                                                                          |    |
| <b>Demographic Factors</b>                                                                                              |    |
| Figure S1. Forest plot of mean difference in age between nonsurvivors and survivors .....                               | 32 |
| Figure S2. Forest plot of association between advanced age and mortality .....                                          | 32 |
| Figure S3. Forest plot of association between male sex and mortality .....                                              | 32 |

|                                                                                                           |    |
|-----------------------------------------------------------------------------------------------------------|----|
| Figure S4. Forest plot of association between current smoking and mortality.....                          | 33 |
| <b>Comorbid Conditions</b>                                                                                |    |
| Figure S5. Forest plot of association between preexisting any comorbidity and mortality .....             | 33 |
| Figure S6. Forest plot of association between preexisting chronic kidney disease and mortality .....      | 33 |
| Figure S7. Forest plot of association between cerebrovascular disease and mortality .....                 | 33 |
| Figure S8. Forest plot of association between preexisting chronic respiratory disease and mortality ..... | 34 |
| Figure S9. Forest plot of association between preexisting cardiovascular disease and mortality .....      | 34 |
| Figure S10. Forest plot of association between preexisting diabetes mellitus and mortality .....          | 34 |
| Figure S11. Forest plot of association between preexisting hypertension and mortality .....               | 34 |
| Figure S12. Forest plot of association between preexisting malignancy and mortality .....                 | 35 |
| Figure S13. Forest plot of association between preexisting gastrointestinal disease and mortality .....   | 35 |
| Figure S14. Forest plot of association between preexisting chronic liver disease and mortality .....      | 35 |
| Figure S15. Forest plot of association between preexisting autoimmune disease and mortality .....         | 35 |
| <b>Clinical Symptoms</b>                                                                                  |    |
| Figure S16. Forest plot of association between symptoms of fever and mortality .....                      | 36 |
| Figure S17. Forest plot of association between symptoms of cough and mortality .....                      | 36 |
| Figure S18. Forest plot of association between symptoms of dyspnea and mortality .....                    | 36 |
| Figure S19. Forest plot of association between symptoms of chest tightness and mortality.....             | 36 |
| Figure S20. Forest plot of association between symptoms of sputum production and mortality .....          | 37 |
| Figure S21. Forest plot of association between symptoms of fatigue and mortality .....                    | 37 |
| Figure S22. Forest plot of association between symptoms of anorexia and mortality .....                   | 37 |
| Figure S23. Forest plot of association between symptoms of diarrhea and mortality .....                   | 37 |
| Figure S24. Forest plot of association between symptoms of myalgia and mortality .....                    | 38 |
| Figure S25. Forest plot of association between symptoms of dizziness and mortality .....                  | 38 |
| Figure S26. Forest plot of association between symptoms of nausea and mortality .....                     | 38 |
| Figure S27. Forest plot of association between symptoms of headache and mortality .....                   | 38 |
| Figure S28. Forest plot of association between symptoms of vomiting and mortality.....                    | 39 |
| Figure S29. Forest plot of association between symptoms of pharyngalgia and mortality .....               | 39 |
| Figure S30. Forest plot of association between symptoms of hemoptysis and mortality .....                 | 39 |
| <b>Complications</b>                                                                                      |    |
| Figure S31. Forest plot of association between shock and mortality .....                                  | 39 |
| Figure S32. Forest plot of association between acute infection and mortality .....                        | 39 |
| Figure S33. Forest plot of association between acute kidney injury and mortality .....                    | 40 |
| Figure S34. Forest plot of association between acute cardiac injury and mortality .....                   | 40 |
| Figure S35. Forest plot of association between acute respiratory distress syndrome and mortality.....     | 40 |
| Figure S36. Forest plot of association between arrhythmia and mortality .....                             | 40 |
| Figure S37. Forest plot of association between heart failure and mortality .....                          | 41 |
| Figure S38. Forest plot of association between acute liver injury and mortality .....                     | 41 |
| Figure S39. Forest plot of association between sepsis and mortality .....                                 | 41 |
| <b>Supportive Therapy</b>                                                                                 |    |
| Figure S40. Forest plot of association between renal replacement therapy and mortality .....              | 41 |
| Figure S41. Forest plot of association between invasive mechanical ventilation and mortality .....        | 42 |
| Figure S42. Forest plot of association between noninvasive ventilation and mortality .....                | 42 |
| Figure S43. Forest plot of association between high flow nasal cannula and mortality .....                | 42 |
| Figure S44. Forest plot of association between ECMO and mortality .....                                   | 42 |

## Therapeutic Predictors

|                                                                                           |    |
|-------------------------------------------------------------------------------------------|----|
| Figure S45. Forest plot of association between corticosteroid therapy and mortality ..... | 43 |
| Figure S46. Forest plot of association between antibiotic therapy and mortality.....      | 43 |
| Figure S47. Forest plot of association between immunoglobulin therapy and mortality ..... | 43 |
| Figure S48. Forest plot of association between antiviral therapy and mortality .....      | 43 |

## Laboratory Findings

|                                                                                                                                |    |
|--------------------------------------------------------------------------------------------------------------------------------|----|
| Figure S49. Forest plot of mean difference in white blood cell count between nonsurvivors and survivors .....                  | 44 |
| Figure S50. Forest plot of mean difference in neutrophil count between nonsurvivors and survivors .....                        | 44 |
| Figure S51. Forest plot of mean difference in lymphocyte count between nonsurvivors and survivors .....                        | 44 |
| Figure S52. Forest plot of mean difference in monocyte count between nonsurvivors and survivors .....                          | 44 |
| Figure S53. Forest plot of mean difference in platelet count between nonsurvivors and survivors .....                          | 45 |
| Figure S54. Forest plot of mean difference in hemoglobin between nonsurvivors and survivors.....                               | 45 |
| Figure S55. Forest plot of mean difference in albumin between nonsurvivors and survivors.....                                  | 45 |
| Figure S56. Forest plot of mean difference in total bilirubin between nonsurvivors and survivors.....                          | 45 |
| Figure S57. Forest plot of mean difference in ALT between nonsurvivors and survivors.....                                      | 45 |
| Figure S58. Forest plot of mean difference in AST between nonsurvivors and survivors .....                                     | 46 |
| Figure S59. Forest plot of mean difference in creatinine between nonsurvivors and survivors .....                              | 46 |
| Figure S60. Forest plot of mean difference in blood urea nitrogen between nonsurvivors and survivors.....                      | 46 |
| Figure S61. Forest plot of mean difference in urea between nonsurvivors and survivors.....                                     | 46 |
| Figure S62. Forest plot of mean difference in prothrombin time between nonsurvivors and survivors.....                         | 46 |
| Figure S63. Forest plot of mean difference in APTT between nonsurvivors and survivors.....                                     | 47 |
| Figure S64. Forest plot of mean difference in C-reactive protein between nonsurvivors and survivors .....                      | 47 |
| Figure S65. Forest plot of mean difference in D-dimer between nonsurvivors and survivors .....                                 | 47 |
| Figure S66. Forest plot of mean difference in procalcitonin between nonsurvivors and survivors.....                            | 47 |
| Figure S67. Forest plot of mean difference in ferritin between nonsurvivors and survivors.....                                 | 47 |
| Figure S68. Forest plot of mean difference in lactate dehydrogenase between nonsurvivors and survivors.....                    | 48 |
| Figure S69. Forest plot of mean difference in creatine kinase between nonsurvivors and survivors .....                         | 48 |
| Figure S70. Forest plot of mean difference in $\gamma$ -glutamyl transpeptidase between nonsurvivors and survivors.....        | 48 |
| Figure S71. Forest plot of mean difference in ESR between nonsurvivors and survivors .....                                     | 48 |
| Figure S72. Forest plot of mean difference in creatine kinase-MB between nonsurvivors and survivors .....                      | 48 |
| Figure S73. Forest plot of mean difference in NT-proBNP between nonsurvivors and survivors .....                               | 49 |
| Figure S74. Forest plot of mean difference in hs-cTnI between nonsurvivors and survivors .....                                 | 49 |
| Figure S75. Forest plot of mean difference in myoglobin between nonsurvivors and survivors .....                               | 49 |
| Figure S76. Forest plot of mean difference in cystatin C between nonsurvivors and survivors.....                               | 49 |
| Figure S77. Forest plot of mean difference in interleukin-6 between nonsurvivors and survivors .....                           | 49 |
| Figure S78. Forest plot of mean difference in CD3+ cell count between nonsurvivors and survivors .....                         | 49 |
| Figure S79. Forest plot of mean difference in CD4+ cell count between nonsurvivors and survivors .....                         | 50 |
| Figure S80. Forest plot of mean difference in CD8+ cell count between nonsurvivors and survivors .....                         | 50 |
| Figure S81. Forest plot of association between increased white blood cell count ( $\geq 10 \times 10^9/L$ ) and mortality..... | 50 |
| Figure S82. Forest plot of association between decreased lymphocyte count ( $< 0.8 \times 10^9/L$ ) and mortality.....         | 50 |
| Figure S83. Forest plot of association between decreased lymphocyte count ( $< 1.1 \times 10^9/L$ ) and mortality.....         | 50 |
| Figure S84. Forest plot of association between decreased platelet count ( $< 100 \times 10^9/L$ ) and mortality.....           | 51 |
| Figure S85. Forest plot of association between decreased platelet count ( $< 125 \times 10^9/L$ ) and mortality.....           | 51 |
| Figure S86. Forest plot of association between increased ALT ( $> 40$ U/L) and mortality.....                                  | 51 |
| Figure S87. Forest plot of association between increased AST ( $> 40$ U/L) and mortality.....                                  | 51 |

|                                                                                                                                      |    |
|--------------------------------------------------------------------------------------------------------------------------------------|----|
| Figure S88. Forest plot of association between increased creatinine (>133 µmol/L) and mortality .....                                | 51 |
| Figure S89. Forest plot of association between increased procalcitonin (≥0.5 ng/mL) and mortality .....                              | 52 |
| Figure S90. Forest plot of association between increased procalcitonin (≥0.1 ng/mL) and mortality .....                              | 52 |
| Figure S91. Forest plot of association between increased procalcitonin (≥0.05 ng/mL) and mortality .....                             | 52 |
| Figure S92. Forest plot of association between increased C-reactive protein (≥10 mg/L) and mortality.....                            | 52 |
| Figure S93. Forest plot of association between increased D-dimer (>1.0 µg/mL) and mortality.....                                     | 52 |
| <b>Other Predictors</b>                                                                                                              |    |
| Figure S94. Forest plot of association between respiratory rate ≥30 breaths per min and mortality.....                               | 53 |
| Figure S95. Forest plot of association between respiratory rate ≥24 breaths per min and mortality.....                               | 53 |
| Figure S96. Forest plot of association between bilateral pneumonia and mortality.....                                                | 53 |
| Figure S97. Forest plot of association between highest temperature ≥39 °C and mortality.....                                         | 53 |
| Figure S98. Forest plot of mean difference in respiratory rate between nonsurvivors and survivors.....                               | 53 |
| Figure S99. Forest plot of mean difference in heart rate between nonsurvivors and survivors.....                                     | 54 |
| Figure S100. Forest plot of mean difference in PaO <sub>2</sub> between nonsurvivors and survivors .....                             | 54 |
| Figure S101. Forest plot of mean difference in PaCO <sub>2</sub> between nonsurvivors and survivors.....                             | 54 |
| Figure S102. Forest plot of mean difference in SpO <sub>2</sub> between nonsurvivors and survivors .....                             | 54 |
| Figure S103. Forest plot of mean difference in PaO <sub>2</sub> /FiO <sub>2</sub> between nonsurvivors and survivors.....            | 54 |
| Figure S104. Forest plot of mean difference in APACHE II score between nonsurvivors and survivors.....                               | 55 |
| Figure S105. Forest plot of mean difference in SOFA score between nonsurvivors and survivors .....                                   | 55 |
| Figure S106. Forest plot of mean difference in time from illness onset to hospital admission between nonsurvivors and survivors..... | 55 |

## Notes and Abbreviations

### Notes:

The study by Guan WJ et al. included 1590 patients from Renmin Hospital of Wuhan University, Jinyintan Hospital, Union Hospital, Central Hospital of Wuhan, Wuhan Pulmonary Hospital and other 570 hospitals in China. The study by Guan WJ et al. and the studies from the above-mentioned hospitals (e.g. the studies by Du RH et al. and Zhou F et al.) contained duplicate patients. To avoid potential patient overlap, we extracted the data only from the study by Guan WJ et al. (the larger study) for analyses if multidata were available.

### Abbreviations:

ALT, alanine aminotransferase; APACHE II, Acute Physiology and Chronic Health Evaluation II; APTT, activated partial thromboplastin time; AST, aspartate aminotransferase; ESR, erythrocyte sedimentation rate; ECMO, extracorporeal membrane oxygenation; hs-cTnI, hypersensitive cardiac troponin I; PaCO<sub>2</sub>, partial pressure of carbon dioxide; PaO<sub>2</sub>, partial pressure of oxygen; PaO<sub>2</sub>/FiO<sub>2</sub>, ratio of partial pressure of oxygen to fraction of inspired oxygen; NT-proBNP, N-terminal pro-brain natriuretic peptide; SOFA, Sequential Organ Failure Assessment; SpO<sub>2</sub>, peripheral oxygen saturation.

- a: The number of persons exposed to risk factors in nonsurvivor group.
- b: The number of persons unexposed to risk factors in nonsurvivor group.
- c: The number of persons exposed to risk factors in survivor group.
- d: The number of persons unexposed to risk factors in survivor group.

**Table S1. Quality Assessments of the Included Studies**

| Study               | Study participation | Study attrition | Prognostic factor measurement | Outcome measurement | Study confounding | Statistical analysis and reporting |
|---------------------|---------------------|-----------------|-------------------------------|---------------------|-------------------|------------------------------------|
| Cao J et al.        | Low risk            | Low risk        | Moderate risk                 | Low risk            | High risk         | Moderate risk                      |
| Chen R et al.       | Moderate risk       | Low risk        | Moderate risk                 | Low risk            | Low risk          | Low risk                           |
| Chen T et al. (a)   | Low risk            | Low risk        | Moderate risk                 | Low risk            | Low risk          | Low risk                           |
| Chen T et al. (b)   | Low risk            | Low risk        | Moderate risk                 | Low risk            | High risk         | Moderate risk                      |
| Cheng Y et al.      | Low risk            | Low risk        | Moderate risk                 | Low risk            | Low risk          | Low risk                           |
| Deng Y et al.       | Low risk            | Low risk        | Moderate risk                 | Low risk            | High risk         | Moderate risk                      |
| Du RH et al.        | Low risk            | Low risk        | Moderate risk                 | Low risk            | Low risk          | Low risk                           |
| Gao L et al.        | High risk           | High risk       | Moderate risk                 | Low risk            | Low risk          | Low risk                           |
| Grasselli L et al.  | Low risk            | Low risk        | Low risk                      | Low risk            | High risk         | Moderate risk                      |
| Guan WJ et al.      | Low risk            | Low risk        | Moderate risk                 | Low risk            | Low risk          | Low risk                           |
| Guo T et al.        | Low risk            | Low risk        | Low risk                      | Low risk            | High risk         | Moderate risk                      |
| He XW et al.        | Low risk            | Low risk        | Low risk                      | Low risk            | High risk         | Moderate risk                      |
| Hu H et al.         | Low risk            | Low risk        | Moderate risk                 | Low risk            | High risk         | Moderate risk                      |
| Li J et al.         | High risk           | High risk       | Low risk                      | Low risk            | High risk         | Moderate risk                      |
| Li X et al.         | Low risk            | Low risk        | Moderate risk                 | Low risk            | Low risk          | Low risk                           |
| Liang WH et al.     | Low risk            | Low risk        | Moderate risk                 | Low risk            | Low risk          | Low risk                           |
| Liu Y et al. (a)    | Low risk            | Low risk        | Low risk                      | Low risk            | Low risk          | Low risk                           |
| Liu Y et al. (b)    | Low risk            | Low risk        | Low risk                      | Low risk            | High risk         | Moderate risk                      |
| Luo M et al.        | Moderate risk       | Low risk        | Moderate risk                 | Low risk            | Low risk          | Low risk                           |
| Miyashita H et al.  | Moderate risk       | Low risk        | Moderate risk                 | Low risk            | High risk         | Moderate risk                      |
| Peng YD et al.      | Low risk            | Low risk        | Moderate risk                 | Low risk            | High risk         | Moderate risk                      |
| Richardson S et al. | Low risk            | Low risk        | Low risk                      | Low risk            | High risk         | Moderate risk                      |
| Shi S et al.        | Low risk            | Low risk        | Low risk                      | Low risk            | High risk         | Moderate risk                      |
| Tang N et al. (a)   | Low risk            | Low risk        | Low risk                      | Low risk            | Low risk          | Low risk                           |
| Tang N et al. (b)   | Low risk            | Low risk        | Low risk                      | Low risk            | High risk         | Moderate risk                      |
| Wang L et al. (a)   | Low risk            | Low risk        | Low risk                      | Low risk            | Low risk          | Low risk                           |
| Wang L et al. (b)   | Low risk            | Low risk        | Moderate risk                 | Low risk            | Low risk          | Low risk                           |
| Wu C et al.         | Low risk            | Low risk        | Moderate risk                 | Low risk            | High risk         | Moderate risk                      |
| Xie J et al.        | Low risk            | Low risk        | Moderate risk                 | Low risk            | Low risk          | Low risk                           |
| Xu B et al.         | Low risk            | Low risk        | Moderate risk                 | Low risk            | High risk         | Moderate risk                      |
| Yang X et al. (a)   | Moderate risk       | Low risk        | Moderate risk                 | Low risk            | High risk         | Moderate risk                      |
| Yang X et al. (b)   | Low risk            | Low risk        | Moderate risk                 | Low risk            | High risk         | Moderate risk                      |
| Yao Q et al.        | Low risk            | Low risk        | Moderate risk                 | Low risk            | High risk         | Moderate risk                      |
| Zhang J et al.      | Low risk            | Low risk        | Moderate risk                 | Low risk            | High risk         | Moderate risk                      |
| Zhang L et al.      | Low risk            | Low risk        | Moderate risk                 | Low risk            | Low risk          | Low risk                           |
| Zhou F et al.       | Low risk            | Low risk        | Moderate risk                 | Low risk            | Low risk          | Low risk                           |



**Table S2. Data of Age between Nonsurvivors and Survivors**

| Study             | Nonsurvivors |       |       | Survivors |       |       | Setting                                                               |
|-------------------|--------------|-------|-------|-----------|-------|-------|-----------------------------------------------------------------------|
|                   | Mean         | SD    | Total | Mean      | SD    | Total |                                                                       |
| Cao J et al.      | 72           | 14.55 | 17    | 55.33     | 14.33 | 85    | Zhongnan Hospital                                                     |
| Du RH et al.      | 70.2         | 7.7   | 21    | 56        | 13.5  | 158   | Wuhan Pulmonary Hospital                                              |
| Hu H et al.       | 75.05        | 12.94 | 19    | 57.71     | 15.34 | 86    | Renmin Hospital of Wuhan University (2020 Feb 7-Mar 7)                |
| Tang N et al. (a) | 68.7         | 11.4  | 134   | 63.7      | 12.2  | 315   | Tongji Hospital                                                       |
| Wu C et al.       | 67.6         | 12.03 | 44    | 47.33     | 10.51 | 117   | Wuhan Jinyintan Hospital                                              |
| Xu B et al.       | 72.75        | 7.23  | 28    | 55        | 17.26 | 117   | Hubei Provincial Hospital of traditional Chinese and Western medicine |
| Yao Q et al.      | 63.17        | 18.87 | 12    | 56.67     | 10.8  | 13    | Huanggang Central Hospital                                            |
| Zhang J et al.    | 68.7         | 13.36 | 25    | 56.7      | 18.57 | 638   | Renmin Hospital of Wuhan University (2020 Jan 11-Feb 6)               |

**Table S3. Data of Association between Advanced Age and Mortality**

| Study               | a   | b   | c    | d    | Setting                                    | Definition |
|---------------------|-----|-----|------|------|--------------------------------------------|------------|
| Chen T et al. (a)   | 94  | 19  | 59   | 102  | Tongji Hospital                            | ≥60 years  |
| Chen T et al. (b)   | 19  | 7   | 36   | 141  | Zhongnan Hospital                          | ≥65 years  |
| Du RH et al.        | 17  | 4   | 48   | 110  | Wuhan Pulmonary Hospital                   | ≥65 years  |
| Grasselli L et al.  | 283 | 119 | 503  | 676  | ICUs in 72 hospitals                       | ≥64 years  |
| Luo M et al.        | 32  | 37  | 48   | 358  | Wuhan Tongren Hospital                     | ≥70 years  |
| Miyashita H et al.  | 371 | 184 | 1588 | 3545 | Mount Sinai Health System in New York City | >65 years  |
| Richardson S et al. | 419 | 134 | 676  | 1405 | A total of 12 hospitals in the USA         | >65 years  |
| Yang X et al. (b)   | 20  | 12  | 7    | 13   | Wuhan Jin Yintan hospital                  | ≥60 years  |
| Yao Q et al.        | 6   | 6   | 11   | 85   | Huanggang Central Hospital                 | >65 years  |
| Zhang J et al.      | 19  | 6   | 296  | 342  | Renmin Hospital of Wuhan University        | >60 years  |

**Table S4. Data of Association between Male Sex and Mortality**

| Study               | a   | b   | c    | d   | Setting                                                               |
|---------------------|-----|-----|------|-----|-----------------------------------------------------------------------|
| Du RH et al.        | 10  | 11  | 87   | 71  | Wuhan Pulmonary Hospital                                              |
| Hu H et al.         | 14  | 5   | 48   | 38  | Renmin Hospital of Wuhan University (2020 Feb 7-Mar 7)                |
| Li J et al.         | 40  | 24  | 257  | 337 | Central Hospital of Wuhan                                             |
| Liu Y et al. (a)    | 25  | 8   | 89   | 123 | Zhongnan Hospital                                                     |
| Luo M et al.        | 46  | 23  | 185  | 221 | Wuhan Tongren Hospital                                                |
| Richardson S et al. | 337 | 216 | 1162 | 919 | A total of 12 hospitals in the USA                                    |
| Tang N et al. (a)   | 90  | 44  | 178  | 137 | Tongji Hospital                                                       |
| Xu B et al.         | 17  | 11  | 59   | 58  | Hubei Provincial Hospital of Traditional Chinese and Western Medicine |
| Yang X et al. (a)   | 156 | 82  | 620  | 618 | Wuhan Jinyintan Hospital                                              |
| Yao Q et al.        | 7   | 5   | 36   | 60  | Huanggang Central Hospital                                            |
| Zhang J et al.      | 15  | 10  | 306  | 332 | Renmin Hospital of Wuhan University (2020 Jan 11-Feb 6)               |

**Table S5. Data of Association between Current Smoking and Mortality**

| Study             | a | b   | c | d   | Setting                                         |
|-------------------|---|-----|---|-----|-------------------------------------------------|
| Chen T et al. (a) | 7 | 106 | 5 | 156 | Tongji Hospital                                 |
| Liu Y et al. (a)  | 3 | 30  | 7 | 205 | Zhongnan Hospital                               |
| Yao Q et al.      | 3 | 9   | 1 | 95  | Huanggang Central Hospital                      |
| Zhou F et al.     | 5 | 49  | 6 | 131 | Jinyintan Hospital and Wuhan Pulmonary Hospital |

**Table S6. Data of Association between Preexisting Any Comorbidity and Mortality**

| Study             | a  | b  | c   | d    | Setting                                                               |
|-------------------|----|----|-----|------|-----------------------------------------------------------------------|
| Cao J et al.      | 13 | 4  | 34  | 51   | Zhongnan Hospital                                                     |
| Guan WJ et al.    | 35 | 15 | 364 | 1176 | A total of 575 hospitals in China                                     |
| Luo M et al.      | 45 | 24 | 15  | 391  | Wuhan Tongren Hospital                                                |
| Tang N et al. (a) | 91 | 43 | 181 | 134  | Tongji Hospital                                                       |
| Xu B et al.       | 21 | 7  | 47  | 70   | Hubei Provincial Hospital of Traditional Chinese and Western Medicine |

**Table S7. Data of Association between Preexisting Chronic Kidney Disease and Mortality**

| Study             | a | b   | c  | d    | Setting                                                               |
|-------------------|---|-----|----|------|-----------------------------------------------------------------------|
| Cao J et al.      | 3 | 14  | 1  | 84   | Zhongnan Hospital                                                     |
| Chen T et al. (a) | 4 | 109 | 1  | 160  | Tongji Hospital                                                       |
| Guan WJ et al.    | 5 | 45  | 16 | 1524 | A total of 575 hospitals in China                                     |
| Xu B et al.       | 2 | 26  | 2  | 115  | Hubei Provincial Hospital of Traditional Chinese and Western Medicine |

**Table S8. Data of Association between Cerebrovascular Disease and Mortality**

| Study             | a | b   | c  | d    | Setting                                                     |
|-------------------|---|-----|----|------|-------------------------------------------------------------|
| Cao J et al.      | 3 | 14  | 3  | 82   | Zhongnan Hospital                                           |
| Chen T et al. (a) | 4 | 109 | 0  | 161  | Tongji Hospital                                             |
| Guan WJ et al.    | 6 | 44  | 24 | 1516 | A total of 575 hospitals in China (2019 Dec 11-2020 Jan 31) |
| Hu H et al.       | 3 | 16  | 1  | 85   | Renmin Hospital of Wuhan University (2020 Feb 7-Mar 7)      |

**Table S9. Data of Association between Preexisting Chronic Respiratory Disease and Mortality**

| Study             | a  | b   | c  | d    | Setting                                                               |
|-------------------|----|-----|----|------|-----------------------------------------------------------------------|
| Chen T et al. (a) | 11 | 102 | 7  | 154  | Tongji Hospital                                                       |
| Guan WJ et al.    | 6  | 44  | 18 | 1522 | A total of 575 hospitals in China (2019 Dec 11-2020 Jan 31)           |
| Hu H et al.       | 5  | 14  | 7  | 79   | Renmin Hospital of Wuhan University (2020 Feb 7-Mar 7)                |
| Liu Y et al. (a)  | 3  | 30  | 5  | 207  | Zhongnan Hospital                                                     |
| Xu B et al.       | 0  | 28  | 2  | 115  | Hubei Provincial Hospital of Traditional Chinese and Western Medicine |

**Table S10. Data of Association between Preexisting Cardiovascular Disease and Mortality**

| Study             | a  | b  | c  | d    | Setting                                                     |
|-------------------|----|----|----|------|-------------------------------------------------------------|
| Cao J et al.      | 3  | 14 | 2  | 83   | Zhongnan Hospital                                           |
| Chen T et al. (a) | 16 | 97 | 7  | 154  | Tongji Hospital                                             |
| Guan WJ et al.    | 8  | 42 | 51 | 1489 | A total of 575 hospitals in China (2019 Dec 11-2020 Jan 31) |
| Guo T et al.      | 29 | 14 | 37 | 107  | Seventh Hospital of Wuhan City                              |
| Hu H et al.       | 1  | 18 | 5  | 81   | Renmin Hospital of Wuhan University (2020 Feb 7-Mar 7)      |

**Table S11. Data of Association between Preexisting Diabetes Mellitus and Mortality**

| Study             | a  | b  | c   | d    | Setting                                                     |
|-------------------|----|----|-----|------|-------------------------------------------------------------|
| Chen T et al. (a) | 24 | 89 | 23  | 138  | Tongji Hospital                                             |
| Guan WJ et al.    | 13 | 37 | 117 | 1423 | A total of 575 Hospitals in China (2019 Dec 11-2020 Jan 31) |
| Hu H et al.       | 0  | 19 | 4   | 82   | Renmin Hospital of Wuhan University (2020 Feb 7-Mar 7)      |
| Liu Y et al. (a)  | 7  | 26 | 16  | 196  | Zhongnan Hospital                                           |
| Luo M et al.      | 4  | 65 | 13  | 393  | Wuhan Tongren Hospital                                      |

**Table S12. Data of Association between Preexisting Hypertension and Mortality**

| Study              | a   | b   | c   | d    | Setting                                                               |
|--------------------|-----|-----|-----|------|-----------------------------------------------------------------------|
| Chen T et al. (a)  | 54  | 59  | 39  | 122  | Tongji Hospital                                                       |
| Grasselli L et al. | 195 | 114 | 84  | 128  | ICUs in 72 hospitals                                                  |
| Guan WJ et al.     | 28  | 22  | 241 | 1299 | A total of 575 Hospitals in China (2019 Dec 11-2020 Jan 31)           |
| Hu H et al.        | 6   | 13  | 22  | 64   | Renmin Hospital of Wuhan University (2020 Feb 7-Mar 7)                |
| Liu Y et al. (a)   | 15  | 18  | 37  | 175  | Zhongnan Hospital                                                     |
| Xu B et al.        | 10  | 18  | 21  | 96   | Hubei Provincial Hospital of Traditional Chinese and Western Medicine |

**Table S13. Data of Association between Preexisting Malignancy and Mortality**

| Study              | a  | b   | c   | d    | Setting                                                     |
|--------------------|----|-----|-----|------|-------------------------------------------------------------|
| Chen T et al. (a)  | 5  | 108 | 2   | 159  | Tongji Hospital                                             |
| Guan WJ et al.     | 3  | 47  | 15  | 1525 | A total of 575 Hospitals in China (2019 Dec 11-2020 Jan 31) |
| Hu H et al.        | 1  | 18  | 5   | 81   | Renmin Hospital of Wuhan University (2020 Feb 7-Mar 7)      |
| Liu Y et al. (a)   | 2  | 31  | 7   | 205  | Zhongnan Hospital                                           |
| Miyashita H et al. | 37 | 518 | 297 | 4836 | Mount Sinai Health System in New York City                  |

**Table S14. Data of Association between Preexisting Gastrointestinal Disease and Mortality**

| Study             | a | b   | c  | d   | Setting                             |
|-------------------|---|-----|----|-----|-------------------------------------|
| Chen T et al. (a) | 1 | 112 | 2  | 159 | Tongji Hospital                     |
| Du RH et al.      | 4 | 17  | 17 | 141 | Wuhan Pulmonary Hospital            |
| Zhang J et al.    | 1 | 24  | 30 | 608 | Renmin Hospital of Wuhan University |

**Table S15. Data of Association between Preexisting Chronic Liver Disease and Mortality**

| Study             | a | b   | c  | d    | Setting                           | Definition                                   |
|-------------------|---|-----|----|------|-----------------------------------|----------------------------------------------|
| Chen T et al. (a) | 5 | 108 | 6  | 155  | Tongji Hospital                   | Hepatitis B virus surface antigen positivity |
| Guan WJ et al.    | 1 | 49  | 27 | 1513 | A total of 575 hospitals in China | Hepatitis B infection                        |
| Liu Y et al. (a)  | 2 | 31  | 5  | 207  | Zhongnan Hospital                 | Chronic liver Disease                        |

**Table S16. Data of Association between Preexisting Autoimmune Disease and Mortality**

| Study             | a | b   | c | d   | Setting                             |
|-------------------|---|-----|---|-----|-------------------------------------|
| Chen T et al. (a) | 1 | 112 | 1 | 160 | Tongji Hospital                     |
| Wang L et al. (b) | 1 | 64  | 4 | 270 | Renmin Hospital of Wuhan University |

**Table S17. Data of Association between Symptoms of Fever and Mortality**

| Study             | a   | b | c   | d   | Setting                                                               |
|-------------------|-----|---|-----|-----|-----------------------------------------------------------------------|
| Cao J et al.      | 12  | 5 | 61  | 24  | Zhongnan Hospital                                                     |
| Chen T et al. (a) | 104 | 9 | 145 | 16  | Tongji Hospital                                                       |
| Du RH et al.      | 21  | 0 | 156 | 2   | Wuhan Pulmonary Hospital                                              |
| Wu C et al.       | 39  | 5 | 149 | 8   | Wuhan Jinyintan Hospital                                              |
| Xu B et al.       | 23  | 5 | 96  | 21  | Hubei Provincial Hospital of Traditional Chinese and Western Medicine |
| Yao Q et al.      | 8   | 4 | 72  | 24  | Huanggang Central Hospital                                            |
| Zhang J et al.    | 19  | 6 | 508 | 130 | Renmin Hospital of Wuhan University                                   |

**Table S18. Data of Association between Symptoms of Cough and Mortality**

| Study             | a  | b  | c   | d   | Setting                                                               |
|-------------------|----|----|-----|-----|-----------------------------------------------------------------------|
| Cao J et al.      | 8  | 9  | 42  | 43  | Zhongnan Hospital                                                     |
| Chen T et al. (a) | 79 | 34 | 106 | 55  | Tongji Hospital                                                       |
| Du RH et al.      | 14 | 7  | 132 | 26  | Wuhan Pulmonary Hospital                                              |
| Wu C et al.       | 33 | 11 | 130 | 27  | Wuhan Jinyintan Hospital                                              |
| Xu B et al.       | 23 | 5  | 89  | 28  | Hubei Provincial Hospital of Traditional Chinese and Western Medicine |
| Yao Q et al.      | 10 | 2  | 74  | 22  | Huanggang Central Hospital                                            |
| Zhang J et al.    | 16 | 9  | 394 | 244 | Renmin Hospital of Wuhan University                                   |

**Table S19. Data of Association between Symptoms of Dyspnea and Mortality**

| Study             | a  | b  | c   | d   | Setting                             |
|-------------------|----|----|-----|-----|-------------------------------------|
| Chen T et al. (a) | 70 | 43 | 50  | 111 | Tongji Hospital                     |
| Du RH et al.      | 18 | 3  | 71  | 87  | Wuhan Pulmonary Hospital            |
| Wu C et al.       | 29 | 15 | 51  | 106 | Wuhan Jinyintan Hospital            |
| Xie J et al.      | 26 | 10 | 43  | 61  | Union Hospital                      |
| Yao Q et al.      | 6  | 6  | 9   | 87  | Huanggang Central Hospital          |
| Zhang J et al.    | 11 | 14 | 150 | 488 | Renmin Hospital of Wuhan University |

**Table S20. Data of Association between Symptoms of Chest Tightness and Mortality**

| Study             | a  | b  | c   | d   | Setting                             |
|-------------------|----|----|-----|-----|-------------------------------------|
| Chen T et al. (a) | 55 | 58 | 48  | 113 | Tongji Hospital                     |
| Zhang J et al.    | 6  | 19 | 148 | 490 | Renmin Hospital of Wuhan University |

**Table S21. Data of Association between Symptoms of Sputum Production and Mortality**

| Study             | a  | b  | c   | d   | Setting                             |
|-------------------|----|----|-----|-----|-------------------------------------|
| Chen T et al. (a) | 35 | 78 | 48  | 113 | Tongji Hospital                     |
| Du RH et al.      | 12 | 9  | 43  | 115 | Wuhan Pulmonary Hospital            |
| Wu C et al.       | 19 | 25 | 64  | 93  | Wuhan Jinyintan Hospital            |
| Yao Q et al.      | 5  | 7  | 29  | 67  | Huanggang Central Hospital          |
| Zhang J et al.    | 9  | 16 | 157 | 481 | Renmin Hospital of Wuhan University |

**Table S22. Data of Association between Symptoms of Fatigue and Mortality**

| Study             | a  | b  | c   | d   | Setting                                         |
|-------------------|----|----|-----|-----|-------------------------------------------------|
| Cao J et al.      | 9  | 8  | 47  | 38  | Zhongnan Hospital                               |
| Chen T et al. (a) | 64 | 49 | 73  | 88  | Tongji Hospital                                 |
| Zhang J et al.    | 9  | 16 | 199 | 439 | Renmin Hospital of Wuhan University             |
| Zhou F et al.     | 15 | 39 | 29  | 108 | Jinyintan Hospital and Wuhan Pulmonary Hospital |

**Table S23. Data of Association between Symptoms of Anorexia and Mortality**

| Study             | a  | b  | c  | d   | Setting                                                               |
|-------------------|----|----|----|-----|-----------------------------------------------------------------------|
| Chen T et al. (a) | 31 | 82 | 35 | 126 | Tongji Hospital                                                       |
| Wang L et al. (b) | 15 | 50 | 79 | 195 | Renmin Hospital of Wuhan University                                   |
| Xu B et al.       | 27 | 1  | 91 | 26  | Hubei Provincial Hospital of Traditional Chinese and Western Medicine |

**Table S24. Data of Association between Symptoms of Diarrhea and Mortality**

| Study             | a  | b  | c  | d   | Setting                                                               |
|-------------------|----|----|----|-----|-----------------------------------------------------------------------|
| Cao J et al.      | 3  | 14 | 8  | 77  | Zhongnan Hospital                                                     |
| Chen T et al. (a) | 27 | 86 | 50 | 111 | Tongji Hospital                                                       |
| Xu B et al.       | 6  | 22 | 28 | 89  | Hubei Provincial Hospital of Traditional Chinese and Western Medicine |
| Yao Q et al.      | 1  | 11 | 7  | 89  | Huanggang Central Hospital                                            |
| Zhang J et al.    | 0  | 25 | 61 | 577 | Renmin Hospital of Wuhan University                                   |
| Zhou F et al.     | 2  | 52 | 7  | 130 | Jinyintan Hospital and Wuhan Pulmonary Hospital                       |

**Table S25. Data of Association between Symptoms of Myalgia and Mortality**

| Study             | a  | b  | c  | d   | Setting                                                               |
|-------------------|----|----|----|-----|-----------------------------------------------------------------------|
| Cao J et al.      | 5  | 12 | 30 | 55  | Zhongnan Hospital                                                     |
| Chen T et al. (a) | 21 | 92 | 39 | 122 | Tongji Hospital                                                       |
| Xu B et al.       | 3  | 25 | 28 | 89  | Hubei Provincial Hospital of Traditional Chinese and Western Medicine |
| Zhang J et al.    | 0  | 25 | 63 | 575 | Renmin Hospital of Wuhan University                                   |
| Zhou F et al.     | 8  | 46 | 21 | 116 | Jinyintan Hospital and Wuhan Pulmonary Hospital                       |

**Table S26. Data of Association between Symptoms of Dizziness and Mortality**

| Study             | a  | b   | c  | d   | Setting                                                               |
|-------------------|----|-----|----|-----|-----------------------------------------------------------------------|
| Chen T et al. (a) | 10 | 103 | 11 | 150 | Tongji Hospital                                                       |
| Xu B et al.       | 5  | 23  | 10 | 107 | Hubei Provincial Hospital of Traditional Chinese and Western Medicine |
| Zhang J et al.    | 1  | 24  | 22 | 616 | Renmin Hospital of Wuhan University                                   |

**Table S27. Data of Association between Symptoms of Nausea and Mortality**

| Study             | a | b   | c  | d   | Setting                                                               |
|-------------------|---|-----|----|-----|-----------------------------------------------------------------------|
| Chen T et al. (a) | 8 | 105 | 16 | 145 | Tongji Hospital                                                       |
| Xu B et al.       | 7 | 21  | 11 | 106 | Hubei Provincial Hospital of Traditional Chinese and Western Medicine |
| Zhang J et al.    | 1 | 24  | 30 | 608 | Renmin Hospital of Wuhan University                                   |

**Table S28. Data of Association between Symptoms of Headache and Mortality**

| Study             | a  | b   | c  | d   | Setting                                                               |
|-------------------|----|-----|----|-----|-----------------------------------------------------------------------|
| Chen T et al. (a) | 11 | 102 | 20 | 141 | Tongji Hospital                                                       |
| Du RH et al.      | 5  | 16  | 12 | 146 | Wuhan Pulmonary Hospital                                              |
| Xu B et al.       | 1  | 27  | 5  | 112 | Hubei Provincial Hospital of Traditional Chinese and Western Medicine |
| Yao Q et al.      | 0  | 12  | 1  | 95  | Huanggang Central Hospital                                            |
| Zhang J et al.    | 0  | 25  | 20 | 618 | Renmin Hospital of Wuhan University                                   |

**Table S29. Data of Association between Symptoms of Vomiting and Mortality**

| Study             | a | b   | c  | d   | Setting                             |
|-------------------|---|-----|----|-----|-------------------------------------|
| Chen T et al. (a) | 6 | 107 | 10 | 151 | Tongji Hospital                     |
| Yang X et al. (b) | 1 | 31  | 1  | 19  | Wuhan Jin Yintan hospital           |
| Zhang J et al.    | 1 | 24  | 16 | 622 | Renmin Hospital of Wuhan University |

**Table S30. Data of Association between Symptoms of Pharyngalgia and Mortality**

| Study             | a | b   | c  | d   | Setting                                                               |
|-------------------|---|-----|----|-----|-----------------------------------------------------------------------|
| Chen T et al. (a) | 4 | 109 | 8  | 153 | Tongji Hospital                                                       |
| Wang L et al. (b) | 3 | 62  | 10 | 264 | Renmin Hospital of Wuhan University                                   |
| Xu B et al.       | 2 | 26  | 6  | 111 | Hubei Provincial Hospital of Traditional Chinese and Western Medicine |

**Table S31. Data of Association between Symptoms of Hemoptysis and Mortality**

| Study             | a | b   | c  | d   | Setting                  |
|-------------------|---|-----|----|-----|--------------------------|
| Chen T et al. (a) | 4 | 109 | 3  | 158 | Tongji Hospital          |
| Du RH et al.      | 0 | 21  | 10 | 148 | Wuhan Pulmonary Hospital |

**Table S32. Data of Association between Shock and Mortality**

| Study             | a  | b  | c | d   | Setting                             |
|-------------------|----|----|---|-----|-------------------------------------|
| Cao J et al.      | 7  | 10 | 3 | 82  | Zhongnan Hospital                   |
| Chen T et al. (a) | 46 | 67 | 0 | 161 | Tongji Hospital                     |
| Wang L et al. (b) | 3  | 62 | 5 | 269 | Renmin Hospital of Wuhan University |

**Table S33. Data of Association between Acute Infection and Mortality**

| Study             | a  | b  | c  | d   | Setting                                                               | Note                |
|-------------------|----|----|----|-----|-----------------------------------------------------------------------|---------------------|
| Cao J et al.      | 14 | 3  | 3  | 82  | Zhongnan Hospital                                                     | Acute infection     |
| Wang L et al. (b) | 49 | 16 | 94 | 180 | Renmin Hospital of Wuhan University                                   | Bacterial Infection |
| Xu B et al.       | 11 | 17 | 9  | 108 | Hubei Provincial Hospital of Traditional Chinese and Western Medicine | Bacterial infection |
| Zhou F et al.     | 27 | 27 | 1  | 136 | Jinyintan Hospital and Wuhan Pulmonary Hospital                       | Secondary infection |

**Table S34. Data of Association between Acute Kidney Injury and Mortality**

| Study               | a   | b   | c   | d    | Setting                                         |
|---------------------|-----|-----|-----|------|-------------------------------------------------|
| Cao J et al.        | 15  | 2   | 5   | 80   | Zhongnan Hospital                               |
| Chen T et al. (a)   | 28  | 85  | 1   | 160  | Tongji Hospital                                 |
| Richardson S et al. | 347 | 134 | 176 | 1693 | A total of 12 hospitals in the USA              |
| Wang L et al. (b)   | 17  | 48  | 11  | 263  | Renmin Hospital of Wuhan University             |
| Yao Q et al.        | 7   | 5   | 9   | 87   | Huanggang Central Hospital                      |
| Zhou F et al.       | 27  | 27  | 1   | 136  | Jinyintan Hospital and Wuhan Pulmonary Hospital |

**Table S35. Data of Association between Acute Cardiac Injury and Mortality**

| Study             | a  | b  | c  | d   | Setting                                         |
|-------------------|----|----|----|-----|-------------------------------------------------|
| Cao J et al.      | 12 | 5  | 3  | 82  | Zhongnan Hospital                               |
| Chen T et al. (a) | 72 | 22 | 18 | 91  | Tongji Hospital                                 |
| Guo T et al.      | 31 | 12 | 21 | 123 | Seventh Hospital of Wuhan City                  |
| Shi S et al.      | 42 | 15 | 40 | 319 | Renmin Hospital of Wuhan University             |
| Yao Q et al.      | 6  | 6  | 2  | 94  | Huanggang Central Hospital                      |
| Zhou F et al.     | 32 | 22 | 1  | 136 | Jinyintan Hospital and Wuhan Pulmonary Hospital |

**Table S36. Data of Association between Acute Respiratory Distress Syndrome and Mortality**

| Study             | a   | b | c  | d   | Setting                                         |
|-------------------|-----|---|----|-----|-------------------------------------------------|
| Cao J et al.      | 15  | 2 | 5  | 80  | Zhongnan Hospital                               |
| Chen T et al. (a) | 113 | 0 | 83 | 78  | Tongji Hospital                                 |
| Wang L et al. (b) | 56  | 9 | 15 | 259 | Renmin Hospital of Wuhan University             |
| Yao Q et al.      | 12  | 0 | 33 | 63  | Huanggang Central Hospital                      |
| Zhou F et al.     | 50  | 4 | 9  | 128 | Jinyintan Hospital and Wuhan Pulmonary Hospital |

**Table S37. Data of Association between Arrhythmia and Mortality**

| Study             | a  | b  | c  | d   | Setting                             |
|-------------------|----|----|----|-----|-------------------------------------|
| Cao J et al.      | 12 | 5  | 6  | 79  | Zhongnan Hospital                   |
| Wang L et al. (b) | 13 | 52 | 22 | 252 | Renmin Hospital of Wuhan University |

**Table S38. Data of Association between Heart Failure and Mortality**

| Study             | a  | b  | c  | d   | Setting                                         |
|-------------------|----|----|----|-----|-------------------------------------------------|
| Chen et al (a)    | 41 | 42 | 3  | 91  | Tongji Hospital                                 |
| Peng YD et al.    | 13 | 4  | 27 | 68  | Union Hospital                                  |
| Wang L et al. (b) | 25 | 40 | 33 | 241 | Renmin Hospital of Wuhan University             |
| Zhou F et al.     | 28 | 26 | 16 | 121 | Jinyintan Hospital and Wuhan Pulmonary Hospital |

**Table S39 Data of Association between Acute Liver Injury and Mortality**

| Study               | a  | b   | c  | d    | Setting                             |
|---------------------|----|-----|----|------|-------------------------------------|
| Cao J et al.        | 13 | 4   | 21 | 64   | Zhongnan Hospital                   |
| Chen T et al. (a)   | 10 | 103 | 3  | 158  | Tongji Hospital                     |
| Richardson S et al. | 53 | 498 | 3  | 2043 | A total of 12 hospitals in the USA  |
| Wang L et al. (b)   | 22 | 43  | 74 | 200  | Renmin Hospital of Wuhan University |
| Yang X et al. (b)   | 9  | 23  | 6  | 14   | Wuhan Jin Yintan hospital           |

**Table S40. Data of Association between Sepsis and Mortality**

| Study             | a   | b | c  | d  | Setting                                         |
|-------------------|-----|---|----|----|-------------------------------------------------|
| Chen T et al. (a) | 113 | 0 | 66 | 95 | Tongji Hospital                                 |
| Yao Q et al.      | 11  | 1 | 24 | 72 | Huanggang Central Hospital                      |
| Zhou F et al.     | 54  | 0 | 58 | 79 | Jinyintan Hospital and Wuhan Pulmonary Hospital |

**Table S41. Data of Association between Renal Replacement Therapy and Mortality**

| Study               | a  | b   | c | d    | Setting                                         |
|---------------------|----|-----|---|------|-------------------------------------------------|
| Cao J et al.        | 5  | 12  | 1 | 84   | Zhongnan Hospital                               |
| Chen T et al. (a)   | 3  | 110 | 0 | 161  | Tongji Hospital                                 |
| Richardson S et al. | 78 | 475 | 3 | 2078 | A total of 12 hospitals in the USA              |
| Yao Q et al.        | 1  | 11  | 0 | 96   | Huanggang Central Hospital                      |
| Zhou F et al.       | 10 | 44  | 0 | 137  | Jinyintan Hospital and Wuhan Pulmonary Hospital |

**Table S42. Data of Association between Invasive Mechanical Ventilation and Mortality**

| Study               | a   | b   | c  | d    | Setting                                                               |
|---------------------|-----|-----|----|------|-----------------------------------------------------------------------|
| Cao J et al.        | 12  | 5   | 2  | 83   | Zhongnan Hospital                                                     |
| Chen T et al. (a)   | 17  | 96  | 0  | 161  | Tongji Hospital                                                       |
| Richardson S et al. | 282 | 271 | 38 | 2043 | A total of 12 hospitals in the USA                                    |
| Wu C et al.         | 5   | 39  | 0  | 157  | Wuhan Jinyintan Hospital                                              |
| Xu B et al.         | 9   | 19  | 0  | 117  | Hubei Provincial Hospital of Traditional Chinese and Western Medicine |
| Yao Q et al.        | 10  | 2   | 0  | 96   | Huanggang Central Hospital                                            |



**Table S43. Data of Association between Noninvasive Ventilation and Mortality**

| Study             | a  | b  | c  | d   | Setting                                                               |
|-------------------|----|----|----|-----|-----------------------------------------------------------------------|
| Cao J et al.      | 3  | 14 | 2  | 83  | Zhongnan Hospital                                                     |
| Chen T et al. (a) | 76 | 37 | 26 | 135 | Tongji Hospital                                                       |
| Wu C et al.       | 38 | 6  | 23 | 134 | Wuhan Jinyintan Hospital                                              |
| Xu B et al.       | 13 | 15 | 9  | 108 | Hubei Provincial Hospital of Traditional Chinese and Western Medicine |
| Yao Q et al.      | 2  | 10 | 2  | 94  | Huanggang Central Hospital                                            |

**Table S44. Data of Association between High Flow Nasal Cannula and Mortality**

| Study             | a  | b  | c | d   | Setting                                                               |
|-------------------|----|----|---|-----|-----------------------------------------------------------------------|
| Chen T et al. (a) | 77 | 36 | 8 | 153 | Tongji Hospital                                                       |
| Xu B et al.       | 2  | 26 | 1 | 116 | Hubei Provincial Hospital of Traditional Chinese and Western Medicine |
| Yao et al         | 0  | 12 | 4 | 92  | Huanggang Central Hospital                                            |
| Zhou F et al.     | 33 | 21 | 8 | 129 | Jinyintan Hospital and Wuhan Pulmonary Hospital                       |

**Table S45. Data of Association between ECMO and Mortality**

| Study             | a | b   | c | d   | Setting                  |
|-------------------|---|-----|---|-----|--------------------------|
| Cao J et al.      | 1 | 16  | 2 | 83  | Zhongnan Hospital        |
| Chen T et al. (a) | 1 | 112 | 0 | 161 | Tongji Hospital          |
| Wu C et al.       | 1 | 43  | 0 | 157 | Wuhan Jinyintan Hospital |

**Table S46. Data of Association between Corticosteroid Therapy and Mortality**

| Study             | a  | b  | c   | d   | Setting                                                               |
|-------------------|----|----|-----|-----|-----------------------------------------------------------------------|
| Cao J et al.      | 11 | 6  | 40  | 45  | Zhongnan Hospital                                                     |
| Chen T et al. (a) | 99 | 14 | 118 | 43  | Tongji Hospital                                                       |
| Wu C et al.       | 23 | 21 | 39  | 118 | Wuhan Jinyintan Hospital                                              |
| Xu B et al.       | 24 | 4  | 63  | 54  | Hubei Provincial Hospital of Traditional Chinese and Western Medicine |
| Yao Q et al.      | 10 | 2  | 20  | 76  | Huanggang Central Hospital                                            |

**Table S47. Data of Association between Antibiotic Therapy and Mortality**

| Study             | a   | b | c   | d  | Setting                                                               |
|-------------------|-----|---|-----|----|-----------------------------------------------------------------------|
| Cao J et al.      | 17  | 0 | 84  | 1  | Zhongnan Hospital                                                     |
| Chen T et al. (a) | 105 | 8 | 144 | 17 | Tongji Hospital                                                       |
| Wu C et al.       | 43  | 1 | 153 | 4  | Wuhan Jinyintan Hospital                                              |
| Xu B et al.       | 28  | 0 | 92  | 25 | Hubei Provincial Hospital of Traditional Chinese and Western Medicine |
| Yao et al         | 12  | 0 | 36  | 60 | Huanggang Central Hospital                                            |

**Table S48. Data of Association between Immunoglobulin Therapy and Mortality**

| Study             | a  | b  | c  | d   | Setting                                                               |
|-------------------|----|----|----|-----|-----------------------------------------------------------------------|
| Cao J et al.      | 0  | 17 | 5  | 80  | Zhongnan Hospital                                                     |
| Chen T et al. (a) | 44 | 69 | 59 | 102 | Tongji Hospital                                                       |
| Xu B et al.       | 15 | 13 | 54 | 63  | Hubei Provincial Hospital of Traditional Chinese and Western Medicine |
| Yao et al         | 3  | 9  | 9  | 87  | Huanggang Central Hospital                                            |
| Zhou F et al.     | 36 | 18 | 10 | 127 | Jinyintan Hospital and Wuhan Pulmonary Hospital                       |

**Table S49. Data of Association between Antiviral Therapy and Mortality**

| Study             | a  | b  | c   | d  | Setting                    |
|-------------------|----|----|-----|----|----------------------------|
| Cao J et al.      | 17 | 0  | 83  | 2  | Zhongnan Hospital          |
| Chen T et al. (a) | 89 | 24 | 147 | 14 | Tongji Hospital            |
| Wu C et al.       | 25 | 19 | 145 | 12 | Wuhan Jinyintan Hospital   |
| Yao Q et al.      | 12 | 0  | 96  | 0  | Huanggang Central Hospital |

**Table S50. Data of White Blood Cell Count between Nonsurvivors and Survivors**

| Study             | Nonsurvivors |       |       | Survivors |      |       | Setting                                                               |
|-------------------|--------------|-------|-------|-----------|------|-------|-----------------------------------------------------------------------|
|                   | Mean         | SD    | Total | Mean      | SD   | Total |                                                                       |
| Chen T et al. (a) | 10           | 5.56  | 113   | 5         | 1.94 | 161   | Tongji Hospital                                                       |
| Chen T et al. (b) | 11.7         | 17.62 | 19    | 7.2       | 9.26 | 36    | Zhongnan Hospital                                                     |
| Du RH et al.      | 8.93         | 6.6   | 21    | 5.4       | 2.62 | 158   | Wuhan Pulmonary Hospital                                              |
| Wang L et al. (b) | 9.04         | 6.05  | 65    | 5.82      | 2.5  | 274   | Renmin Hospital of Wuhan University                                   |
| Wu C et al.       | 8.65         | 4.25  | 44    | 5.19      | 2.86 | 117   | Wuhan Jinyintan Hospital                                              |
| Xu B et al.       | 7.16         | 4.18  | 28    | 5.34      | 2.44 | 117   | Hubei Provincial Hospital of Traditional Chinese and Western Medicine |
| Yao Q et al.      | 9.67         | 4.47  | 12    | 5.91      | 5.12 | 13    | Huanggang Central Hospital                                            |

**Table S51. Data of Neutrophil Count between Nonsurvivors and Survivors**

| Study             | Nonsurvivors |       |       | Survivors |      |       | Setting                                                               |
|-------------------|--------------|-------|-------|-----------|------|-------|-----------------------------------------------------------------------|
|                   | Mean         | SD    | Total | Mean      | SD   | Total |                                                                       |
| Chen T et al. (a) | 9.03         | 5.48  | 113   | 3.37      | 1.57 | 161   | Tongji Hospital                                                       |
| Chen T et al. (b) | 9.5          | 15.22 | 19    | 6.1       | 9.26 | 36    | Zhongnan Hospital                                                     |
| Du RH et al.      | 7.4          | 6.76  | 21    | 4.2       | 2.62 | 158   | Wuhan Pulmonary Hospital                                              |
| Wang L et al. (b) | 7.91         | 5.6   | 65    | 4.2       | 2.49 | 274   | Renmin Hospital of Wuhan University                                   |
| Wu C et al.       | 7.73         | 4.18  | 44    | 3.55      | 2.65 | 117   | Wuhan Jinyintan Hospital                                              |
| Xu B et al.       | 5.93         | 3.96  | 28    | 3.69      | 2.21 | 117   | Hubei Provincial Hospital of Traditional Chinese and Western Medicine |
| Yao Q et al.      | 6.53         | 5.26  | 12    | 3.46      | 2.56 | 13    | Huanggang Central Hospital                                            |

**Table S52. Data of Lymphocyte Count between Nonsurvivors and Survivors**

| Study             | Nonsurvivors |      |       | Survivors |      |       | Setting                                                               |
|-------------------|--------------|------|-------|-----------|------|-------|-----------------------------------------------------------------------|
|                   | Mean         | SD   | Total | Mean      | SD   | Total |                                                                       |
| Chen T et al. (a) | 0.57         | 0.23 | 113   | 1.03      | 0.52 | 161   | Tongji Hospital                                                       |
| Chen T et al. (b) | 2.33         | 4.81 | 19    | 0.93      | 1.54 | 36    | Zhongnan Hospital                                                     |
| Du RH et al.      | 0.67         | 0.24 | 21    | 0.83      | 0.37 | 158   | Wuhan Pulmonary Hospital                                              |
| Wang L et al. (b) | 0.6          | 0.34 | 65    | 1.01      | 0.51 | 274   | Renmin Hospital of Wuhan University                                   |
| Wu C et al.       | 0.6          | 0.2  | 44    | 1.08      | 0.55 | 117   | Wuhan Jinyintan Hospital                                              |
| Xu B et al.       | 0.61         | 0.48 | 28    | 0.98      | 0.54 | 117   | Hubei Provincial Hospital of Traditional Chinese and Western Medicine |
| Yao Q et al.      | 0.99         | 0.80 | 12    | 0.79      | 0.26 | 13    | Huanggang Central Hospital                                            |

**Table S53. Data of Monocyte Count between Nonsurvivors and Survivors**

| Study             | Nonsurvivors |      |       | Survivors |      |       | Setting                                                               |
|-------------------|--------------|------|-------|-----------|------|-------|-----------------------------------------------------------------------|
|                   | Mean         | SD   | Total | Mean      | SD   | Total |                                                                       |
| Chen T et al. (a) | 0.4          | 0.3  | 113   | 0.4       | 0.15 | 161   | Tongji Hospital                                                       |
| Wang L et al. (b) | 0.34         | 0.2  | 65    | 0.45      | 0.24 | 274   | Renmin Hospital of Wuhan University                                   |
| Wu C et al.       | 0.3          | 0.19 | 44    | 0.34      | 0.14 | 117   | Wuhan Jinyintan Hospital                                              |
| Xu B et al.       | 0.32         | 0.18 | 28    | 0.41      | 0.19 | 117   | Hubei Provincial Hospital of Traditional Chinese and Western Medicine |

**Table S54. Data of Platelet Count between Nonsurvivors and Survivors**

| Study             | Nonsurvivors |        |       | Survivors |        |       | Setting                             |
|-------------------|--------------|--------|-------|-----------|--------|-------|-------------------------------------|
|                   | Mean         | SD     | Total | Mean      | SD     | Total |                                     |
| Chen T et al. (b) | 134.67       | 144.17 | 19    | 205.33    | 302.65 | 36    | Zhongnan Hospital                   |
| Tang N et al. (a) | 178          | 92     | 134   | 231       | 99     | 315   | Tongji Hospital                     |
| Wang L et al. (b) | 164.67       | 87.95  | 65    | 212.67    | 81.23  | 274   | Renmin Hospital of Wuhan University |
| Wu C et al.       | 167.83       | 92.35  | 44    | 185.83    | 74.69  | 117   | Wuhan Jinyintan Hospital            |
| Yao Q et al.      | 165.33       | 52.83  | 12    | 149.67    | 68.11  | 13    | Huanggang Central Hospital          |

**Table S55. Data of Hemoglobin between Nonsurvivors and Survivors**

| Study             | Nonsurvivors |       |       | Survivors |       |       | Setting                                         |
|-------------------|--------------|-------|-------|-----------|-------|-------|-------------------------------------------------|
|                   | Mean         | SD    | Total | Mean      | SD    | Total |                                                 |
| Chen T et al. (a) | 129          | 23.28 | 113   | 128       | 14.96 | 161   | Renmin Hospital                                 |
| Wang L et al. (b) | 121.67       | 23.5  | 65    | 120       | 14.16 | 274   | Renmin Hospital of Wuhan University             |
| Yao Q et al.      | 126.33       | 9.22  | 12    | 120.67    | 12.46 | 13    | Huanggang Central Hospital                      |
| Zhou F et al.     | 126.33       | 17.52 | 54    | 129.33    | 14.98 | 137   | Jinyintan Hospital and Wuhan Pulmonary Hospital |

**Table S56. Data of Albumin between Nonsurvivors and Survivors**

| Study             | Nonsurvivors |       |       | Survivors |       |       | Setting                    |
|-------------------|--------------|-------|-------|-----------|-------|-------|----------------------------|
|                   | Mean         | SD    | Total | Mean      | SD    | Total |                            |
| Chen T et al. (a) | 30.33        | 3.83  | 113   | 36.5      | 4.34  | 161   | Tongji Hospital            |
| Chen T et al. (b) | 32.67        | 12.01 | 19    | 34        | 13.13 | 36    | Zhongnan Hospital          |
| Du RH et al.      | 33.33        | 3.5   | 21    | 33.9      | 5.61  | 158   | Wuhan Pulmonary Hospital   |
| Wu C et al.       | 28.95        | 4.1   | 44    | 33.65     | 4.02  | 117   | Wuhan Jinyintan Hospital   |
| Yao Q et al.      | 31.07        | 5.03  | 12    | 37.17     | 3.99  | 13    | Huanggang Central Hospital |

**Table S57. Data of Total Bilirubin between Nonsurvivors and Survivors**

| Study             | Nonsurvivors |       |       | Survivors |      |       | Setting                    |
|-------------------|--------------|-------|-------|-----------|------|-------|----------------------------|
|                   | Mean         | SD    | Total | Mean      | SD   | Total |                            |
| Chen T et al. (a) | 12.9         | 5.48  | 113   | 8.47      | 4.04 | 161   | Tongji Hospital            |
| Du RH et al.      | 11.4         | 6.36  | 21    | 9.17      | 4.34 | 158   | Wuhan Pulmonary Hospital   |
| Wu C et al.       | 14.88        | 7.24  | 44    | 10.92     | 3.79 | 117   | Wuhan Jinyintan Hospital   |
| Yao Q et al.      | 12.93        | 11.82 | 12    | 12.03     | 5.48 | 13    | Huanggang Central Hospital |

**Table S58. Data of ALT between Nonsurvivors and Survivors**

| Study             | Nonsurvivors |       |       | Survivors |        |       | Setting                                                               |
|-------------------|--------------|-------|-------|-----------|--------|-------|-----------------------------------------------------------------------|
|                   | Mean         | SD    | Total | Mean      | SD     | Total |                                                                       |
| Chen T et al. (a) | 31           | 21.78 | 113   | 22.27     | 12.87  | 161   | Tongji Hospital                                                       |
| Chen T et al. (b) | 49.33        | 62.48 | 19    | 109       | 209.23 | 36    | Zhongnan Hospital                                                     |
| Du RH et al.      | 28           | 13.52 | 21    | 25.5      | 19.83  | 158   | Wuhan Pulmonary Hospital                                              |
| Wang L et al. (b) | 30.67        | 22.74 | 65    | 29.33     | 19.38  | 274   | Renmin Hospital of Wuhan University                                   |
| Wu C et al.       | 37.33        | 24.52 | 44    | 28.83     | 17.64  | 117   | Wuhan Jinyintan Hospital                                              |
| Xu B et al.       | 29.5         | 26.56 | 28    | 24.67     | 21.77  | 117   | Hubei Provincial Hospital of Traditional Chinese and Western Medicine |
| Yao Q et al.      | 20.67        | 4.61  | 12    | 22.77     | 8.06   | 13    | Huanggang Central Hospital                                            |

**Table S59. Data of AST between Nonsurvivors and Survivors**

| Study             | Nonsurvivors |        |       | Survivors |        |       | Setting                                                               |
|-------------------|--------------|--------|-------|-----------|--------|-------|-----------------------------------------------------------------------|
|                   | Mean         | SD     | Total | Mean      | SD     | Total |                                                                       |
| Chen T et al. (a) | 47.67        | 27.03  | 113   | 26.1      | 9.95   | 161   | Tongji Hospital                                                       |
| Chen T et al. (b) | 88           | 120.15 | 19    | 94.67     | 145.92 | 36    | Zhongnan Hospital                                                     |
| Du RH et al.      | 42.83        | 27.43  | 21    | 29.5      | 17.21  | 158   | Wuhan Pulmonary Hospital                                              |
| Wang L et al. (b) | 47           | 28.81  | 65    | 31.33     | 15.65  | 274   | Renmin Hospital of Wuhan University                                   |
| Wu C et al.       | 39.67        | 16.86  | 44    | 30.83     | 10.88  | 117   | Wuhan Jinyintan Hospital                                              |
| Xu B et al.       | 40           | 24.61  | 28    | 25.67     | 12.76  | 117   | Hubei Provincial Hospital of Traditional Chinese and Western Medicine |

**Table S60. Data of Creatinine between Nonsurvivors and Survivors**

| Study             | Nonsurvivors |       |       | Survivors |        |       | Setting                                                               |
|-------------------|--------------|-------|-------|-----------|--------|-------|-----------------------------------------------------------------------|
|                   | Mean         | SD    | Total | Mean      | SD     | Total |                                                                       |
| Chen T et al. (a) | 89.33        | 36.05 | 113   | 68        | 22.44  | 161   | Tongji Hospital                                                       |
| Chen T et al. (b) | 328          | 579.9 | 19    | 270.33    | 500.31 | 36    | Zhongnan Hospital                                                     |
| Du RH et al.      | 90           | 38.96 | 21    | 66.67     | 18.7   | 158   | Wuhan Pulmonary Hospital                                              |
| Wang L et al. (b) | 83           | 44.73 | 65    | 60        | 16.4   | 274   | Renmin Hospital of Wuhan University                                   |
| Wu C et al.       | 72.38        | 22.42 | 44    | 69.07     | 17.71  | 117   | Wuhan Jinyintan Hospital                                              |
| Xu B et al.       | 89.82        | 24.84 | 28    | 70.5      | 21.32  | 117   | Hubei Provincial Hospital of Traditional Chinese and Western Medicine |
| Yao Q et al.      | 91.93        | 30.11 | 12    | 66.20     | 25.42  | 13    | Huanggang Central Hospital                                            |

**Table S61. Data of Blood Urea Nitrogen between Nonsurvivors and Survivors**

| Study             | Nonsurvivors |      |       | Survivors |      |       | Setting                                                               |
|-------------------|--------------|------|-------|-----------|------|-------|-----------------------------------------------------------------------|
|                   | Mean         | SD   | Total | Mean      | SD   | Total |                                                                       |
| Chen T et al. (a) | 8.90         | 5.18 | 113   | 4.03      | 1.57 | 161   | Tongji Hospital                                                       |
| Xu B et al.       | 7.67         | 3.77 | 28    | 4.81      | 1.87 | 117   | Hubei Provincial Hospital of Traditional Chinese and Western Medicine |

**Table S62. Data of Urea between Nonsurvivors and Survivors**

| Study             | Nonsurvivors |      |       | Survivors |      |       | Setting                             |
|-------------------|--------------|------|-------|-----------|------|-------|-------------------------------------|
|                   | Mean         | SD   | Total | Mean      | SD   | Total |                                     |
| Wang L et al. (b) | 9.7          | 6.22 | 65    | 5.33      | 2.31 | 274   | Renmin Hospital of Wuhan University |
| Wu C et al.       | 7.08         | 2.8  | 44    | 4.37      | 1.5  | 117   | Wuhan Jinyintan Hospital            |

**Table S63. Data of Prothrombin Time between Nonsurvivors and Survivors**

| Study             | Nonsurvivors |      |       | Survivors |      |       | Setting                                                               |
|-------------------|--------------|------|-------|-----------|------|-------|-----------------------------------------------------------------------|
|                   | Mean         | SD   | Total | Mean      | SD   | Total |                                                                       |
| Du RH et al.      | 14.17        | 3.18 | 21    | 13.77     | 2.09 | 158   | Wuhan Pulmonary Hospital                                              |
| Tang N et al. (a) | 16.5         | 8.4  | 134   | 14.6      | 2.1  | 315   | Tongji Hospital                                                       |
| Wang L et al. (b) | 12.97        | 1.67 | 65    | 12.07     | 0.75 | 274   | Renmin Hospital of Wuhan University                                   |
| Wu C et al.       | 11.72        | 1.03 | 44    | 10.73     | 1.05 | 117   | Wuhan Jinyintan Hospital                                              |
| Xu B et al.       | 13.65        | 1.68 | 28    | 12.57     | 1.13 | 117   | Hubei Provincial Hospital of Traditional Chinese and Western Medicine |

**Table S64. Data of APTT between Nonsurvivors and Survivors**

| Study             | Nonsurvivors |      |       | Survivors |      |       | Setting                             |
|-------------------|--------------|------|-------|-----------|------|-------|-------------------------------------|
|                   | Mean         | SD   | Total | Mean      | SD   | Total |                                     |
| Chen T et al. (a) | 41.03        | 8.49 | 113   | 40.63     | 5.31 | 161   | Tongji Hospital                     |
| Du RH et al.      | 36.7         | 8.51 | 21    | 35.1      | 6.14 | 158   | Wuhan Pulmonary Hospital            |
| Wang L et al. (b) | 29.43        | 3.34 | 65    | 28.37     | 4.17 | 274   | Renmin Hospital of Wuhan University |
| Wu C et al.       | 24.9         | 4.67 | 44    | 29.38     | 5.48 | 117   | Wuhan Jinyintan Hospital            |

**Table S65. Data of C-reactive Protein between Nonsurvivors and Survivors**

| Study             | Nonsurvivors |        |       | Survivors |        |       | Setting                                                               |
|-------------------|--------------|--------|-------|-----------|--------|-------|-----------------------------------------------------------------------|
|                   | Mean         | SD     | Total | Mean      | SD     | Total |                                                                       |
| Chen T et al. (a) | 116.83       | 74.57  | 113   | 30.23     | 35.23  | 161   | Tongji Hospital                                                       |
| Chen T et al. (b) | 146.33       | 217.86 | 19    | 70.33     | 115.04 | 36    | Zhongnan Hospital                                                     |
| Du RH et al.      | 76.6         | 53.74  | 21    | 48.77     | 53.64  | 158   | Wuhan Pulmonary Hospital                                              |
| Wang L et al. (b) | 116.1        | 97.42  | 65    | 46.63     | 51.2   | 274   | Renmin Hospital of Wuhan University                                   |
| Wu C et al.       | 98.47        | 88.48  | 44    | 29.28     | 38.39  | 117   | Wuhan Jinyintan Hospital                                              |
| Xu B et al.       | 88.65        | 54.54  | 28    | 24.11     | 35.53  | 117   | Hubei Provincial Hospital of Traditional Chinese and Western Medicine |
| Yao Q et al.      | 38.33        | 12.33  | 12    | 25.57     | 15.61  | 13    | Huanggang Central Hospital                                            |

**Table S66. Data of D-dimer between Nonsurvivors and Survivors**

| Study             | Nonsurvivors |       |       | Survivors |       |       | Setting                                                               |
|-------------------|--------------|-------|-------|-----------|-------|-------|-----------------------------------------------------------------------|
|                   | Mean         | SD    | Total | Mean      | SD    | Total |                                                                       |
| Chen T et al. (b) | 5.6          | 12.04 | 19    | 6.73      | 14.45 | 36    | Zhongnan Hospital                                                     |
| Du RH et al.      | 4            | 8.03  | 21    | 0.67      | 0.67  | 158   | Wuhan Pulmonary Hospital                                              |
| Tang N et al. (a) | 9.04         | 14.67 | 134   | 2.14      | 2.52  | 315   | Tongji Hospital                                                       |
| Wang L et al. (b) | 7.57         | 11.9  | 65    | 1.22      | 1.14  | 274   | Renmin Hospital of Wuhan University                                   |
| Wu C et al.       | 5.35         | 7.52  | 44    | 0.59      | 0.45  | 117   | Wuhan Jinyintan Hospital                                              |
| Xu B et al.       | 7.03         | 14.49 | 28    | 0.62      | 0.46  | 117   | Hubei Provincial Hospital of Traditional Chinese and Western Medicine |
| Yao Q et al.      | 33.41        | 66.12 | 12    | 1.94      | 1.40  | 13    | Huanggang Central Hospital                                            |

**Table S67. Data of Procalcitonin between Nonsurvivors and Survivors**

| Study             | Nonsurvivors |      |       | Survivors |       |       | Setting                                                               |
|-------------------|--------------|------|-------|-----------|-------|-------|-----------------------------------------------------------------------|
|                   | Mean         | SD   | Total | Mean      | SD    | Total |                                                                       |
| Chen T et al. (a) | 0.37         | 0.38 | 113   | 0.05      | 0.04  | 161   | Tongji Hospital                                                       |
| Chen T et al. (b) | 3.08         | 6.41 | 19    | 0.36      | 0.77  | 36    | Zhongnan Hospital                                                     |
| Wang L et al. (b) | 0.49         | 0.77 | 65    | 0.08      | 0.07  | 274   | Renmin Hospital of Wuhan University                                   |
| Xu B et al.       | 0.25         | 0.32 | 28    | 0.04      | 0.04  | 117   | Hubei Provincial Hospital of Traditional Chinese and Western Medicine |
| Yao Q et al.      | 2.75         | 4.75 | 12    | 0.25      | 0.25  | 13    | Huanggang Central Hospital                                            |
| Zhou F et al.     | 0.23         | 0.30 | 54    | 0.1       | 0.001 | 137   | Jinyintan Hospital and Wuhan Pulmonary Hospital                       |

**Table S68. Data of Ferritin between Nonsurvivors and Survivors**

| Study             | Nonsurvivors |         |       | Survivors |         |       | Setting                  |
|-------------------|--------------|---------|-------|-----------|---------|-------|--------------------------|
|                   | Mean         | SD      | Total | Mean      | SD      | Total |                          |
| Chen T et al. (a) | 1.5233       | 0.99184 | 113   | 0.53927   | 0.45362 | 161   | Tongji Hospital          |
| Wu C et al.       | 1.21854      | 1.10402 | 44    | 0.46135   | 0.35948 | 117   | Wuhan Jinyintan Hospital |

**Table S69. Data of Lactate Dehydrogenase between Nonsurvivors and Survivors**

| Study             | Nonsurvivors |        |       | Survivors |        |       | Setting                             |
|-------------------|--------------|--------|-------|-----------|--------|-------|-------------------------------------|
|                   | Mean         | SD     | Total | Mean      | SD     | Total |                                     |
| Chen T et al. (a) | 570.43       | 213.87 | 113   | 266.27    | 76.45  | 161   | Tongji Hospital                     |
| Chen T et al. (b) | 468.67       | 498.20 | 19    | 383.00    | 320.41 | 36    | Zhongnan Hospital                   |
| Wang L et al. (b) | 480.67       | 214.56 | 65    | 287       | 100.61 | 274   | Renmin Hospital of Wuhan University |
| Wu C et al.       | 467.83       | 166.68 | 44    | 262.83    | 82.19  | 117   | Wuhan Jinyintan Hospital            |

**Table S70. Data of Creatine Kinase between Nonsurvivors and Survivors**

| Study             | Nonsurvivors |        |       | Survivors |        |       | Setting                                                               |
|-------------------|--------------|--------|-------|-----------|--------|-------|-----------------------------------------------------------------------|
|                   | Mean         | SD     | Total | Mean      | SD     | Total |                                                                       |
| Chen T et al. (a) | 219.33       | 210.26 | 113   | 91.7      | 66.95  | 161   | Tongji Hospital                                                       |
| Chen T et al. (b) | 406.33       | 751.31 | 19    | 125.67    | 189.16 | 36    | Zhongnan Hospital                                                     |
| Wang L et al. (b) | 118.67       | 130.4  | 65    | 60        | 16.4   | 274   | Renmin Hospital of Wuhan University                                   |
| Xu B et al.       | 142.33       | 65.62  | 28    | 86.17     | 67.18  | 117   | Hubei Provincial Hospital of Traditional Chinese and Western Medicine |
| Yao Q et al.      | 97.70        | 52.16  | 12    | 106.17    | 85.96  | 13    | Huanggang Central Hospital                                            |
| Zhou F et al.     | 69.83        | 100.16 | 54    | 27.53     | 29.67  | 137   | Jinyintan Hospital and Wuhan Pulmonary Hospital                       |

**Table S71. Data of  $\gamma$ -glutamyl Transpeptidase between Nonsurvivors and Survivors**

| Study             | Nonsurvivors |       |       | Survivors |       |       | Setting                  |
|-------------------|--------------|-------|-------|-----------|-------|-------|--------------------------|
|                   | Mean         | SD    | Total | Mean      | SD    | Total |                          |
| Chen T et al. (a) | 46.33        | 32.29 | 113   | 30.77     | 19.67 | 161   | Tongji Hospital          |
| Du RH et al.      | 27.17        | 20.27 | 21    | 33.5      | 28.06 | 158   | Wuhan Pulmonary Hospital |

**Table S72. Data of ESR between Nonsurvivors and Survivors**

| Study             | Nonsurvivors |       |       | Survivors |       |       | Setting                  |
|-------------------|--------------|-------|-------|-----------|-------|-------|--------------------------|
|                   | Mean         | SD    | Total | Mean      | SD    | Total |                          |
| Chen T et al. (a) | 40.6         | 31.76 | 113   | 29.6      | 21.84 | 161   | Tongji Hospital          |
| Chen T et al. (b) | 50           | 69.68 | 19    | 49.67     | 64.08 | 36    | Zhongnan Hospital        |
| Wu C et al.       | 57.17        | 25.29 | 44    | 50.67     | 18.24 | 117   | Wuhan Jinyintan Hospital |

**Table S73. Data of Creatine Kinase-MB between Nonsurvivors and Survivors**

| Study             | Nonsurvivors |       |       | Survivors |      |       | Setting                                                               |
|-------------------|--------------|-------|-------|-----------|------|-------|-----------------------------------------------------------------------|
|                   | Mean         | SD    | Total | Mean      | SD   | Total |                                                                       |
| Wang L et al. (b) | 2.85         | 2.27  | 65    | 1.29      | 0.82 | 274   | Renmin Hospital of Wuhan University                                   |
| Wu C et al.       | 16.67        | 5.36  | 44    | 15.33     | 5.25 | 117   | Wuhan Jinyintan Hospital                                              |
| Xu B et al.       | 20.83        | 10.55 | 28    | 13.67     | 6.00 | 117   | Hubei Provincial Hospital of Traditional Chinese and Western Medicine |
| Yao Q et al.      | 22.57        | 11.32 | 12    | 13.83     | 4.57 | 13    | Huanggang Central Hospital                                            |

**Table S74. Data of NT-proBNP between Nonsurvivors and Survivors**

| Study             | Nonsurvivors |         |       | Survivors |         |       | Setting                             |
|-------------------|--------------|---------|-------|-----------|---------|-------|-------------------------------------|
|                   | Mean         | SD      | Total | Mean      | SD      | Total |                                     |
| Chen T et al. (a) | 1.00243      | 1.07212 | 113   | 0.09233   | 0.12343 | 161   | Tongji Hospital                     |
| Wang L et al. (a) | 0.86433      | 1.09733 | 33    | 0.15733   | 0.18918 | 169   | Renmin Hospital of Wuhan University |

**Table S75. Data of hs-cTnI between Nonsurvivors and Survivors**

| Study             | Nonsurvivors |        |       | Survivors |      |       | Setting                                         |
|-------------------|--------------|--------|-------|-----------|------|-------|-------------------------------------------------|
|                   | Mean         | SD     | Total | Mean      | SD   | Total |                                                 |
| Chen T et al. (a) | 71.10        | 107.46 | 113   | 4.07      | 3.82 | 161   | Tongji Hospital                                 |
| Wang L et al. (b) | 144          | 237.3  | 65    | 10.33     | 8.94 | 274   | Renmin Hospital of Wuhan University             |
| Zhou F et al.     | 36.97        | 59.03  | 54    | 3.2       | 3.3  | 137   | Jinyintan Hospital and Wuhan Pulmonary Hospital |

**Table S76. Data of Myoglobin between Nonsurvivors and Survivors**

| Study             | Nonsurvivors |        |       | Survivors |       |       | Setting                             |
|-------------------|--------------|--------|-------|-----------|-------|-------|-------------------------------------|
|                   | Mean         | SD     | Total | Mean      | SD    | Total |                                     |
| Du RH et al.      | 184.43       | 233.98 | 21    | 36.03     | 33.52 | 158   | Wuhan Pulmonary Hospital            |
| Wang L et al. (a) | 243.5        | 374.69 | 33    | 37.7      | 20.79 | 169   | Renmin Hospital of Wuhan University |

**Table S77. Data of Cystatin C between Nonsurvivors and Survivors**

| Study        | Nonsurvivors |      |       | Survivors |      |       | Setting                    |
|--------------|--------------|------|-------|-----------|------|-------|----------------------------|
|              | Mean         | SD   | Total | Mean      | SD   | Total |                            |
| Wu C et al.  | 1.11         | 0.44 | 44    | 0.83      | 0.16 | 117   | Wuhan Jinyintan Hospital   |
| Yao Q et al. | 2.55         | 2.98 | 12    | 1.53      | 0.51 | 13    | Huanggang Central Hospital |

**Table S78. Data of Interleukin-6 between Nonsurvivors and Survivors**

| Study             | Nonsurvivors |        |       | Survivors |        |       | Setting                                                               |
|-------------------|--------------|--------|-------|-----------|--------|-------|-----------------------------------------------------------------------|
|                   | Mean         | SD     | Total | Mean      | SD     | Total |                                                                       |
| Chen T et al. (a) | 84.8         | 83.5   | 113   | 14.4      | 16.61  | 161   | Tongji Hospital                                                       |
| Chen T et al. (b) | 212.67       | 330.80 | 19    | 116       | 216.95 | 36    | Zhongnan Hospital                                                     |
| Wang L et al. (b) | 104          | 110.99 | 65    | 11.4      | 10.36  | 274   | Renmin Hospital of Wuhan University                                   |
| Wu C et al.       | 10.74        | 5.7    | 44    | 6.49      | 1.85   | 117   | Wuhan Jinyintan Hospital                                              |
| Xu B et al.       | 36.1         | 38.5   | 28    | 15.3      | 17.08  | 117   | Hubei Provincial Hospital of Traditional Chinese and Western Medicine |

**Table S79. Data of CD3+ Cell Count between Nonsurvivors and Survivors**

| Study       | Nonsurvivors |        |       | Survivors |        |       | Setting                                                               |
|-------------|--------------|--------|-------|-----------|--------|-------|-----------------------------------------------------------------------|
|             | Mean         | SD     | Total | Mean      | SD     | Total |                                                                       |
| Wu C et al. | 311.33       | 173.20 | 44    | 648.67    | 284.48 | 117   | Wuhan Jinyintan Hospital                                              |
| Xu B et al. | 163.33       | 106.63 | 28    | 462.33    | 262.71 | 117   | Hubei Provincial Hospital of Traditional Chinese and Western Medicine |



**Table S80. Data of CD4+ Cell Count between Nonsurvivors and Survivors**

| Study             | Nonsurvivors |        |       | Survivors |        |       | Setting                                                               |
|-------------------|--------------|--------|-------|-----------|--------|-------|-----------------------------------------------------------------------|
|                   | Mean         | SD     | Total | Mean      | SD     | Total |                                                                       |
| Wang L et al. (b) | 193.33       | 132.68 | 65    | 360.67    | 222.83 | 274   | Renmin Hospital of Wuhan University                                   |
| Wu C et al.       | 202.33       | 141.01 | 44    | 408.67    | 216.93 | 117   | Wuhan Jinyintan Hospital                                              |
| Xu B et al.       | 97.42        | 68.94  | 28    | 249.67    | 131.36 | 117   | Hubei Provincial Hospital of Traditional Chinese and Western Medicine |

**Table S81. Data of CD8+ Cell Count between Nonsurvivors and Survivors**

| Study             | Nonsurvivors |       |       | Survivors |        |       | Setting                                                               |
|-------------------|--------------|-------|-------|-----------|--------|-------|-----------------------------------------------------------------------|
|                   | Mean         | SD    | Total | Mean      | SD     | Total |                                                                       |
| Wang L et al. (b) | 91.67        | 89.46 | 65    | 199.67    | 149.8  | 274   | Renmin Hospital of Wuhan University                                   |
| Wu C et al.       | 102.17       | 58.63 | 44    | 241       | 123.1  | 117   | Wuhan Jinyintan Hospital                                              |
| Xu B et al.       | 70.33        | 56.24 | 28    | 171.33    | 122.35 | 117   | Hubei Provincial Hospital of Traditional Chinese and Western Medicine |

**Table S82. Data of Association between Increased White Blood Cell Count ( $\geq 10 \times 10^9/L$ ) and Mortality**

| Study             | a  | b  | c  | d   | Setting                                         |
|-------------------|----|----|----|-----|-------------------------------------------------|
| Chen T et al. (a) | 56 | 57 | 6  | 155 | Tongji Hospital                                 |
| Chen T et al. (b) | 4  | 15 | 6  | 30  | Zhongnan Hospital                               |
| Yao Q et al.      | 9  | 3  | 3  | 93  | Dabieshan Medical Center                        |
| Zhou F et al.     | 25 | 29 | 15 | 122 | Jinyintan Hospital and Wuhan Pulmonary Hospital |

**Table S83. Data of Association between Decreased Lymphocyte Count ( $< 0.8 \times 10^9/L$ ) and Mortality**

| Study             | a  | b  | c  | d   | Setting                                         |
|-------------------|----|----|----|-----|-------------------------------------------------|
| Chen T et al. (a) | 87 | 26 | 48 | 113 | Tongji Hospital                                 |
| Yao Q et al.      | 5  | 7  | 18 | 78  | Dabieshan Medical Center                        |
| Zhou F et al.     | 41 | 13 | 36 | 101 | Jinyintan Hospital and Wuhan Pulmonary Hospital |

**Table S84. Data of Association between Decreased Lymphocyte Count ( $< 1.1 \times 10^9/L$ ) and Mortality**

| Study        | a  | b | c   | d  | Setting                  |
|--------------|----|---|-----|----|--------------------------|
| Cao J et al. | 11 | 6 | 54  | 31 | Zhongnan Hospital        |
| Du RH et al. | 19 | 2 | 114 | 44 | Wuhan Pulmonary Hospital |

**Table S85. Data of Association between Decreased Platelet Count ( $< 100 \times 10^9/L$ ) and Mortality**

| Study             | a  | b  | c | d   | Setting                                         |
|-------------------|----|----|---|-----|-------------------------------------------------|
| Chen T et al. (b) | 5  | 14 | 4 | 32  | Zhongnan Hospital                               |
| Yao Q et al.      | 1  | 11 | 9 | 87  | Dabieshan Medical Center                        |
| Zhou F et al.     | 11 | 43 | 2 | 135 | Jinyintan Hospital and Wuhan Pulmonary Hospital |

**Table S86. Data of Association between Decreased Platelet Count ( $<125 \times 10^9/L$ ) and Mortality**

| Study             | a   | b  | c   | d    | Setting                   |
|-------------------|-----|----|-----|------|---------------------------|
| Liu Y et al. (b)  | 21  | 28 | 47  | 287  | Central Hospital of Wuhan |
| Yang X et al. (a) | 173 | 65 | 133 | 1105 | Jinyintan Hospital        |

**Table S87. Data of Association between Increased ALT ( $>40$  U/L) and Mortality**

| Study             | a  | b  | c  | d   | Setting                                         |
|-------------------|----|----|----|-----|-------------------------------------------------|
| Cao J et al.      | 7  | 10 | 18 | 66  | Zhongnan Hospital                               |
| Chen T et al. (a) | 30 | 83 | 30 | 131 | Tongji Hospital                                 |
| Zhou F et al.     | 26 | 28 | 33 | 102 | Jinyintan Hospital and Wuhan Pulmonary Hospital |

**Table S88. Data of Association between Increased AST ( $>40$  U/L) and Mortality**

| Study             | a  | b  | c  | d   | Setting                  |
|-------------------|----|----|----|-----|--------------------------|
| Chen T et al. (a) | 59 | 54 | 25 | 136 | Tongji Hospital          |
| Chen T et al. (b) | 14 | 5  | 18 | 18  | Zhongnan Hospital        |
| Du RH et al.      | 10 | 11 | 47 | 111 | Wuhan Pulmonary Hospital |

**Table S89. Data of Association between Increased Creatinine ( $>133 \mu\text{mol/L}$ ) and Mortality**

| Study         | a | b  | c | d   | Setting                                         |
|---------------|---|----|---|-----|-------------------------------------------------|
| Yao Q et al.  | 1 | 11 | 3 | 93  | Dabieshan Medical Center                        |
| Zhou F et al. | 5 | 49 | 3 | 129 | Jinyintan Hospital and Wuhan Pulmonary Hospital |

**Table S90. Data of Association between Increased Procalcitonin ( $\geq 0.5$  ng/mL) and Mortality**

| Study             | a  | b  | c | d   | Setting                                         |
|-------------------|----|----|---|-----|-------------------------------------------------|
| Chen T et al. (a) | 35 | 61 | 3 | 137 | Tongji Hospital                                 |
| Zhou F et al.     | 13 | 38 | 1 | 112 | Jinyintan Hospital and Wuhan Pulmonary Hospital |

**Table S91. Data of Association between Increased Procalcitonin ( $\geq 0.1$  ng/mL) and Mortality**

| Study         | a  | b  | c  | d  | Setting                                         |
|---------------|----|----|----|----|-------------------------------------------------|
| Cao J et al.  | 13 | 4  | 22 | 43 | Zhongnan Hospital                               |
| Zhou F et al. | 32 | 19 | 18 | 95 | Jinyintan Hospital and Wuhan Pulmonary Hospital |

**Table S92. Data of Association between Increased Procalcitonin ( $\geq 0.05$  ng/mL) and Mortality**

| Study             | a  | b | c  | d  | Setting                  |
|-------------------|----|---|----|----|--------------------------|
| Chen T et al. (a) | 95 | 1 | 70 | 70 | Tongji Hospital          |
| Yao Q et al.      | 9  | 3 | 52 | 44 | Dabieshan Medical Center |

**Table S93. Data of Association between Increased C-reactive Protein ( $\geq 10$  mg/L) and Mortality**

| Study        | a  | b | c   | d  | Setting                  |
|--------------|----|---|-----|----|--------------------------|
| Cao J et al. | 16 | 1 | 36  | 49 | Zhongnan Hospital        |
| Du RH et al. | 20 | 1 | 138 | 20 | Wuhan Pulmonary Hospital |

**Table S94. Data of Association between Increased D-dimer (>1.0 µg/mL) and Mortality**

| Study         | a  | b  | c  | d  | Setting                                         |
|---------------|----|----|----|----|-------------------------------------------------|
| Yao Q et al.  | 9  | 3  | 31 | 65 | Huanggang Central Hospital                      |
| Zhou F et al. | 44 | 10 | 28 | 90 | Jinyintan Hospital and Wuhan Pulmonary Hospital |

**Table S95. Data of Association between Respiratory Rate  $\geq 30$  breaths per min and Mortality**

| Study             | a  | b  | c | d   | Setting           |
|-------------------|----|----|---|-----|-------------------|
| Chen T et al. (a) | 30 | 83 | 5 | 156 | Tongji Hospital   |
| Liu Y et al. (a)  | 4  | 29 | 4 | 207 | Zhongnan Hospital |

**Table S96. Data of Association between Respiratory Rate  $\geq 24$  breaths per min and Mortality**

| Study             | a  | b  | c  | d   | Setting                                         |
|-------------------|----|----|----|-----|-------------------------------------------------|
| Chen T et al. (a) | 66 | 47 | 22 | 139 | Tongji Hospital                                 |
| Zhou F et al.     | 34 | 20 | 22 | 115 | Jinyintan Hospital and Wuhan Pulmonary Hospital |

**Table S97. Data of Association between Bilateral Pneumonia and Mortality**

| Study             | a   | b | c   | d   | Setting                                         |
|-------------------|-----|---|-----|-----|-------------------------------------------------|
| Cao J et al.      | 14  | 3 | 58  | 27  | Zhongnan Hospital                               |
| Chen T et al. (a) | 113 | 0 | 152 | 9   | Tongji Hospital                                 |
| Yao Q et al.      | 12  | 0 | 86  | 10  | Huanggang Central Hospital                      |
| Zhang J et al.    | 20  | 5 | 530 | 108 | Renmin Hospital of Wuhan University             |
| Zhou F et al.     | 45  | 9 | 98  | 39  | Jinyintan Hospital and Wuhan Pulmonary Hospital |

**Table S98. Data of Association between Highest Temperature  $\geq 39$  °C and Mortality**

| Study        | a  | b  | c  | d  | Setting                    |
|--------------|----|----|----|----|----------------------------|
| Wu C et al.  | 14 | 30 | 63 | 94 | Wuhan Jinyintan Hospital   |
| Yao Q et al. | 3  | 9  | 7  | 89 | Huanggang Central Hospital |

**Table S99. Data of Respiratory Rate between Nonsurvivors and Survivors**

| Study             | Nonsurvivors |       |       | Survivors |      |       | Setting                                                         |
|-------------------|--------------|-------|-------|-----------|------|-------|-----------------------------------------------------------------|
|                   | Mean         | SD    | Total | Mean      | SD   | Total |                                                                 |
| Chen T et al. (a) | 24.67        | 7.51  | 113   | 20.33     | 0.75 | 161   | Tongji Hospital                                                 |
| Du RH et al.      | 24.83        | 11.53 | 21    | 20.33     | 0.75 | 158   | Wuhan Pulmonary Hospital                                        |
| Hu H et al.       | 23.21        | 5.38  | 19    | 20.27     | 3.27 | 86    | Renmin Hospital of Wuhan University<br>(2020 Feb 7- 2020 Mar 7) |
| Wang L et al. (b) | 23           | 9.1   | 65    | 19.33     | 1.49 | 274   | Renmin Hospital of Wuhan University<br>(2020 Jan 1- 2020 Feb 6) |
| Yao Q et al.      | 20.33        | 2.52  | 12    | 20.33     | 2.49 | 13    | Huanggang Central Hospital                                      |

**Table S100. Data of Heart Rate between Nonsurvivors and Survivors**

| Study             | Nonsurvivors |       |       | Survivors |       |       | Setting                                                    |
|-------------------|--------------|-------|-------|-----------|-------|-------|------------------------------------------------------------|
|                   | Mean         | SD    | Total | Mean      | SD    | Total |                                                            |
| Chen T et al. (a) | 98           | 21.78 | 113   | 91.33     | 18.70 | 161   | Tongji Hospital                                            |
| Du RH et al.      | 93.83        | 25.04 | 21    | 87.6      | 15.94 | 158   | Wuhan Pulmonary Hospital                                   |
| Hu H et al.       | 87.47        | 13.56 | 19    | 84.23     | 17.48 | 86    | Renmin Hospital of Wuhan University<br>(2020 Feb 7- Mar 7) |
| Wang L et al. (b) | 87.67        | 17.44 | 65    | 82.67     | 10.43 | 274   | Renmin Hospital of Wuhan University<br>(2020 Jan 1- Feb 6) |
| Yang X et al. (b) | 89           | 15    | 32    | 89        | 20    | 20    | Wuhan Jin Yintan hospital                                  |
| Yao Q et al.      | 81           | 12.58 | 12    | 84.33     | 5.81  | 13    | Huanggang Central Hospital                                 |

**Table S101. Data of PaO<sub>2</sub> between Nonsurvivors and Survivors**

| Study             | Nonsurvivors |       |       | Survivors |       |       | Setting                  |
|-------------------|--------------|-------|-------|-----------|-------|-------|--------------------------|
|                   | Mean         | SD    | Total | Mean      | SD    | Total |                          |
| Chen T et al. (a) | 61.07        | 25.66 | 35    | 124.97    | 56.42 | 32    | Tongji Hospital          |
| Du RH et al.      | 58.67        | 17.49 | 21    | 75.17     | 24.69 | 158   | Wuhan Pulmonary Hospital |
| Peng YD et al.    | 78.67        | 28.29 | 17    | 90        | 12.04 | 95    | Union Hospital           |

**Table S102. Data of PaCO<sub>2</sub> between Nonsurvivors and Survivors**

| Study             | Nonsurvivors |      |       | Survivors |      |       | Setting                  |
|-------------------|--------------|------|-------|-----------|------|-------|--------------------------|
|                   | Mean         | SD   | Total | Mean      | SD   | Total |                          |
| Chen T et al. (a) | 31.93        | 5.49 | 35    | 37.93     | 4.89 | 32    | Tongji Hospital          |
| Du RH et al.      | 34.67        | 9.54 | 21    | 37.33     | 5.24 | 158   | Wuhan Pulmonary Hospital |
| Peng YD et al.    | 37           | 8.89 | 17    | 41.67     | 4.52 | 95    | Union Hospital           |

**Table S103. Data of SpO<sub>2</sub> between Nonsurvivors and Survivors**

| Study             | Nonsurvivors |       |       | Survivors |      |       | Setting                                |
|-------------------|--------------|-------|-------|-----------|------|-------|----------------------------------------|
|                   | Mean         | SD    | Total | Mean      | SD   | Total |                                        |
| Chen T et al. (a) | 84.67        | 14.27 | 113   | 96.77     | 2.02 | 161   | Tongji Hospital                        |
| Hu H et al.       | 86.53        | 12.46 | 19    | 96.17     | 3.1  | 86    | Renmin Hospital of Wuhan<br>University |
| Peng YD et al.    | 95.33        | 3.23  | 17    | 96.33     | 2.26 | 95    | Union Hospital                         |

**Table S104. Data of PaO<sub>2</sub>/FiO<sub>2</sub> between Nonsurvivors and Survivors**

| Study             | Nonsurvivors |        |       | Survivors |        |       | Setting                   |
|-------------------|--------------|--------|-------|-----------|--------|-------|---------------------------|
|                   | Mean         | SD     | Total | Mean      | SD     | Total |                           |
| Chen T et al. (a) | 117.13       | 71.50  | 35    | 329.67    | 151.33 | 32    | Tongji Hospital           |
| Du RH et al.      | 185.5        | 64.8   | 21    | 261.5     | 108.2  | 158   | Wuhan Pulmonary Hospital  |
| Peng YD et al.    | 215.67       | 253.02 | 17    | 429.33    | 25.59  | 95    | Union Hospital            |
| Yang X et al. (b) | 62.8         | 17.15  | 32    | 99.03     | 47.95  | 20    | Wuhan Jin Yintan hospital |

**Table S105. Data of APACHE II Score between Nonsurvivors and Survivors**

| Study             | Nonsurvivors |      |       | Survivors |      |       | Setting                    |
|-------------------|--------------|------|-------|-----------|------|-------|----------------------------|
|                   | Mean         | SD   | Total | Mean      | SD   | Total |                            |
| Yang X et al. (b) | 18           | 3.1  | 32    | 14.33     | 3.99 | 20    | Wuhan Jin Yintan hospital  |
| Yao Q et al.      | 11.67        | 10.9 | 12    | 6         | 3.32 | 13    | Huanggang Central Hospital |

**Table S106. Data of SOFA Score between Nonsurvivors and Survivors**

| Study         | Nonsurvivors |      |       | Survivors |      |       | Setting                                         |
|---------------|--------------|------|-------|-----------|------|-------|-------------------------------------------------|
|               | Mean         | SD   | Total | Mean      | SD   | Total |                                                 |
| Yao Q et al.  | 4.33         | 5.03 | 12    | 2         | 1.66 | 13    | Huanggang Central Hospital                      |
| Zhou F et al. | 4.83         | 1.52 | 54    | 1.33      | 0.75 | 137   | Jinyintan Hospital and Wuhan Pulmonary Hospital |

**Table S107 Data of Time from Illness Onset to Hospital Admission between Nonsurvivors and Survivors**

| Study             | Nonsurvivors |      |       | Survivors |      |       | Setting                                                      |
|-------------------|--------------|------|-------|-----------|------|-------|--------------------------------------------------------------|
|                   | Mean         | SD   | Total | Mean      | SD   | Total |                                                              |
| Cao J et al.      | 5.67         | 4.04 | 17    | 5.33      | 3.02 | 85    | Zhongnan Hospital                                            |
| Chen T et al. (a) | 10           | 4.51 | 113   | 9         | 4.49 | 161   | Tongji Hospital                                              |
| Hu H et al.       | 8.37         | 5.78 | 19    | 10.24     | 7.51 | 86    | Renmin Hospital of Wuhan University (2020 Feb 7- 2020 Mar 7) |
| Wang L et al. (b) | 10.33        | 5.31 | 65    | 10        | 4.47 | 274   | Renmin Hospital of Wuhan University (2020 Jan 1- 2020 Feb 6) |
| Yao Q et al.      | 7.33         | 2.52 | 12    | 6         | 3.32 | 13    | Huanggang Central Hospital                                   |
| Zhou F et al.     | 11.33        | 5.33 | 54    | 10.67     | 3.75 | 137   | Jinyintan Hospital and Wuhan Pulmonary Hospital              |

**Table S108. Sensitivity Analyses of Dichotomous Prognostic Factors.**

| Prognostic factors                             | Pre-sensitivity analysis |                    | Post-sensitivity analysis, RR (95% CI) |                          |                          |
|------------------------------------------------|--------------------------|--------------------|----------------------------------------|--------------------------|--------------------------|
|                                                | I <sup>2</sup> (%)       | RR (95% CI)        | Omitted largest study                  | Omitted smallest study   | Fixed-effects model      |
| Advanced age                                   | 86                       | 2.31 [1.99, 2.67]  | 2.38 [1.96, 2.90]                      | 2.33 [2.00,2.71]         | 2.12 [2.03,2.21]         |
| Male sex                                       | 65                       | 1.30 [1.17, 1.44]  | 1.34 [1.22, 1.47]                      | 1.30 [1.16, 1.45]        | 1.21 [1.15, 1.27]        |
| Any comorbidity                                | 97                       | 2.85 [1.47, 5.51]  | 2.85 [1.17, 6.96]                      | 3.16 [1.42, 7.05]        | 1.99 [1.80, 2.20]        |
| Hypertension                                   | 82                       | 2.11 [1.49, 2.99]  | 1.80 [1.48, 2.19]                      | 2.25 [1.55, 3.28]        | 1.90 [1.66, 2.17]        |
| Chronic respiratory disease                    | 50                       | 3.84 [1.81, 8.16]  | 2.70 [1.48, 4.93]                      | 3.87 [1.38, 10.9]        | 3.29 [1.99, 5.44]        |
| Malignancy                                     | 54                       | 2.03 [0.92, 4.44]  | <b>3.08 [1.39, 6.82]</b>               | 2.31 [0.92, 5.76]        | 1.30 [0.96, 1.76]        |
| Anorexia                                       | 64                       | 1.12 [0.81, 1.55]  | <b>1.24 [1.11, 1.39]</b>               | 1.02 [0.65, 1.59]        | 1.11 [0.91, 1.34]        |
| Nausea                                         | 61                       | 1.25 [0.46, 3.40]  | 1.37 [0.37, 5.07]                      | 0.73 [0.35, 1.55]        | 1.15 [0.66, 1.98]        |
| Antiviral therapy                              | 92                       | 0.87 [0.71, 1.08]  | 0.86 [0.59, 1.26]                      | 0.83 [0.64, 1.08]        | <b>0.83 [0.76, 0.90]</b> |
| Antibiotic therapy                             | 94                       | 1.20 [1.02, 1.40]  | 1.28 [1.00, 1.63]                      | 1.28 [1.04, 1.57]        | 1.10 [1.06, 1.15]        |
| Immunoglobulin therapy                         | 90                       | 2.00 [0.82, 4.88]  | 2.32 [0.57, 9.41]                      | 2.25 [0.88, 5.76]        | <b>1.69 [1.37, 2.08]</b> |
| Corticosteroid therapy                         | 88                       | 1.79 [1.25, 2.55]  | 2.02 [1.36, 3.02]                      | 1.91 [1.25, 2.93]        | 1.45 [1.31, 1.60]        |
| White blood cell count $\geq 10 \times 10^9/L$ | 84                       | 6.41 [2.18, 18.8]  | 4.97 [1.26, 19.6]                      | 10.2 [3.52, 29.3]        | 6.74 [4.54, 10.0]        |
| Platelet count $< 100 \times 10^9/L$           | 65                       | 3.34 [0.75, 14.8]  | 1.82 [0.66, 5.06]                      | 3.82 [0.26, 56.7]        | 4.09 [1.95, 8.59]        |
| Platelet count $< 125 \times 10^9/L$           | 92                       | 4.65 [2.13, 10.2]  | Not available                          | Not available            | 5.95 [5.06, 7.00]        |
| AST $> 40$ U/L                                 | 80                       | 2.01 [1.13, 3.58]  | 1.52 [1.10, 2.11]                      | 2.36 [1.12, 4.97]        | 2.39 [1.84, 3.11]        |
| Procalcitonin $\geq 0.1$ ng/mL                 | 69                       | 2.96 [1.67, 5.25]  | Not available                          | Not available            | 3.18 [2.28, 4.44]        |
| Procalcitonin $\geq 0.05$ ng/mL                | 66                       | 1.72 [1.23, 2.43]  | Not available                          | Not available            | 1.88 [1.61, 2.19]        |
| C-reactive protein $\geq 10$ mg/L              | 97                       | 1.58 [0.68, 3.63]  | Not available                          | Not available            | <b>1.42 [1.27, 1.59]</b> |
| D-dimer $> 1.0$ $\mu\text{g/mL}$               | 51                       | 2.89 [1.94, 4.29]  | Not available                          | Not available            | 3.12 [2.35, 4.14]        |
| Sepsis                                         | 54                       | 2.59 [2.11, 3.17]  | 2.84 [1.83, 4.40]                      | 2.38 [2.08, 2.73]        | 2.46 [2.16, 2.81]        |
| Acute respiratory distress syndrome            | 97                       | 6.82 [2.56, 18.2]  | 5.36 [2.25, 12.8]                      | 5.71 [2.01, 16.2]        | 3.83 [3.36, 4.37]        |
| Acute cardiac injury                           | 72                       | 8.22 [4.95, 13.7]  | 10.6 [4.87, 22.8]                      | 7.07 [4.30, 11.6]        | 6.98 [5.56, 8.76]        |
| Acute infection                                | 93                       | 9.78 [2.05, 46.7]  | 17.1 [3.42, 86.0]                      | 7.00 [1.39, 35.3]        | 3.87 [3.14, 4.77]        |
| Acute kidney injury                            | 55                       | 9.64 [6.01, 15.4]  | 13.0 [5.48, 30.8]                      | 8.89 [5.26, 15.0]        | 8.47 [7.31, 9.80]        |
| Heart failure                                  | 76                       | 4.18 [2.37, 7.36]  | 5.06 [1.97, 13.0]                      | 5.13 [2.46, 10.7]        | 4.47 [3.36, 5.95]        |
| Arrhythmia                                     | 85                       | 4.86 [1.24, 19.0]  | Not available                          | Not available            | 3.93 [2.44, 6.34]        |
| Shock                                          | 82                       | 12.6 [1.25, 127.1] | 33.7 [1.04, 1093]                      | <b>16.6 [0.08, 3391]</b> | 21.4 [8.32, 54.8]        |
| Acute liver injury                             | 93                       | 3.78 [1.18, 12.1]  | <b>1.91 [0.97, 3.73]</b>               | 5.44 [1.33, 22.2]        | 3.43 [2.71, 4.34]        |
| Highest temperature $\geq 39$ °C               | 80                       | 1.48 [0.36, 6.12]  | Not available                          | Not available            | 0.93 [0.61, 1.44]        |

**Table S109. Sensitivity Analyses of Continuous Prognostic Factors.**

| Prognostic factors                    | Pre-sensitivity analysis |                        | Post-sensitivity analysis, MD (95% CI) |                            |                             |
|---------------------------------------|--------------------------|------------------------|----------------------------------------|----------------------------|-----------------------------|
|                                       | I <sup>2</sup> (%)       | MD (95% CI)            | Omitted largest study                  | Omitted smallest study     | Fixed-effects model         |
| Age                                   | 89                       | 13.9 [8.95, 18.9]      | 14.2[8.54, 19.9]                       | 14.6 [9.32, 19.8]          | 11.8 [10.3, 13.3]           |
| Respiratory rate, breaths per min     | 70                       | 2.94 [1.10, 4.79]      | 2.76 [0.36, 5.17]                      | 3.96 [2.92, 5.00]          | 3.09 [2.17, 4.01]           |
| PaO <sub>2</sub> , mm Hg              | 89                       | -28.7 [-52.7, -4.65]   | <b>-37.0 [-88.4, 14.6]</b>             | -15.1 [-22.2, -7.91]       | -20.0 [-26.8, -13.2]        |
| SpO <sub>2</sub>                      | 96                       | -7.45 [-15.9, 0.96]    | -4.88 [-13.3, 3.54]                    | -6.50 [-17.4, 4.38]        | <b>-4.29 [-5.62, -2.95]</b> |
| PaO <sub>2</sub> /FiO <sub>2</sub>    | 92                       | -122.6 [-198.2, -47.0] | -148.8 [-291.0, -6.49]                 | -161.0 [-270.2, -51.8]     | -66.5 [-83.6, -49.3]        |
| Neutrophil count, ×10 <sup>9</sup> /L | 61                       | 3.86 [2.74, 4.99]      | 3.85 [2.45, 5.25]                      | 3.92 [2.70, 5.14]          | 4.20 [3.59, 4.81]           |
| Lymphocyte count, ×10 <sup>9</sup> /L | 78                       | -0.34 [-0.47, -0.21]   | -0.31 [-0.48, -0.14]                   | -0.37 [-0.49, -0.25]       | -0.38 [-0.43, -0.33]        |
| Monocyte count, ×10 <sup>9</sup> /L   | 62                       | -0.06 [-0.11, -0.01]   | <b>-0.04 [-0.09, 0.01]</b>             | <b>-0.05 [-0.12, 0.01]</b> | -0.06 [-0.09, -0.03]        |
| Platelet count, ×10 <sup>9</sup> /L   | 59                       | -34.0 [-57.1, -10.9]   | <b>-25.0 [-55.6, 5.53]</b>             | -43.8 [-60.2, -27.5]       | -40.7 [-53.4, -28.0]        |
| Albumin, g/L                          | 87                       | -4.05 [-6.51, -1.59]   | -3.31 [-6.24, -0.38]                   | -3.60 [-6.43, -0.77]       | -4.81 [-5.52, -4.10]        |
| ALT, U/L                              | 60                       | 3.58 [-0.72, 7.87]     | 4.03 [-1.17, 9.23]                     | 5.11 [1.12, 9.10]          | 3.75 [1.29, 6.22]           |
| AST, U/L                              | 73                       | 14.8 [9.56, 20.1]      | 14.5 [7.67, 21.4]                      | 14.9 [9.49, 20.4]          | 15.2 [12.1, 18.2]           |
| Creatinine, μmol/L                    | 64                       | 18.0 [10.1, 25.9]      | 17.1 [7.91, 26.2]                      | 17.3 [8.79, 25.8]          | 16.0 [11.9, 20.0]           |
| Blood urea nitrogen, mmol/L           | 80                       | 3.94 [1.97, 5.90]      | Not available                          | Not available              | 4.23 [3.41, 5.04]           |
| Urea, mmol/L                          | 71                       | 3.41 [1.81, 5.02]      | Not available                          | Not available              | 3.11 [2.36, 3.87]           |
| APTT, seconds                         | 91                       | -0.47 [-3.31, 2.37]    | -1.01 [-4.89, 2.86]                    | <b>0.94 [0.13, 1.76]</b>   | -0.07 [-0.81, 0.66]         |
| C-reactive protein, mg/L              | 92                       | 55.9 [27.3, 84.5]      | 53.5 [21.0, 86.0]                      | 64.9 [46.1, 83.7]          | 45.7 [38.6, 52.8]           |
| Procalcitonin, ng/mL                  | 76                       | 0.27 [0.14, 0.40]      | 0.23 [0.09, 0.38]                      | 0.26 [0.14, 0.38]          | 0.25 [0.20, 0.29]           |
| Lactate dehydrogenase, U/L            | 81                       | 225.6 [153.8, 297.3]   | 236.6 [142.2, 331.0]                   | 235.9 [162.3, 309.4]       | 246.4 [218.9, 274.0]        |
| Creatine kinase, U/L                  | 75                       | 59.3 [26.2, 92.5]      | 59.9 [16.2, 103.6]                     | 70.5 [38.3, 102.6]         | 58.1 [43.4, 72.7]           |
| γ-glutamyl transpeptidase, U/L        | 92                       | 4.91 [-16.5, 26.4]     | Not available                          | Not available              | <b>8.52 [3.02, 14.0]</b>    |
| Creatine kinase-MB, U/L               | 74                       | 3.11 [0.84, 5.37]      | 5.12 [0.10, 10.1]                      | 2.41 [0.39, 4.43]          | 1.68 [1.15, 2.21]           |
| hs-cTnI, ng/mL                        | 87                       | 68.6 [29.3, 107.9]     | 49.8 [17.3, 82.4]                      | 94.6 [30.3, 159.0]         | 50.5 [38.4, 62.5]           |
| Interleukin-6, pg/mL                  | 96                       | 47.8 [10.6, 85.0]      | <b>34.1 [-2.65, 70.8]</b>              | 45.6 [7.58, 83.6]          | 5.61 [3.91, 7.30]           |

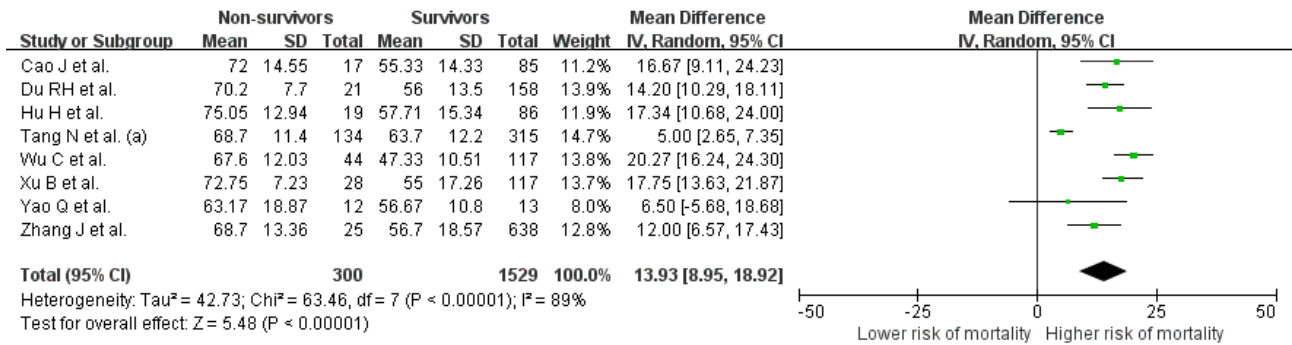

Figure S1. Forest plot of mean difference in age between nonsurvivors and survivors

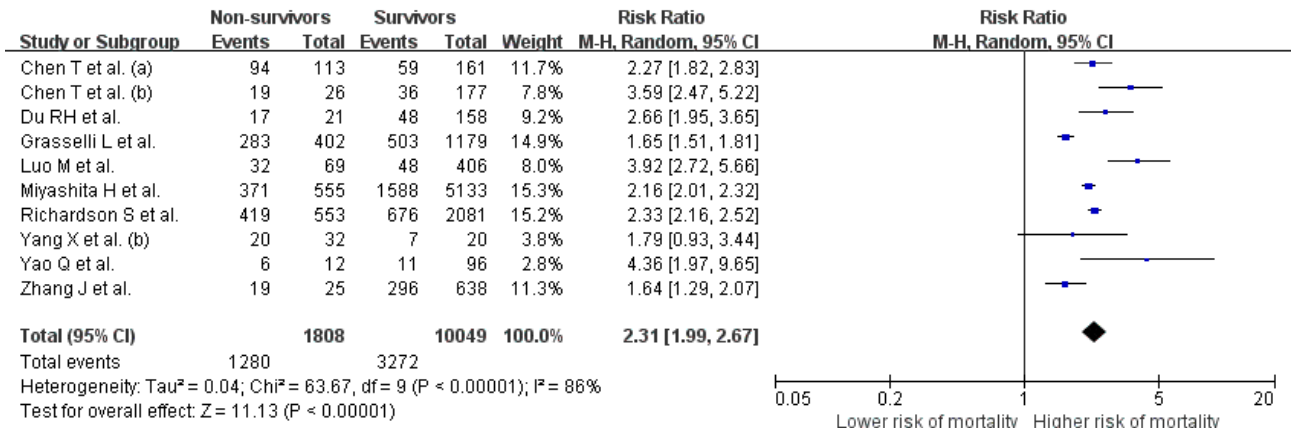

Figure S2. Forest plot of association between advanced age and mortality

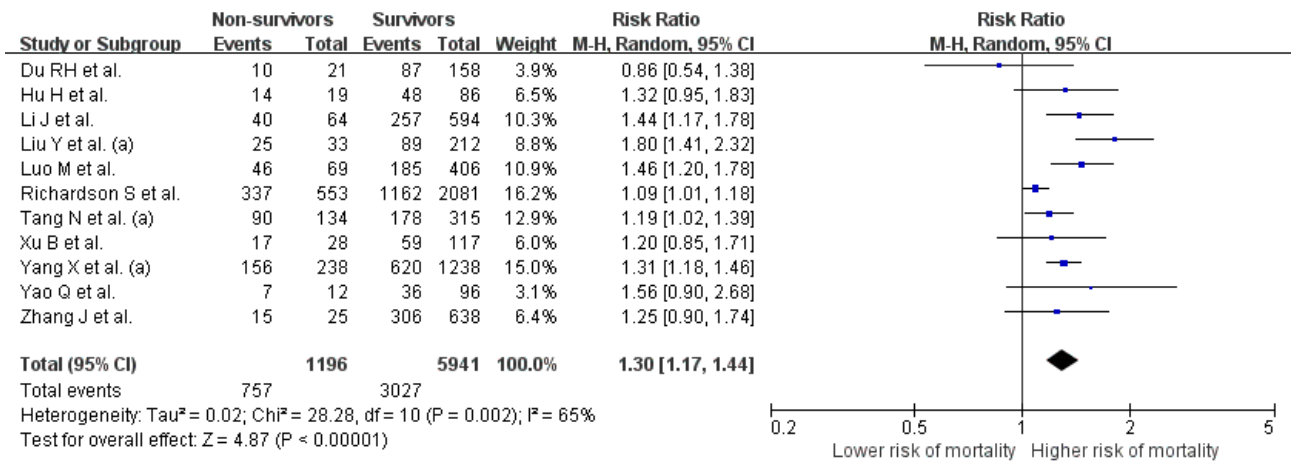

Figure S3. Forest plot of association between male sex and mortality



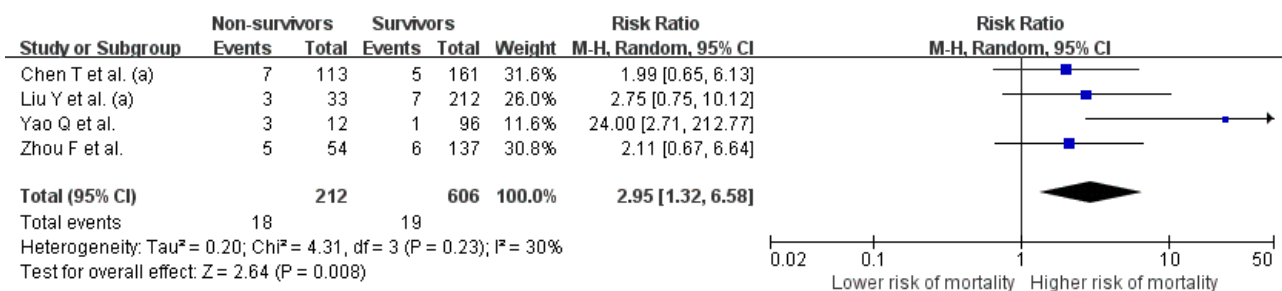

Figure S4. Forest plot of association between current smoking and mortality

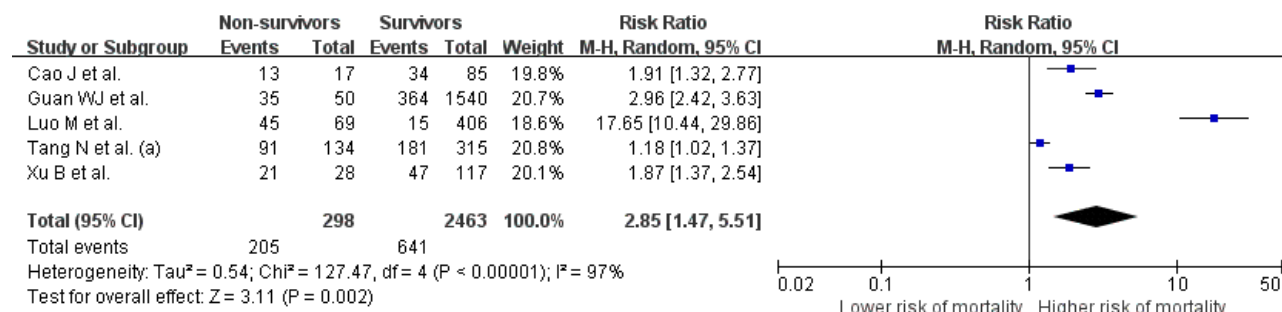

Figure S5. Forest plot of association between preexisting any comorbidity and mortality

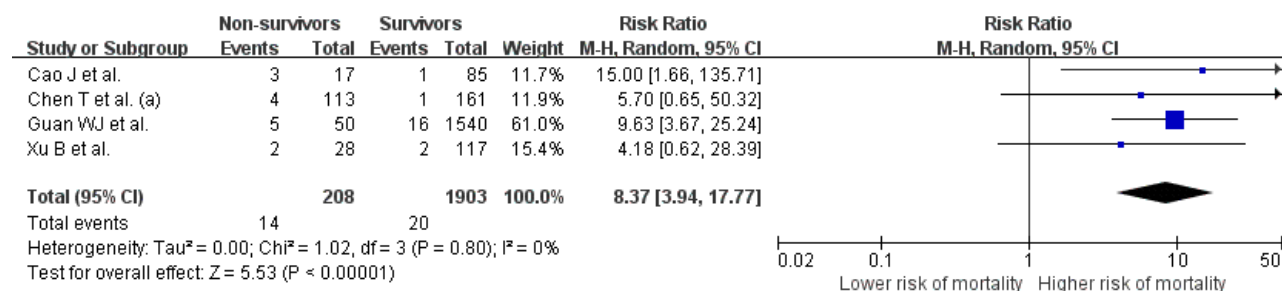

Figure S6. Forest plot of association between preexisting chronic kidney disease and mortality

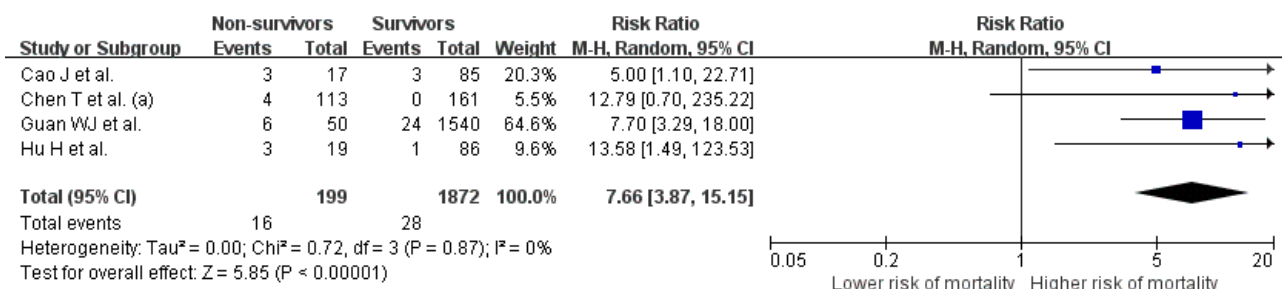

Figure S7. Forest plot of association between cerebrovascular disease and mortality

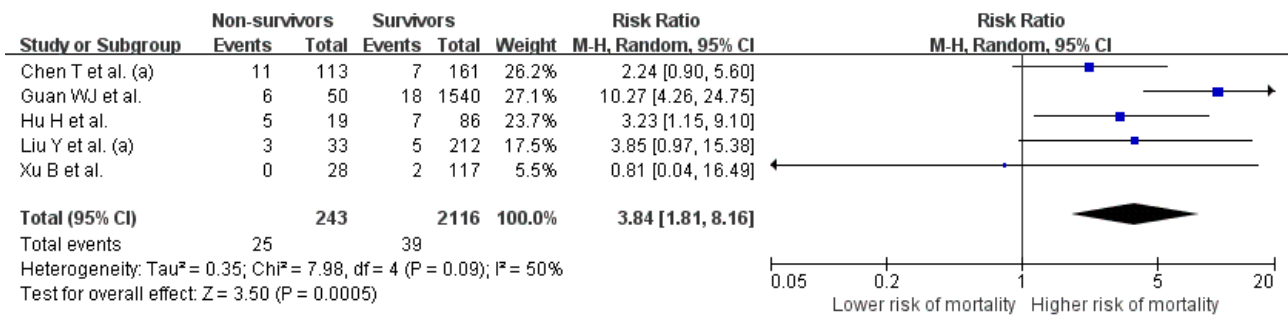

Figure S8. Forest plot of association between preexisting chronic respiratory disease and mortality

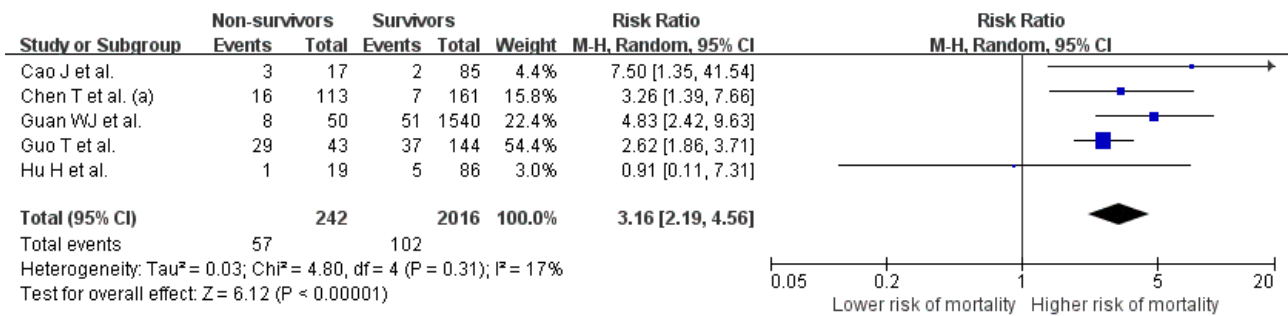

Figure S9. Forest plot of association between preexisting cardiovascular disease and mortality

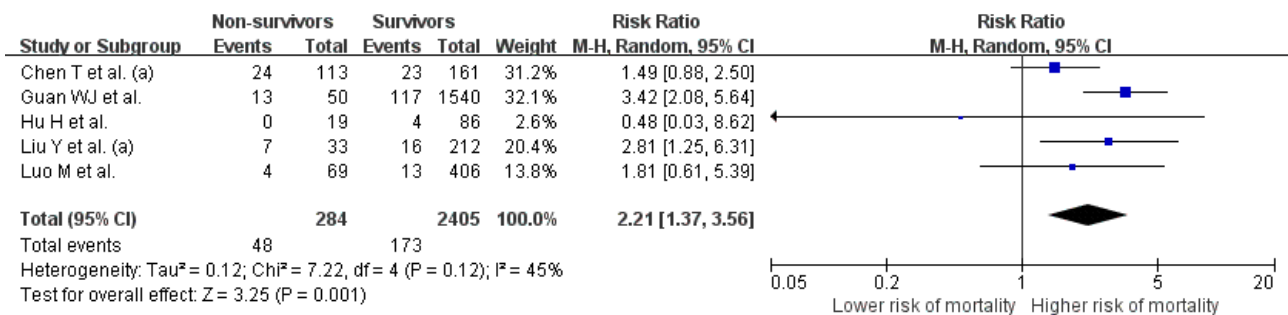

Figure S10. Forest plot of association between preexisting diabetes mellitus and mortality

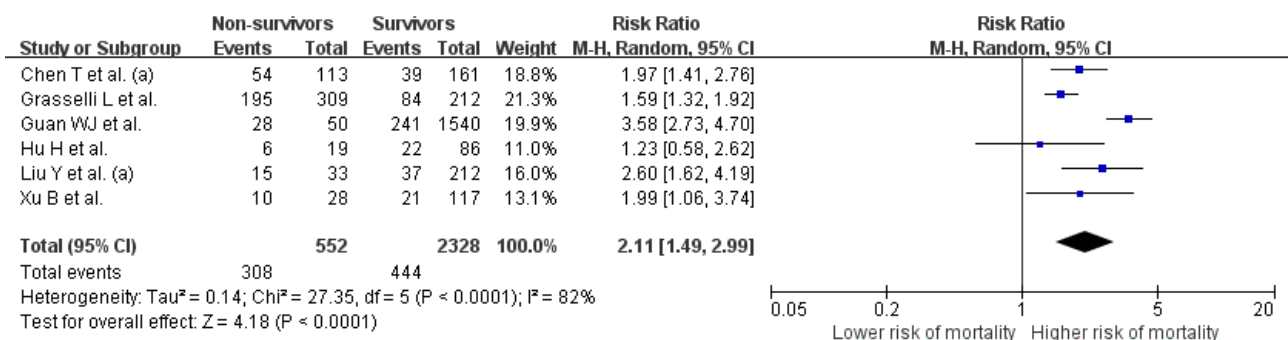

Figure S11. Forest plot of association between preexisting hypertension and mortality

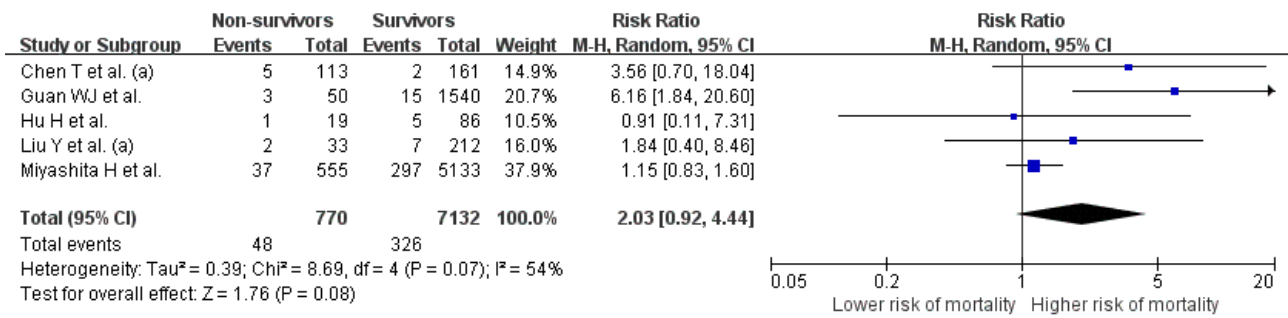

Figure S12. Forest plot of association between preexisting malignancy and mortality

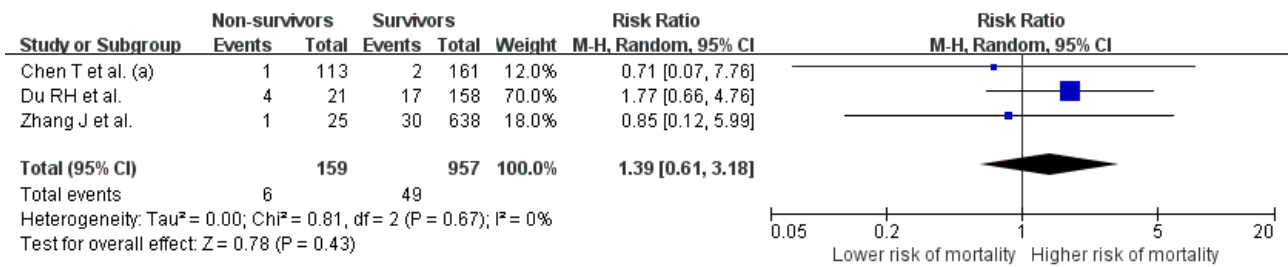

Figure S13. Forest plot of association between preexisting gastrointestinal disease and mortality

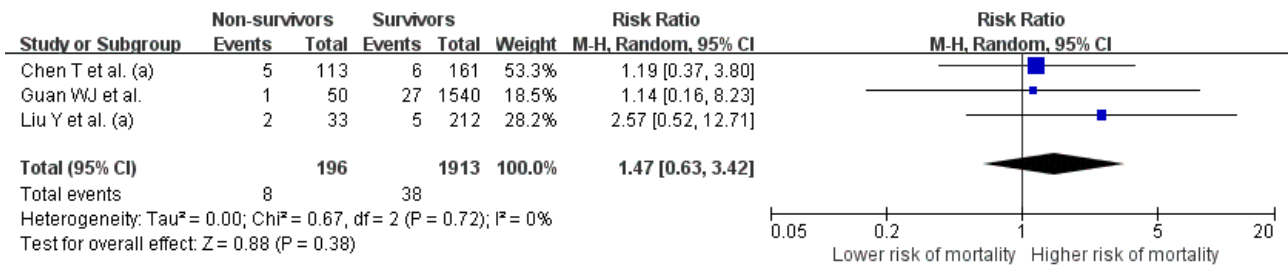

Figure S14. Forest plot of association between preexisting chronic liver disease and mortality

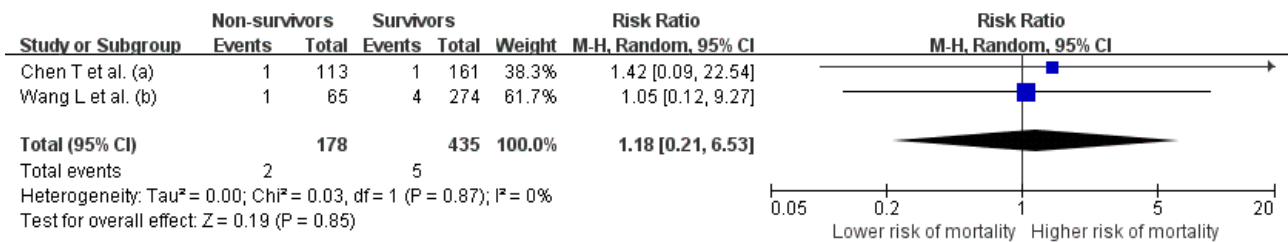

Figure S15. Forest plot of association between preexisting autoimmune disease and mortality

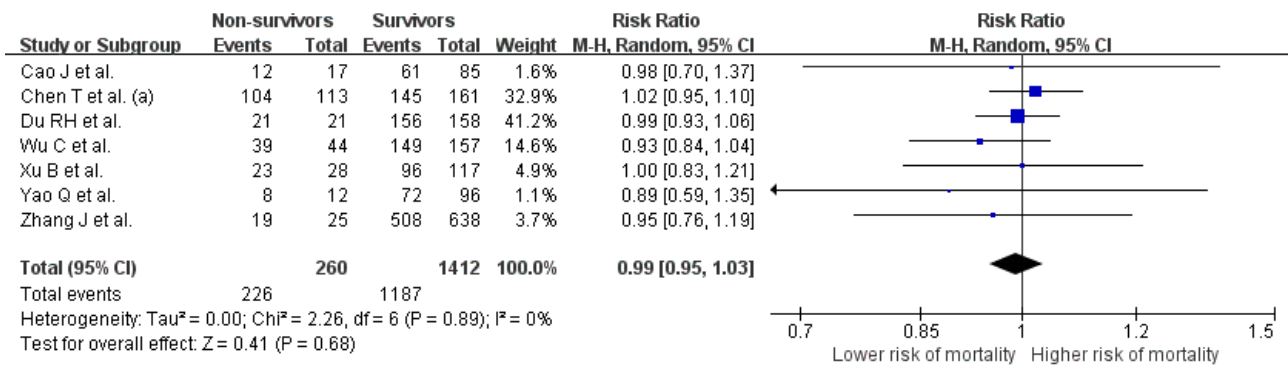

Figure S16. Forest plot of association between symptoms of fever and mortality

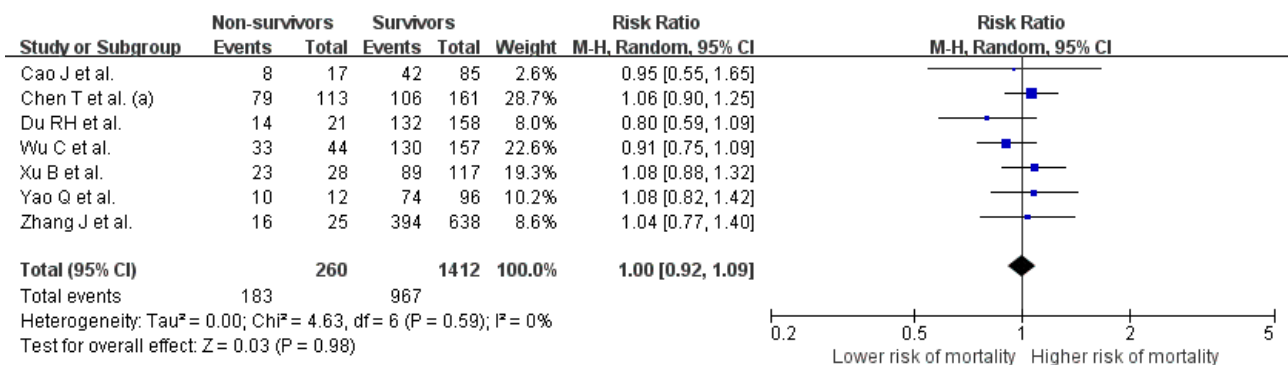

Figure S17. Forest plot of association between symptoms of cough and mortality

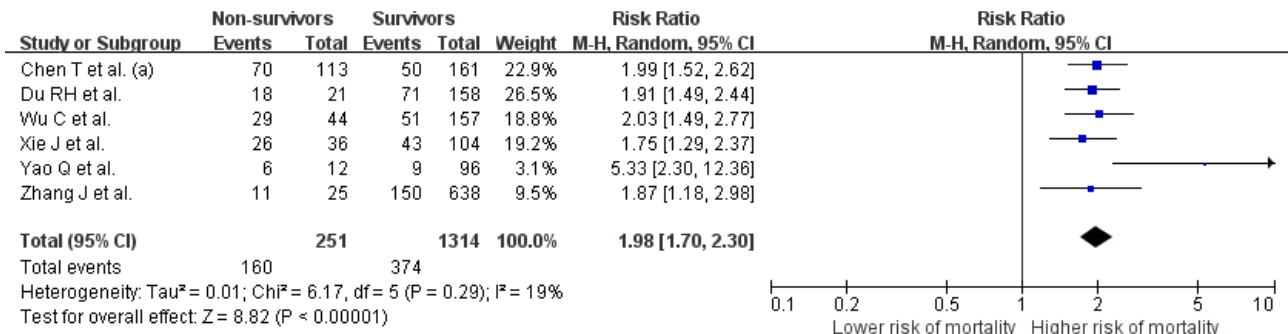

Figure S18. Forest plot of association between symptoms of dyspnea and mortality

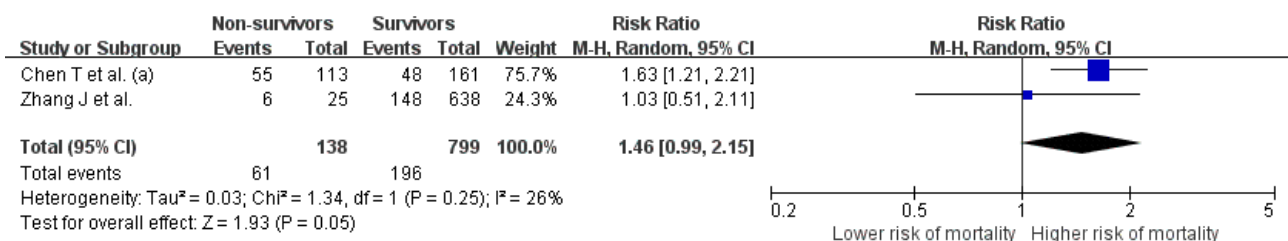

Figure S19. Forest plot of association between symptoms of chest tightness and mortality

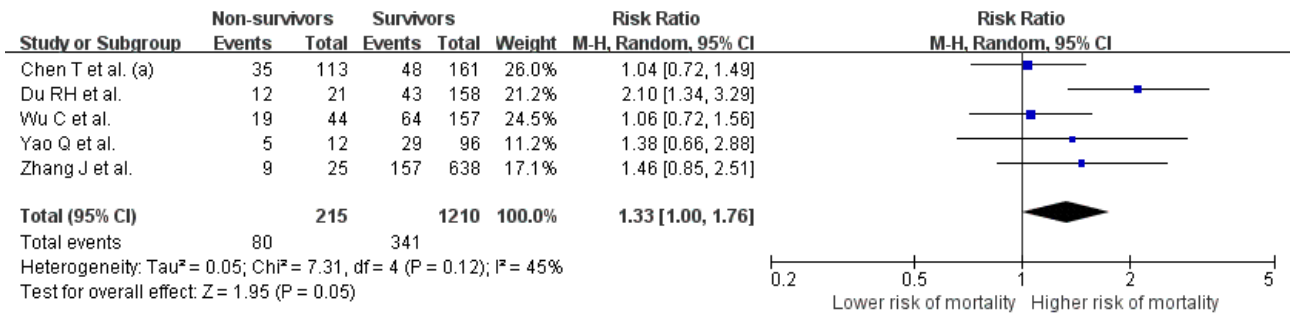

Figure S20. Forest plot of association between symptoms of sputum production and mortality

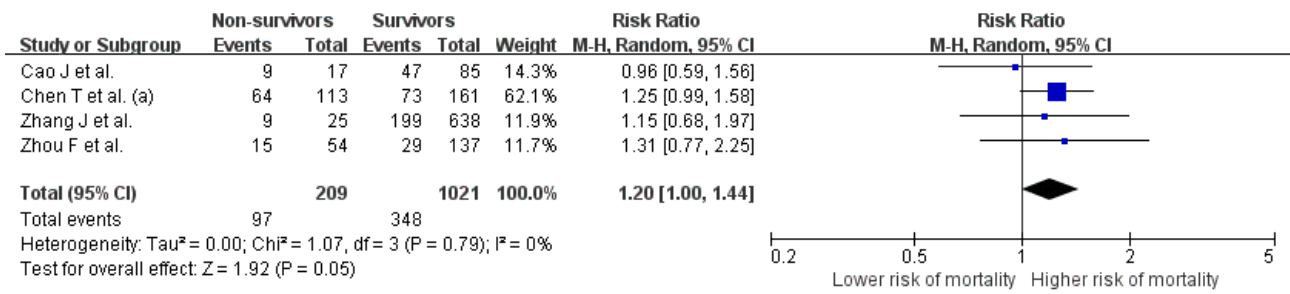

Figure S21. Forest plot of association between symptoms of fatigue and mortality

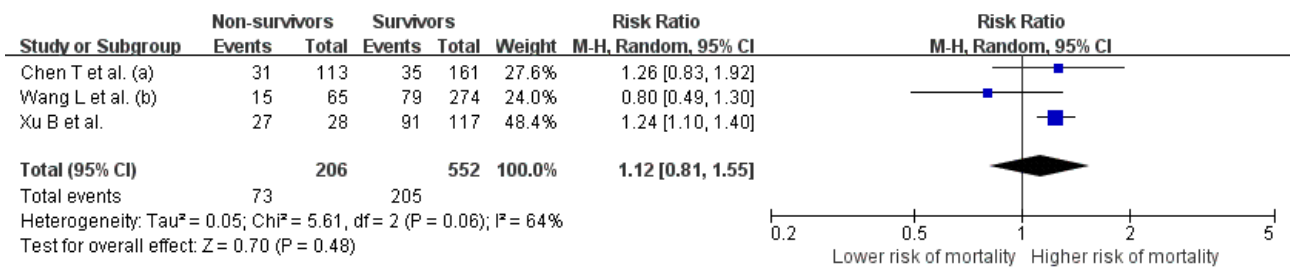

Figure S22. Forest plot of association between symptoms of anorexia and mortality

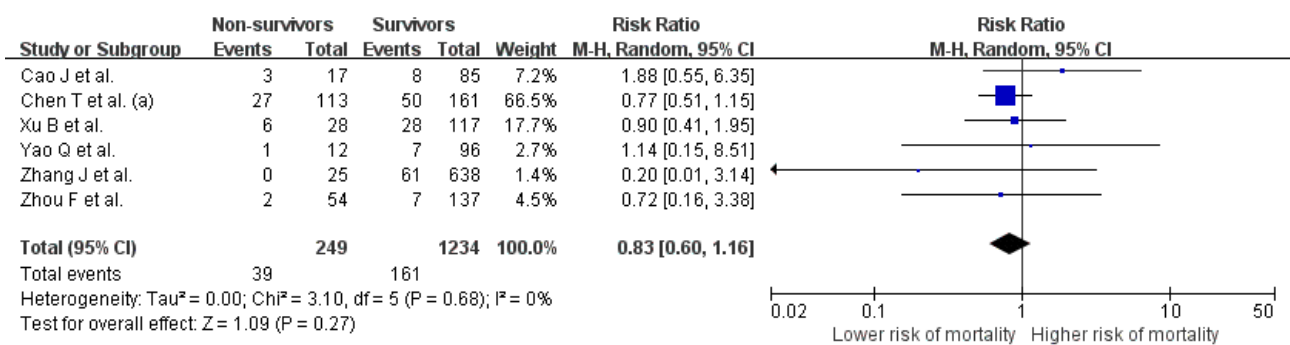

Figure S23. Forest plot of association between symptoms of diarrhea and mortality

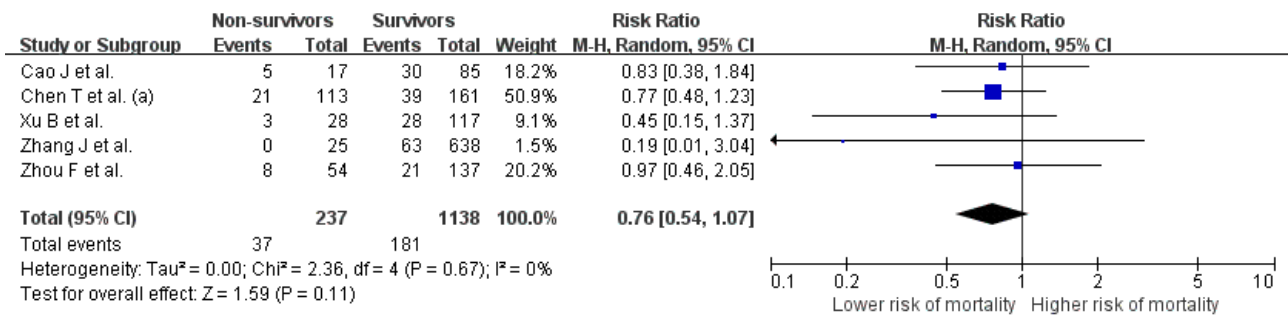

Figure S24. Forest plot of association between symptoms of myalgia and mortality

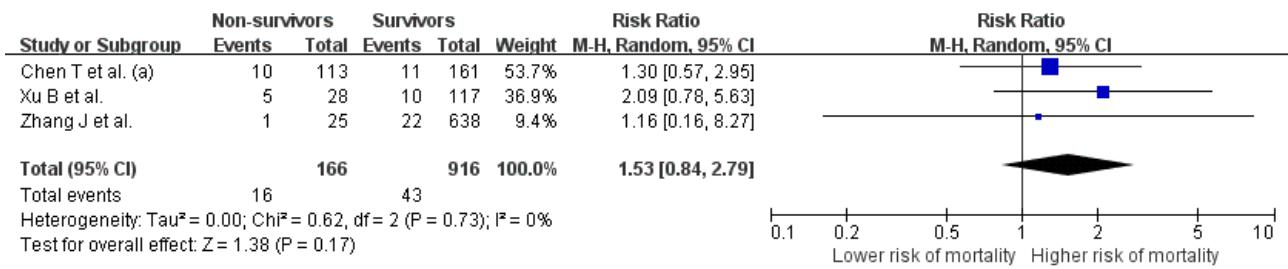

Figure S25. Forest plot of association between symptoms of dizziness and mortality

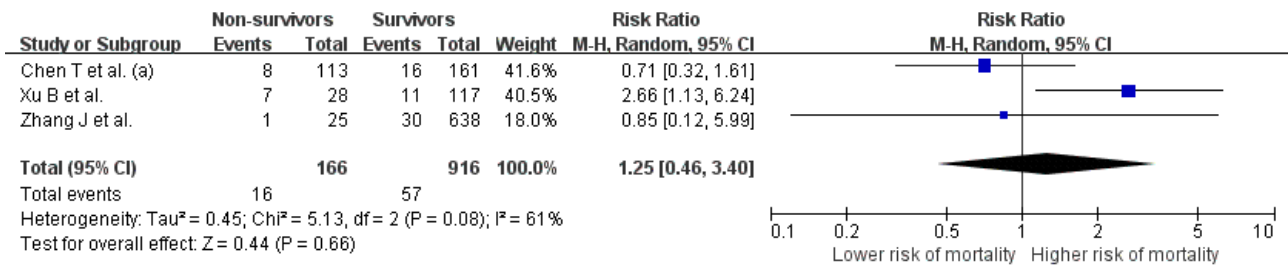

Figure S26. Forest plot of association between symptoms of nausea and mortality

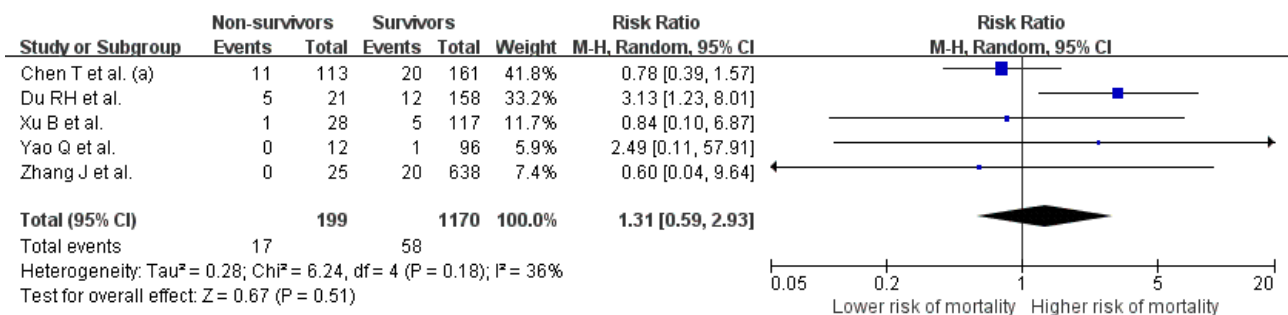

Figure S27. Forest plot of association between symptoms of headache and mortality

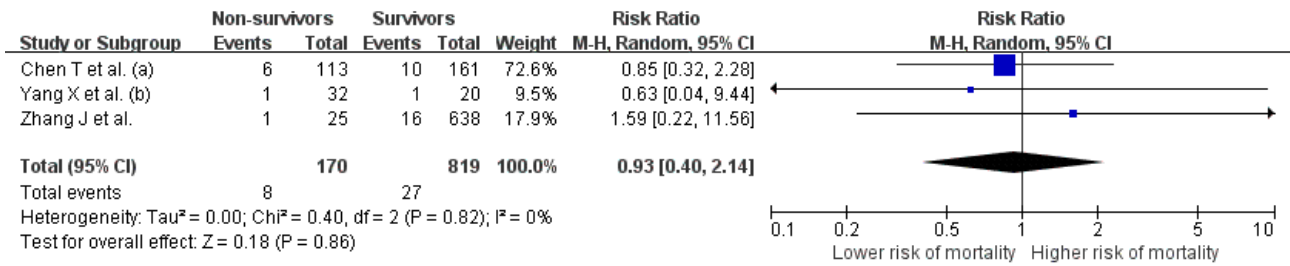

Figure S28. Forest plot of association between symptoms of vomiting and mortality

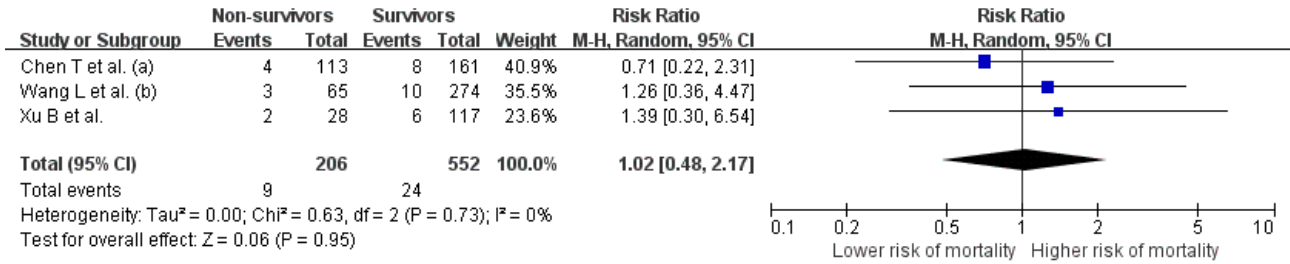

Figure S29. Forest plot of association between symptoms of pharyngalgia and mortality

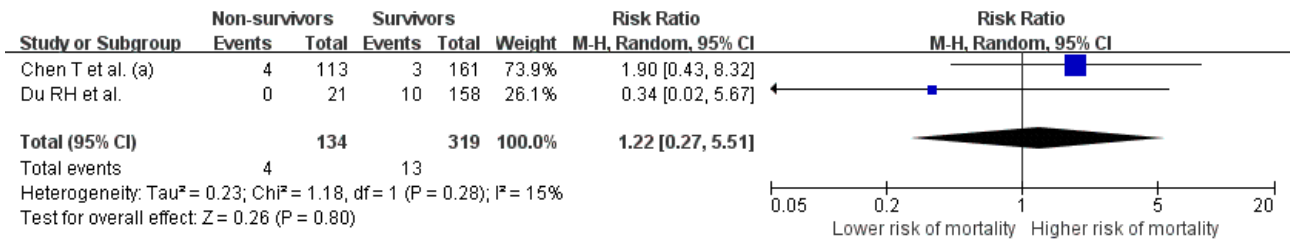

Figure S30. Forest plot of association between symptoms of hemoptysis and mortality

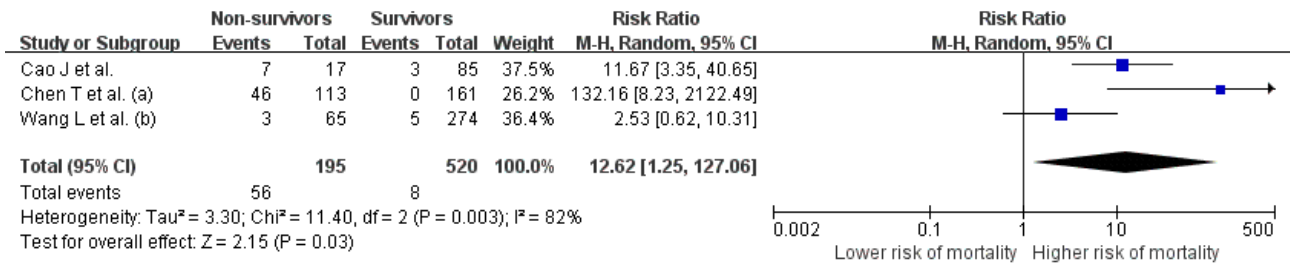

Figure S31. Forest plot of association between shock and mortality

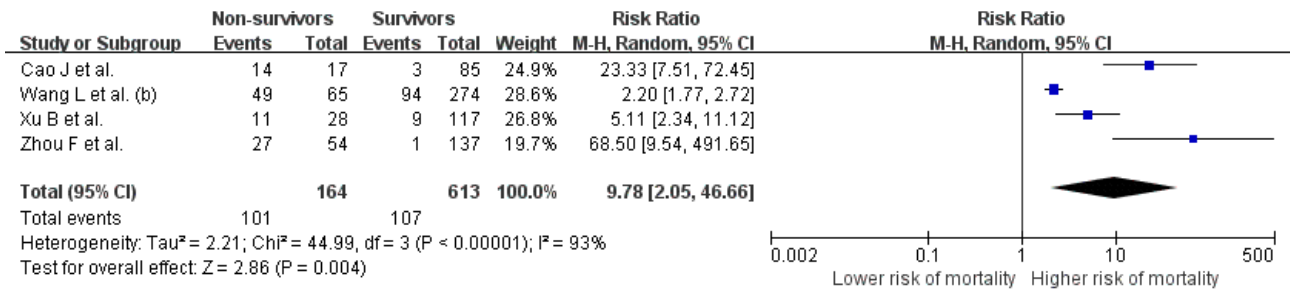

Figure S32. Forest plot of association between acute infection and mortality

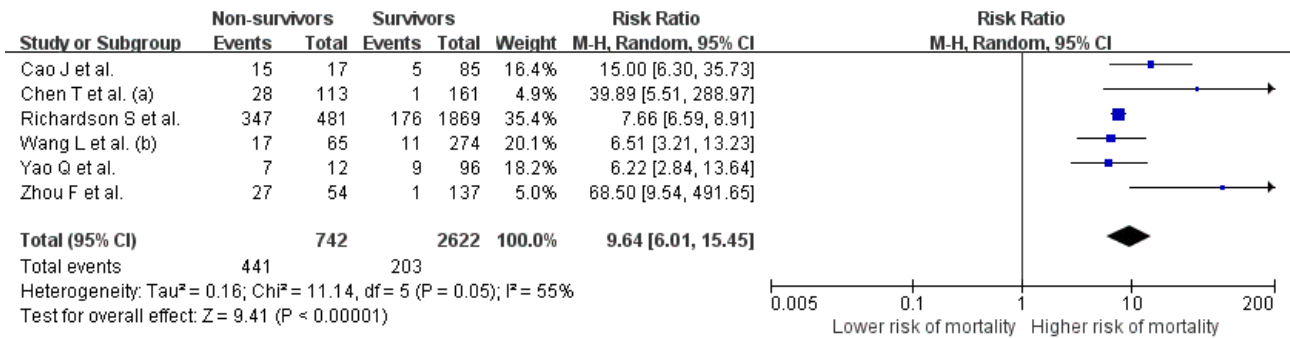

Figure S33. Forest plot of association between acute kidney injury and mortality

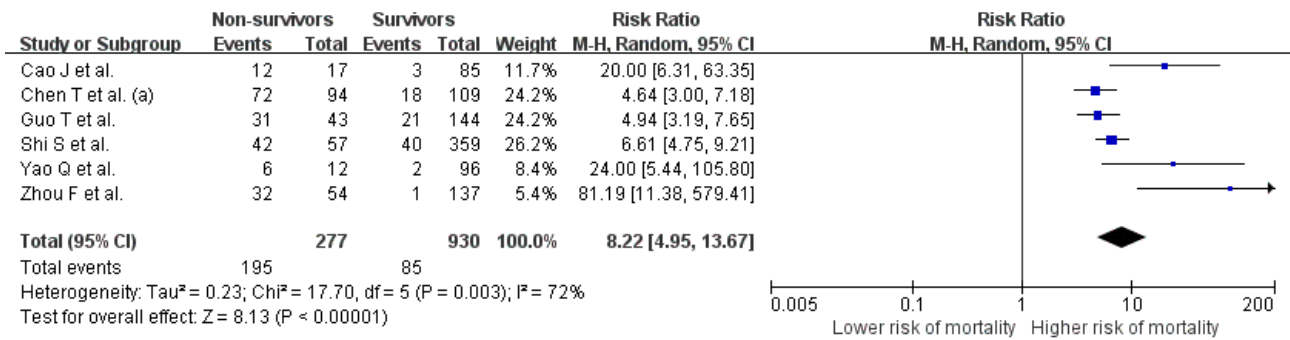

Figure S34. Forest plot of association between acute cardiac injury and mortality

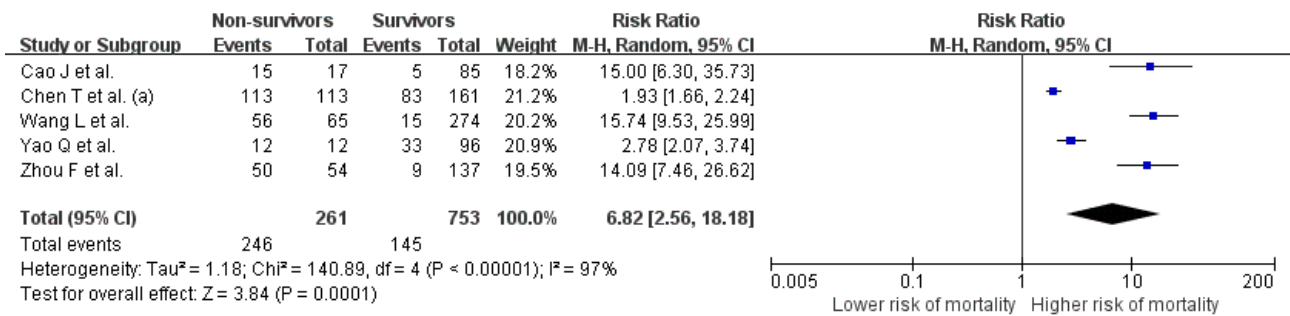

Figure S35. Forest plot of association between acute respiratory distress syndrome and mortality

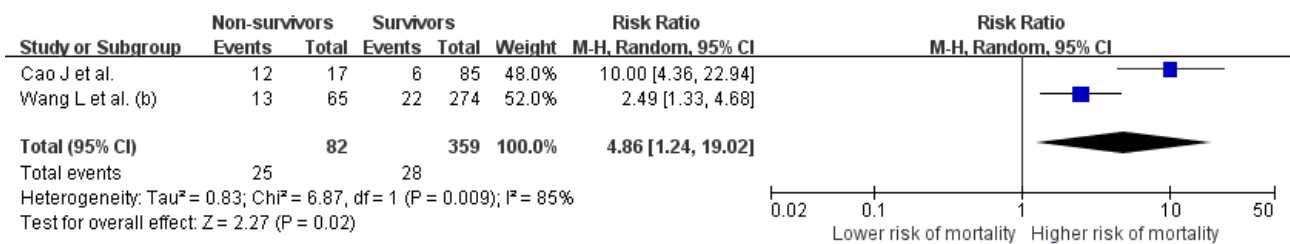

Figure S36. Forest plot of association between arrhythmia and mortality



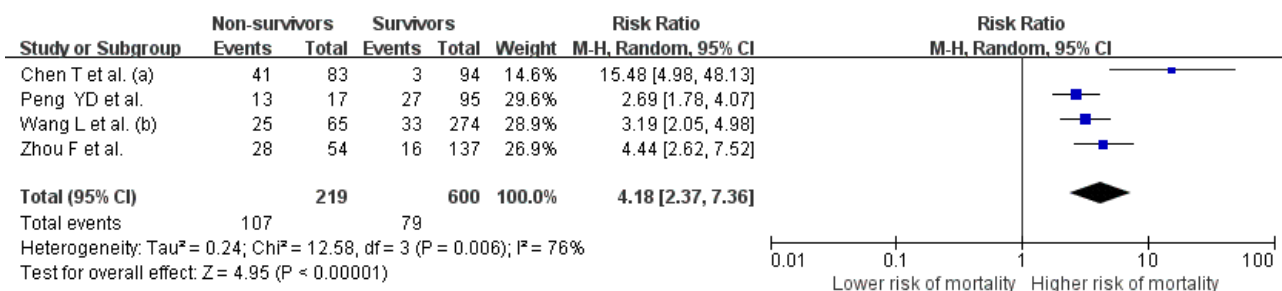

Figure S37. Forest plot of association between heart failure and mortality

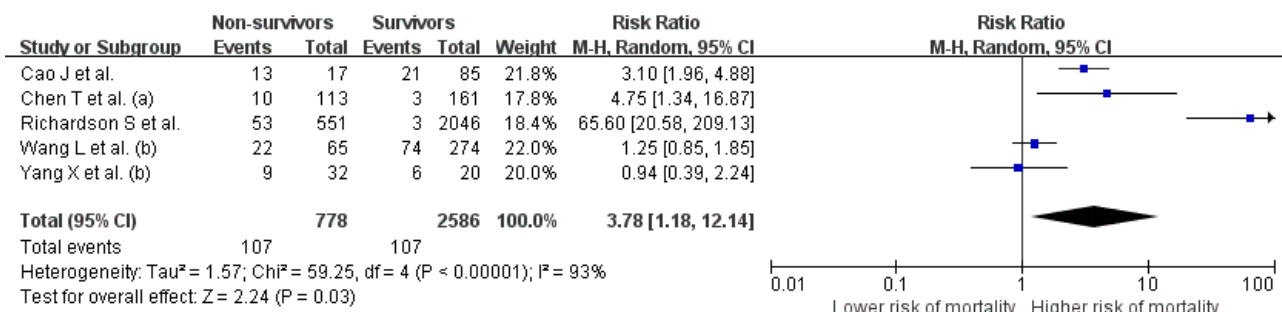

Figure S38. Forest plot of association between acute liver injury and mortality

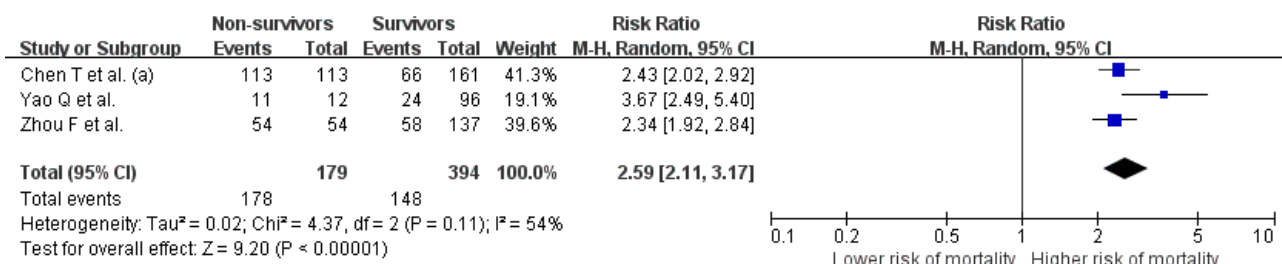

Figure S39. Forest plot of association between sepsis and mortality

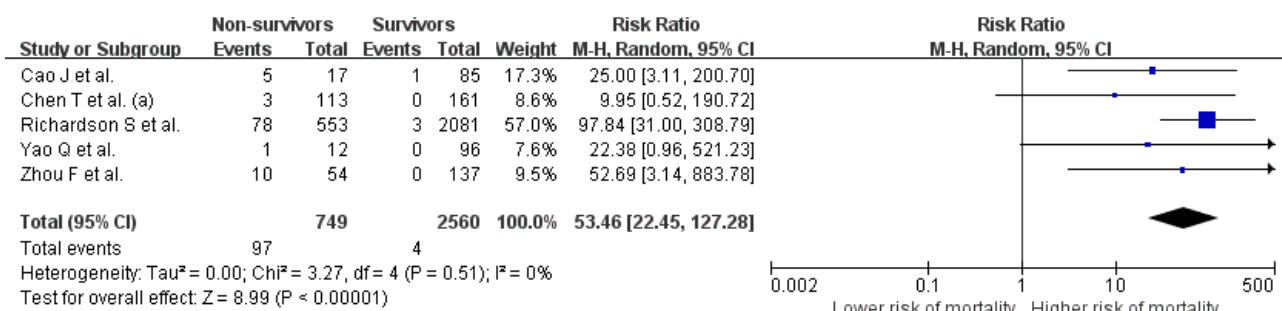

Figure S40. Forest plot of association between renal replacement therapy and mortality

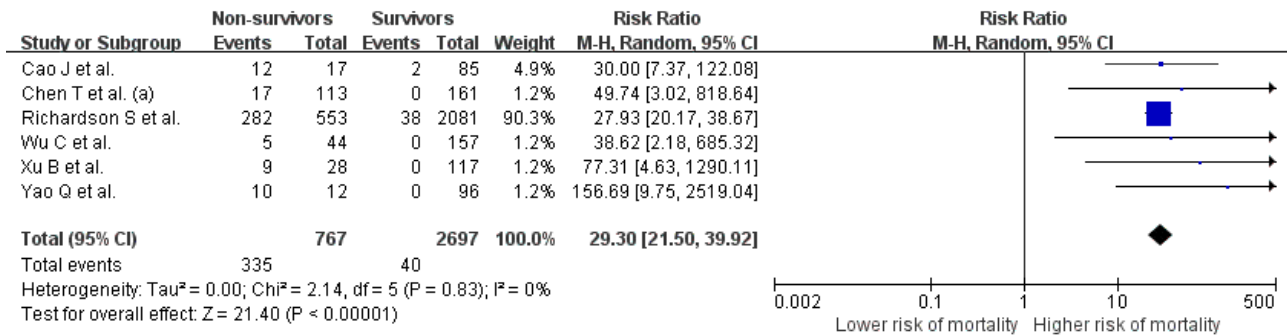

Figure S41. Forest plot of association between invasive mechanical ventilation and mortality

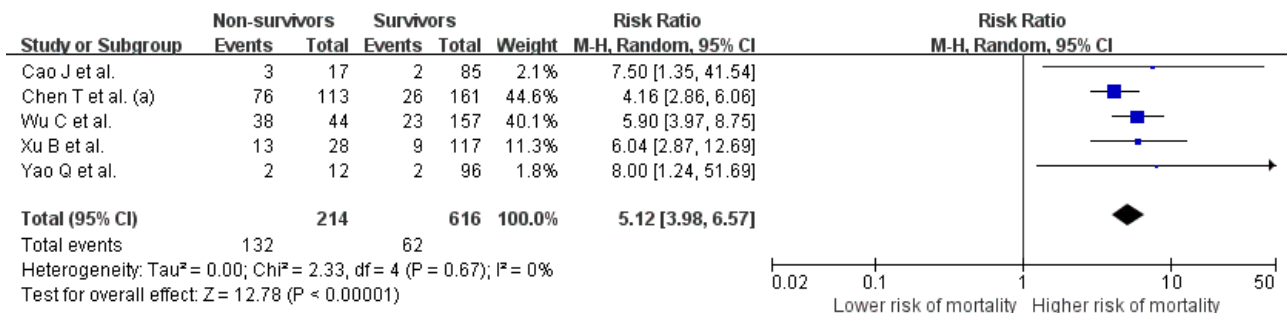

Figure S42. Forest plot of association between noninvasive ventilation and mortality

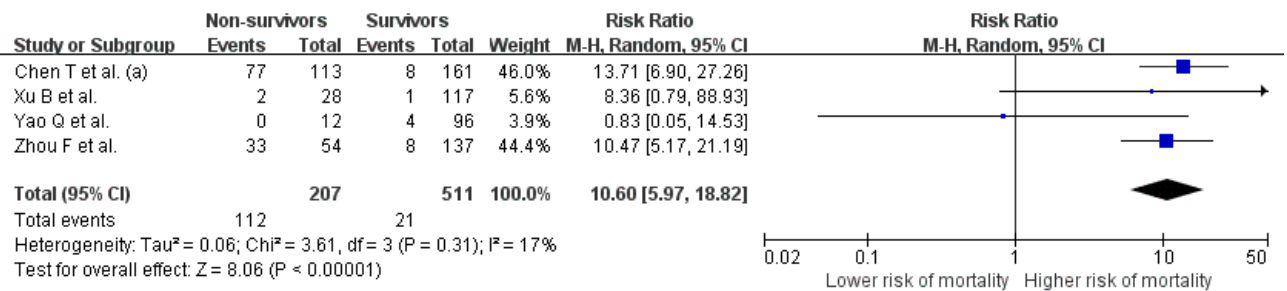

Figure S43. Forest plot of association between high flow nasal cannula and mortality

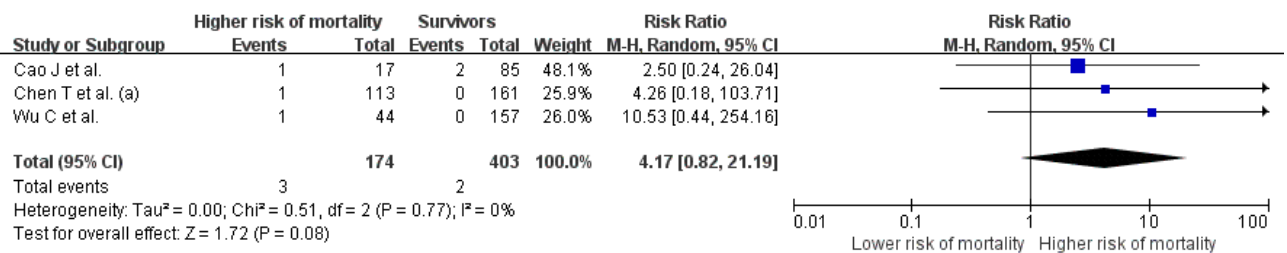

Figure S44. Forest plot of association between ECMO and mortality

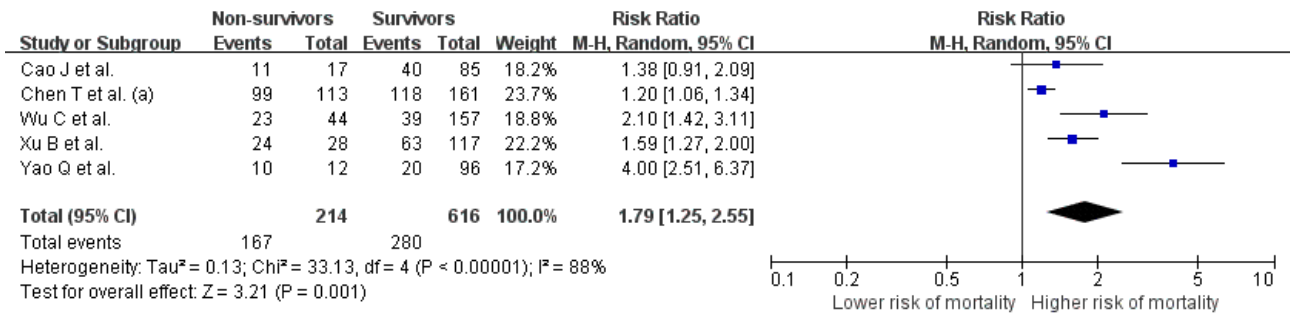

Figure S45. Forest plot of association between corticosteroid therapy and mortality

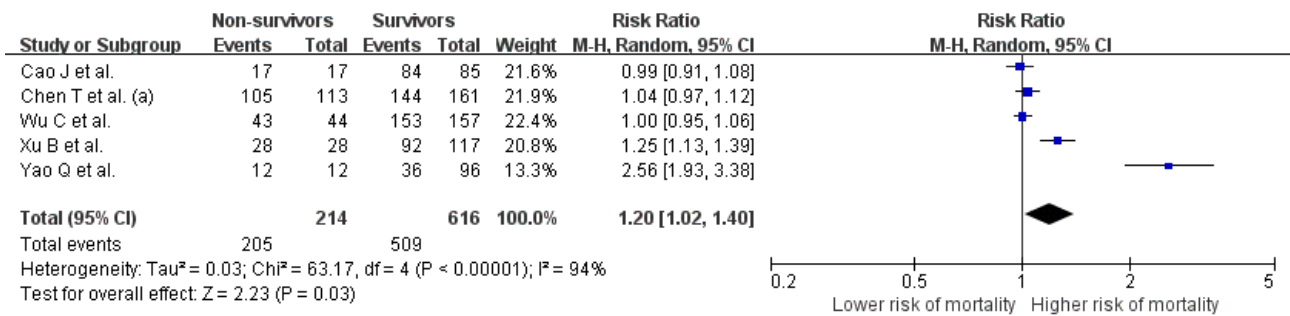

Figure S46. Forest plot of association between antibiotic therapy and mortality

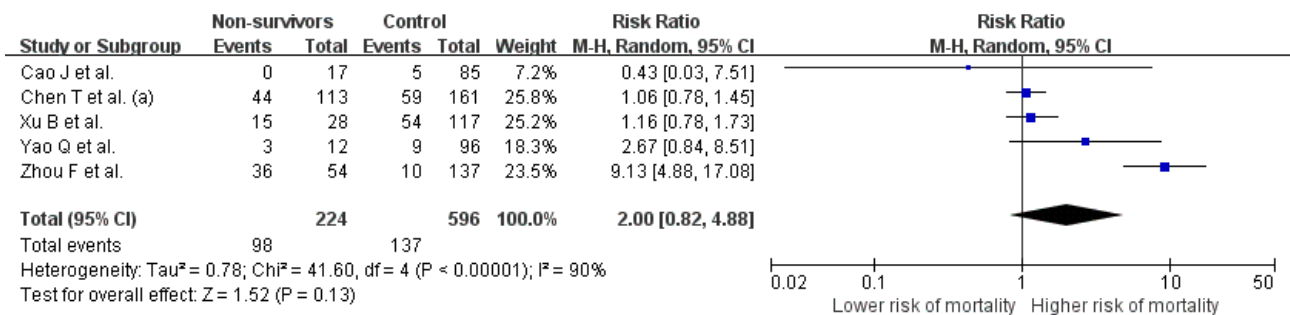

Figure S47. Forest plot of association between immunoglobulin therapy and mortality

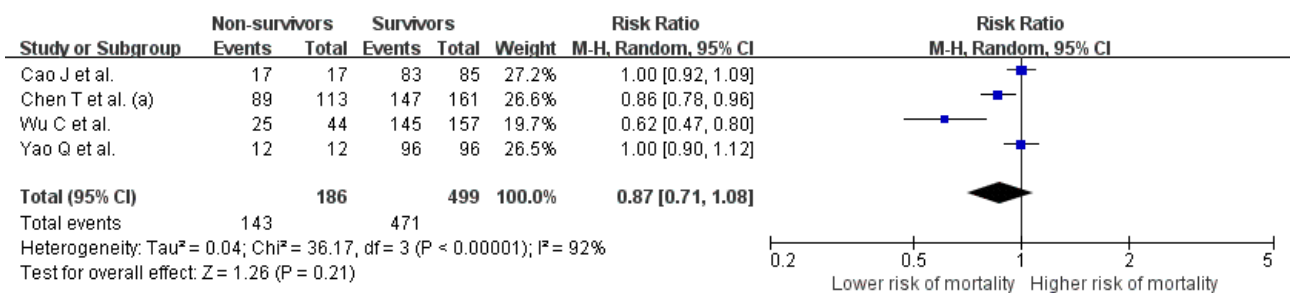

Figure S48. Forest plot of association between antiviral therapy and mortality

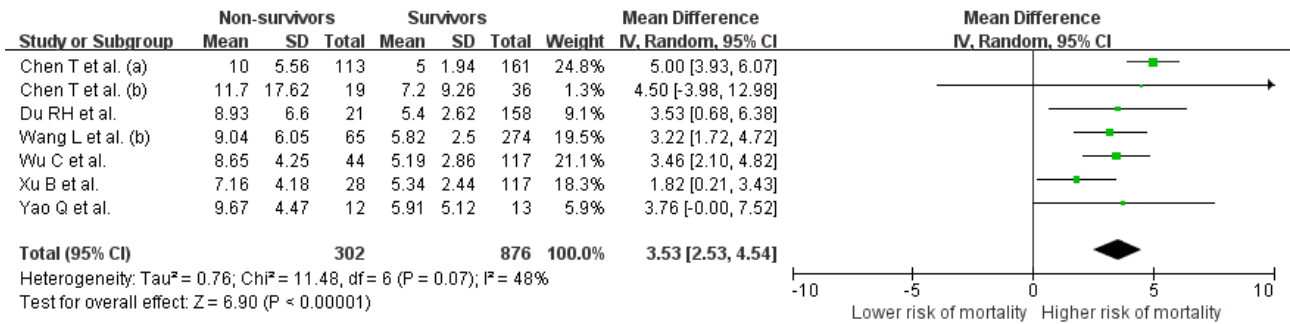

Figure S49. Forest plot of mean difference in white blood cell count between nonsurvivors and survivors

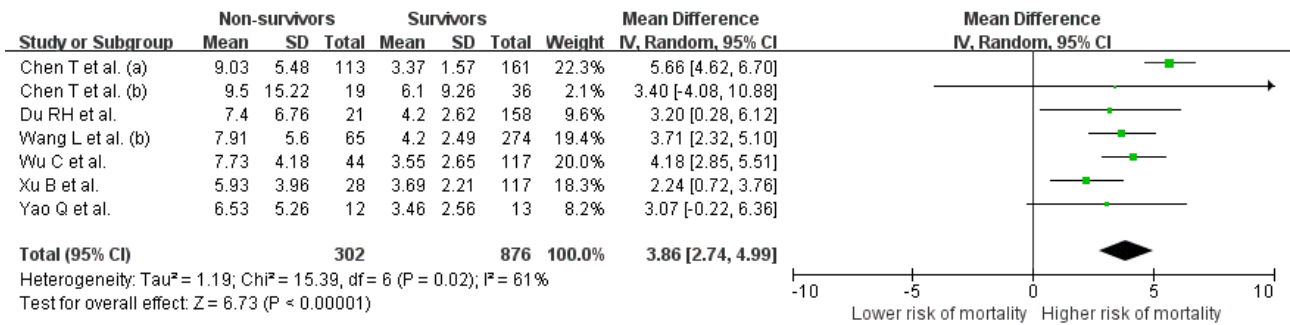

Figure S50. Forest plot of mean difference in neutrophil count between nonsurvivors and survivors

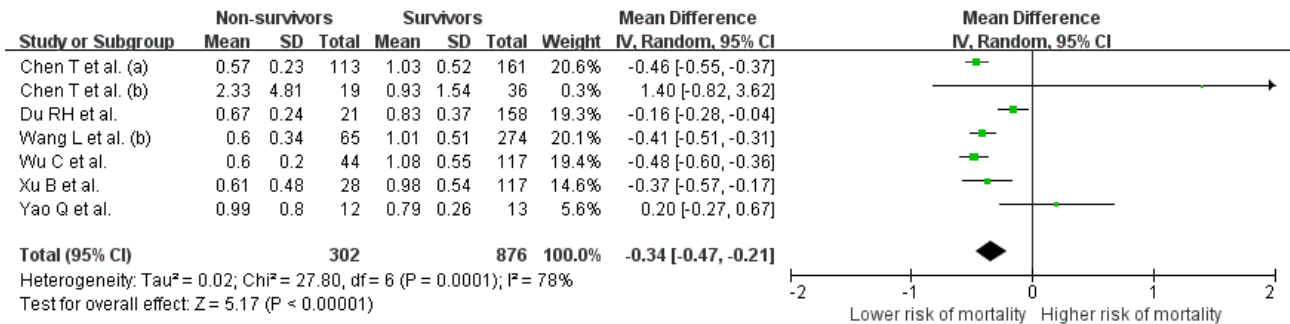

Figure S51. Forest plot of mean difference in lymphocyte count between nonsurvivors and survivors

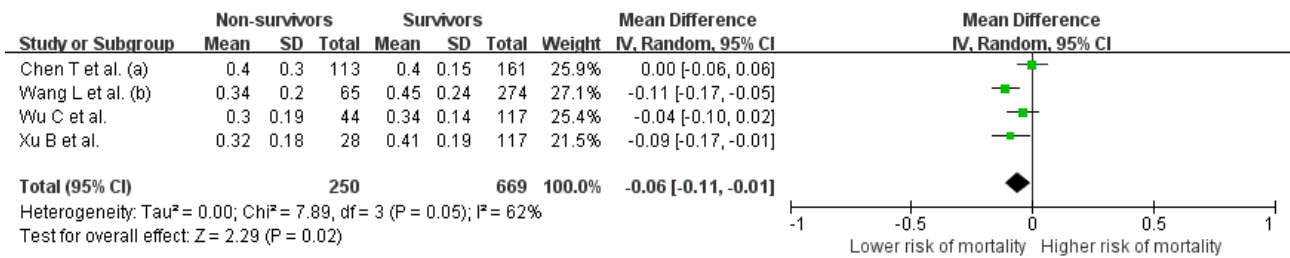

Figure S52. Forest plot of mean difference in monocyte count between nonsurvivors and survivors

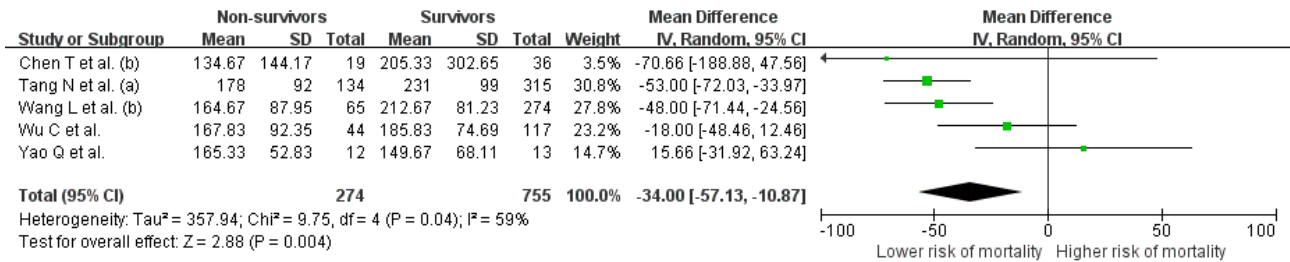

Figure S53. Forest plot of mean difference in platelet count between nonsurvivors and survivors

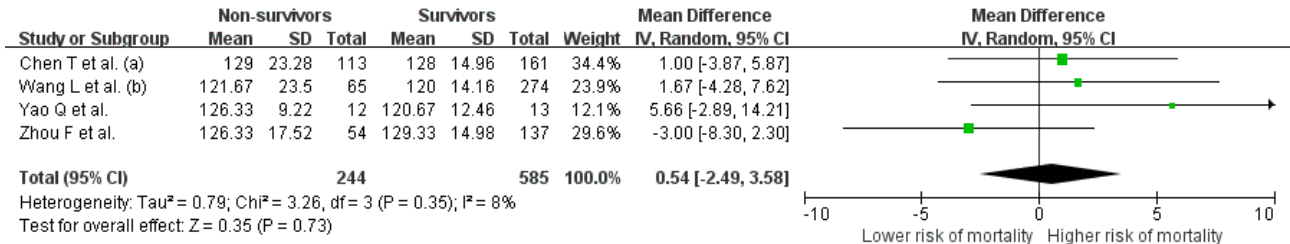

Figure S54. Forest plot of mean difference in hemoglobin between nonsurvivors and survivors

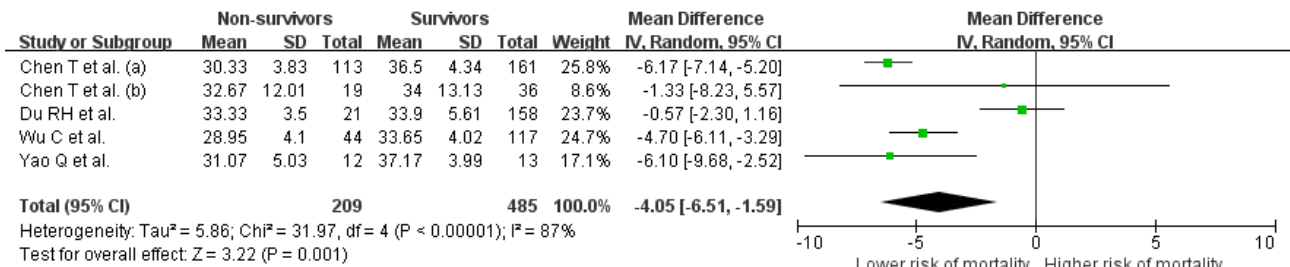

Figure S55. Forest plot of mean difference in albumin between nonsurvivors and survivors

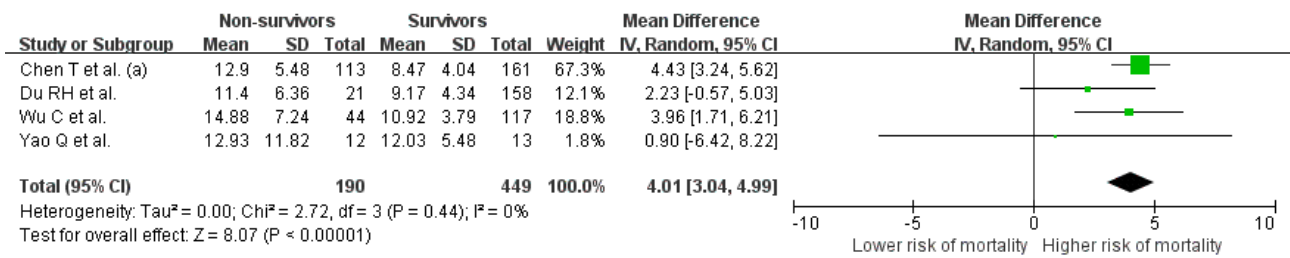

Figure S56. Forest plot of mean difference in total bilirubin between nonsurvivors and survivors

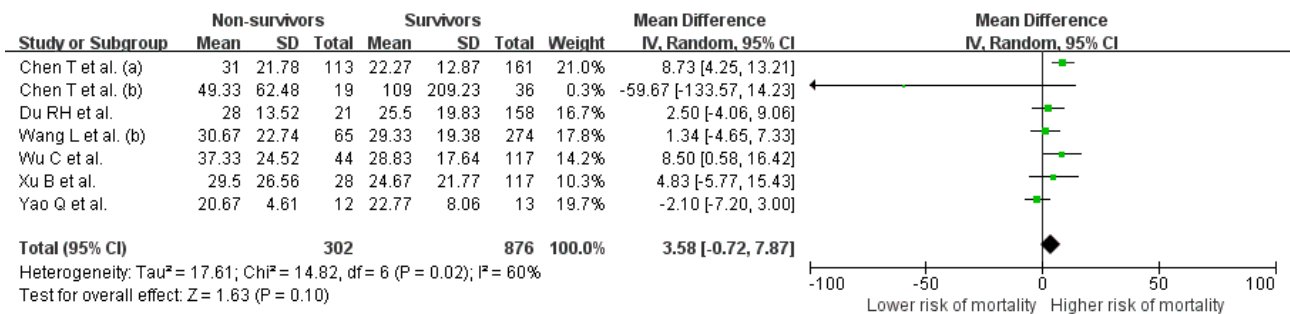

Figure S57. Forest plot of mean difference in ALT between nonsurvivors and survivors

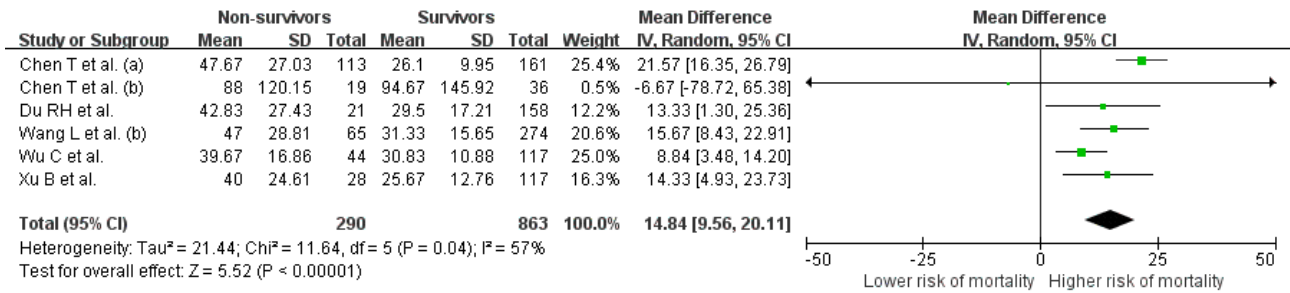

Figure S58. Forest plot of mean difference in AST between nonsurvivors and survivors

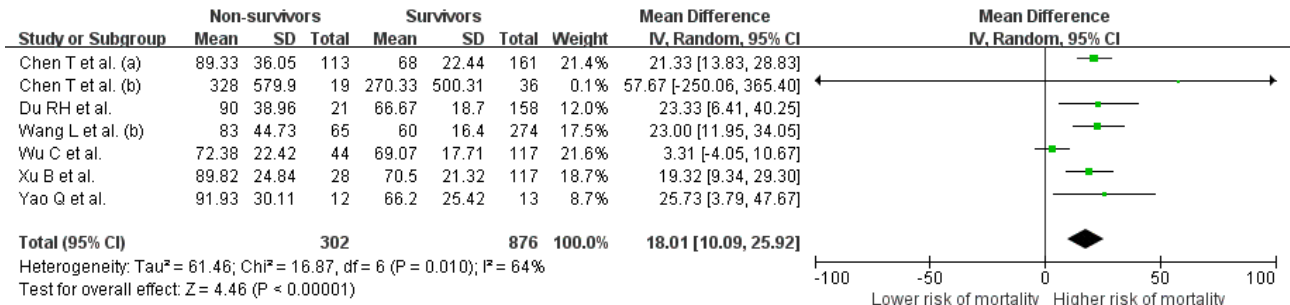

Figure S59. Forest plot of mean difference in creatinine between nonsurvivors and survivors

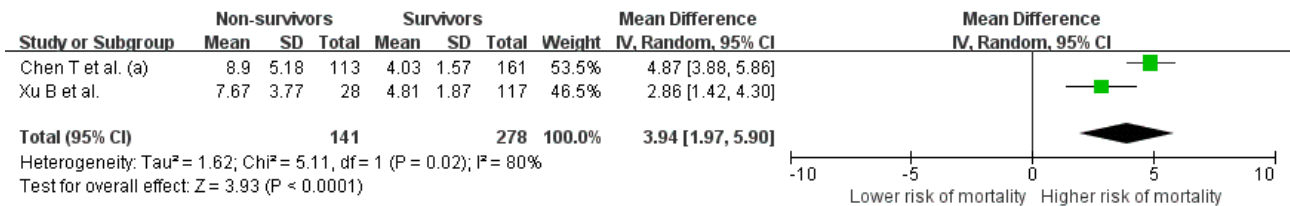

Figure S60. Forest plot of mean difference in blood urea nitrogen between nonsurvivors and survivors

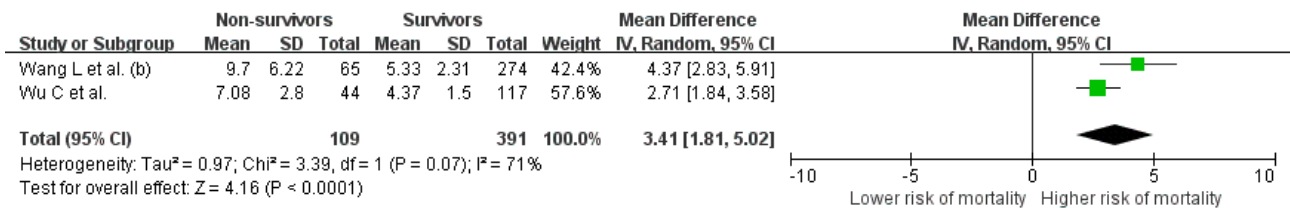

Figure S61. Forest plot of mean difference in urea between nonsurvivors and survivors

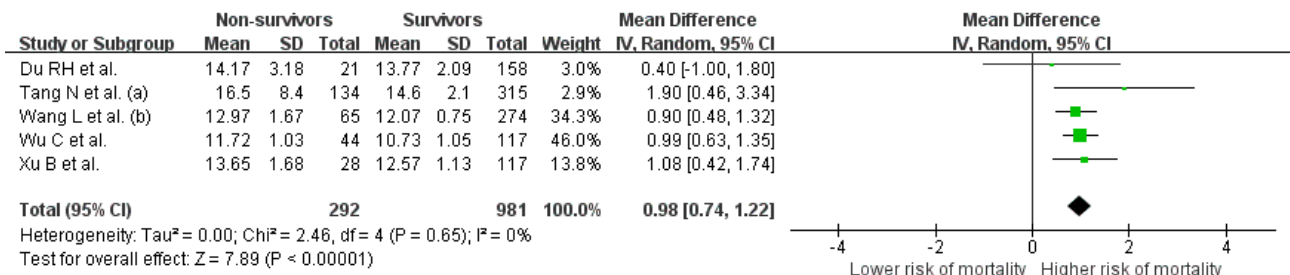

Figure S62. Forest plot of mean difference in prothrombin time between nonsurvivors and survivors

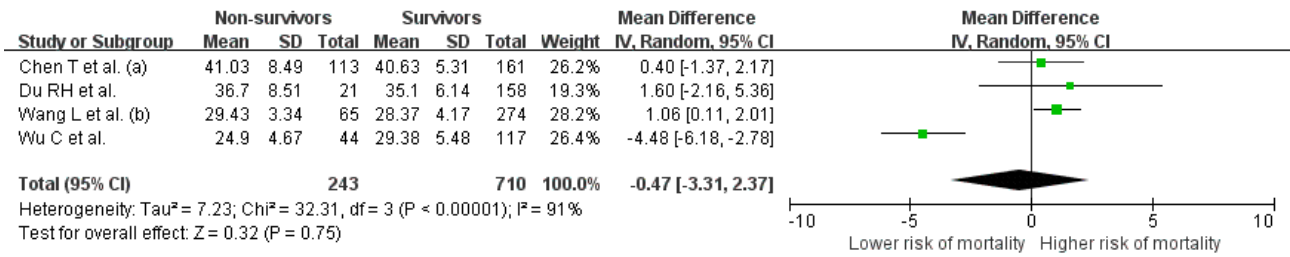

Figure S63. Forest plot of mean difference in APTT between nonsurvivors and survivors

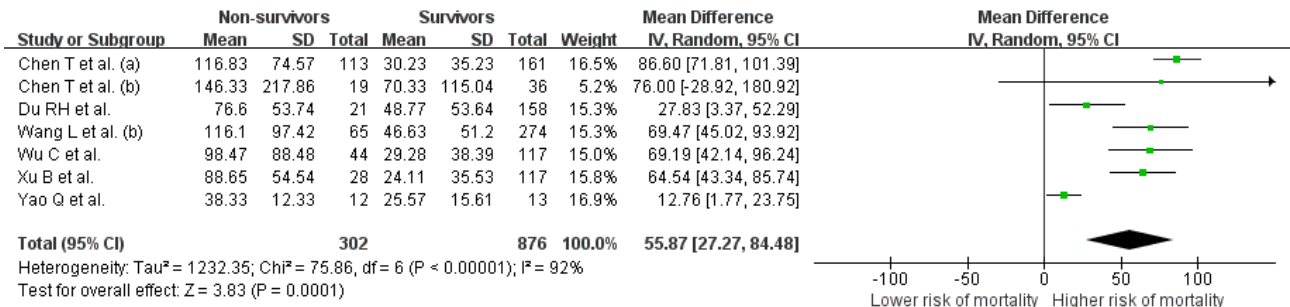

Figure S64. Forest plot of mean difference in C-reactive protein between nonsurvivors and survivors

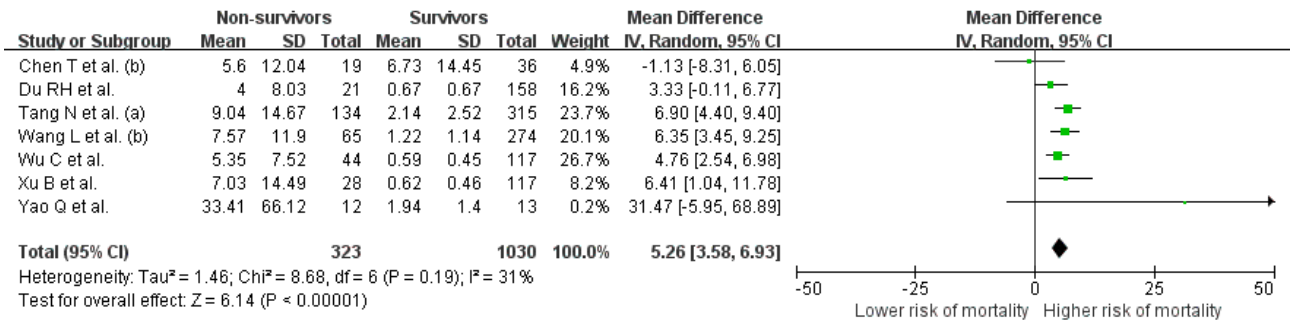

Figure S65. Forest plot of mean difference in D-dimer between nonsurvivors and survivors

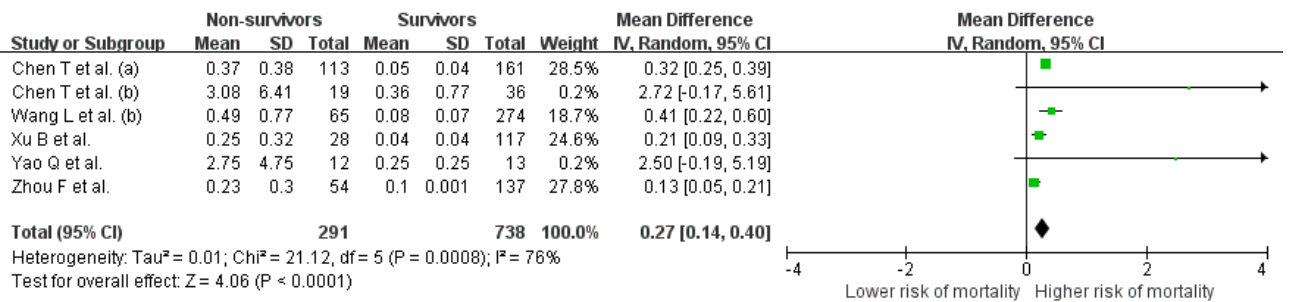

Figure S66. Forest plot of mean difference in procalcitonin between nonsurvivors and survivors

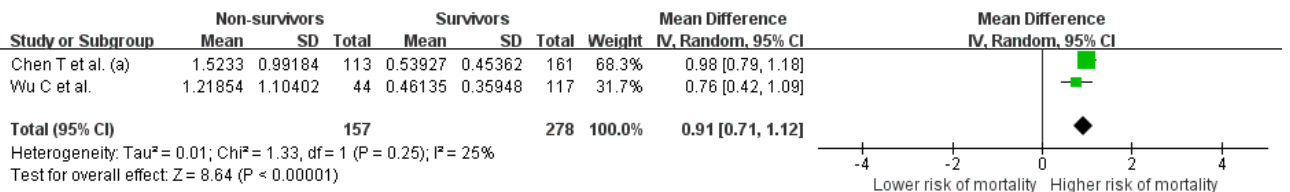

Figure S67. Forest plot of mean difference in ferritin between nonsurvivors and survivors



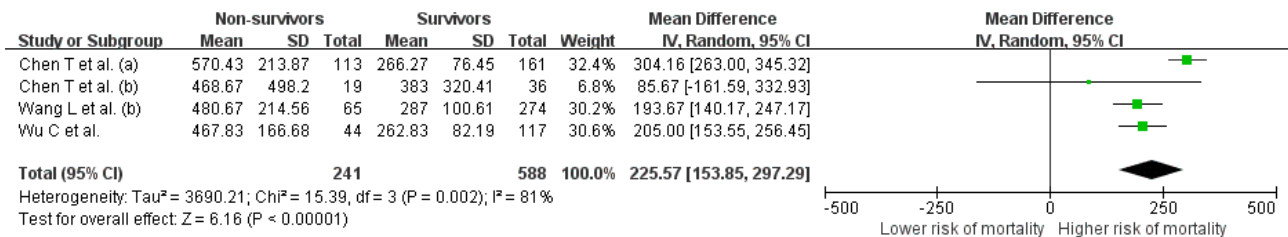

Figure S68. Forest plot of mean difference in lactate dehydrogenase between nonsurvivors and survivors

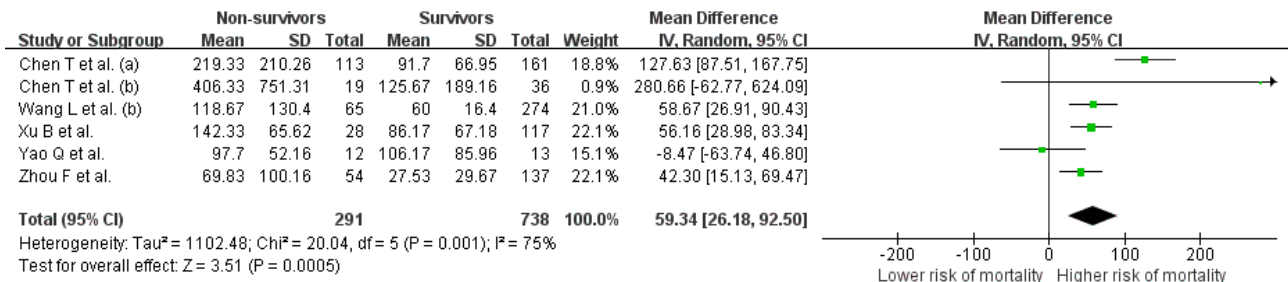

Figure S69. Forest plot of mean difference in creatine kinase between nonsurvivors and survivors

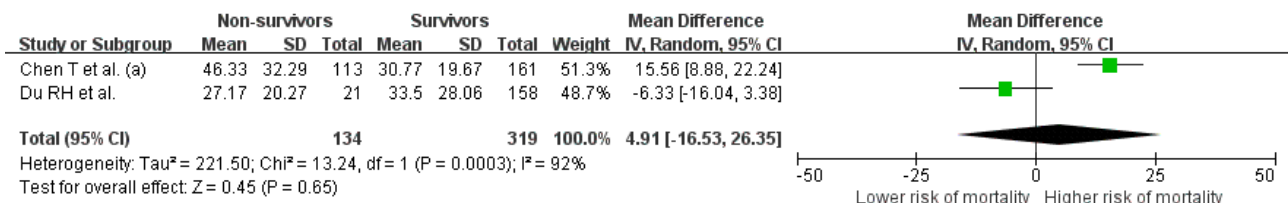

Figure S70. Forest plot of mean difference in gamma-glutamyl transpeptidase between nonsurvivors and survivors

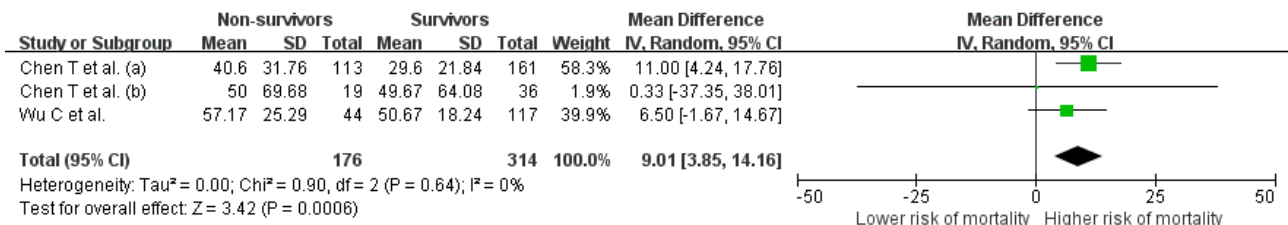

Figure S71. Forest plot of mean difference in ESR between nonsurvivors and survivors

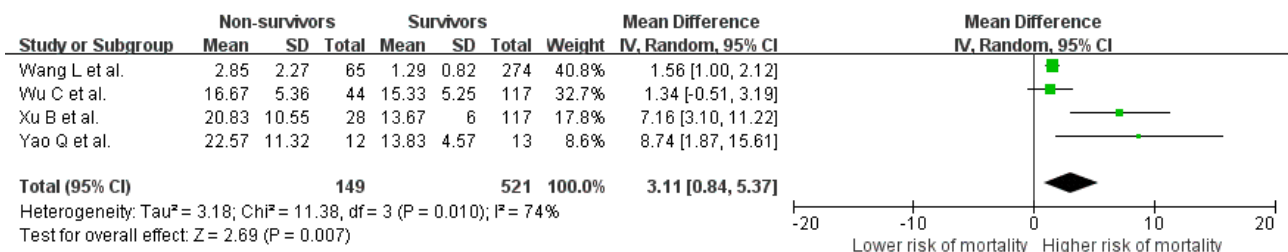

Figure S72. Forest plot of mean difference in creatine kinase-MB between nonsurvivors and survivors



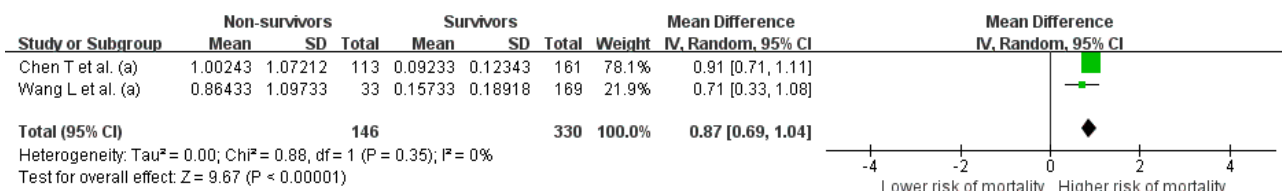

Figure S73. Forest plot of mean difference in NT-proBNP between nonsurvivors and survivors

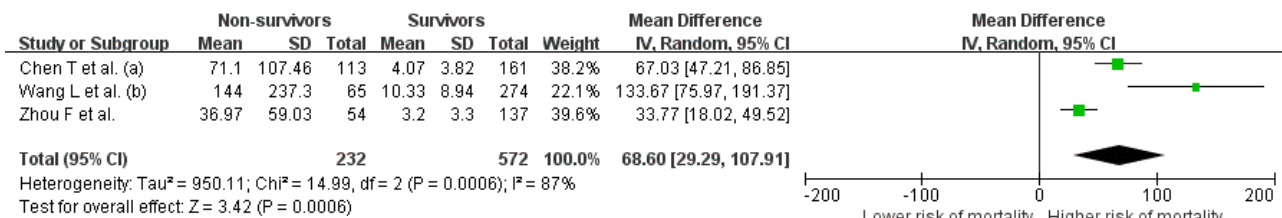

Figure S74. Forest plot of mean difference in hs-cTnI between nonsurvivors and survivors

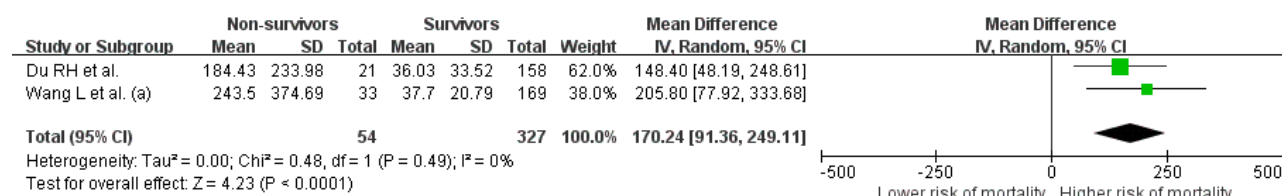

Figure S75. Forest plot of mean difference in myoglobin between nonsurvivors and survivors

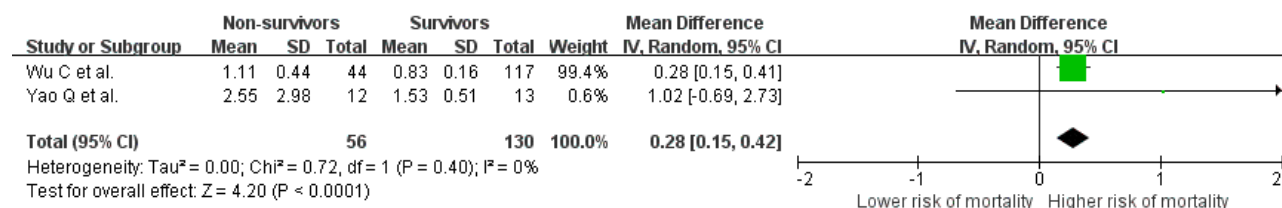

Figure S76. Forest plot of mean difference in cystatin C between nonsurvivors and survivors

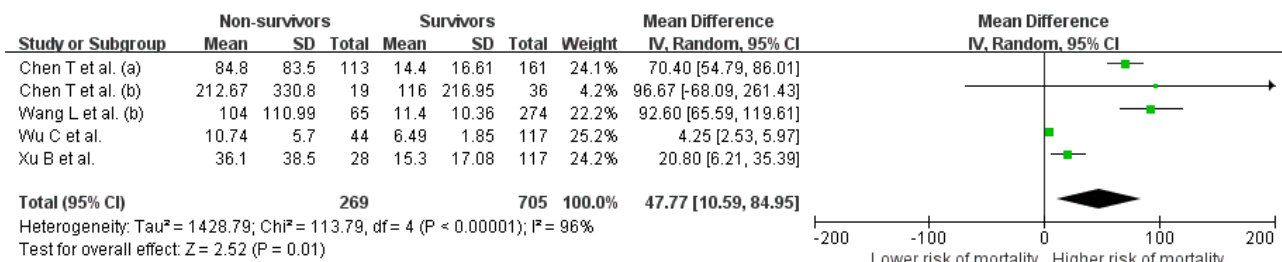

Figure S77. Forest plot of mean difference in interleukin-6 between nonsurvivors and survivors

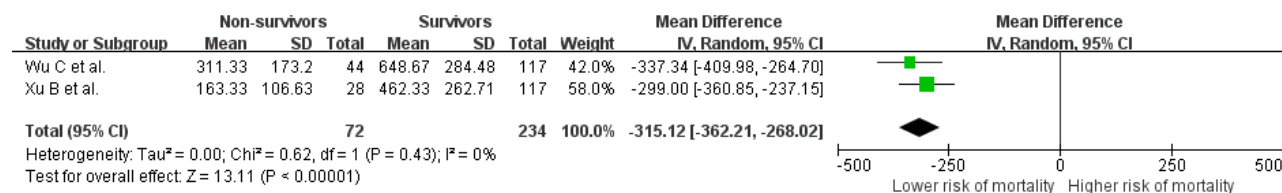

Figure S78. Forest plot of mean difference in CD3+ cell count between nonsurvivors and survivors

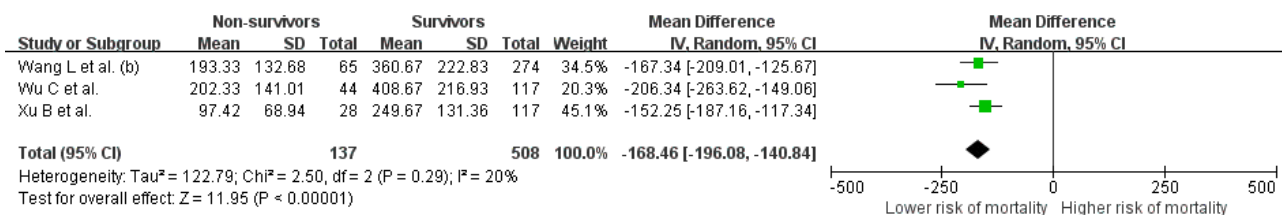

Figure S79. Forest plot of mean difference in CD4+ cell count between nonsurvivors and survivors

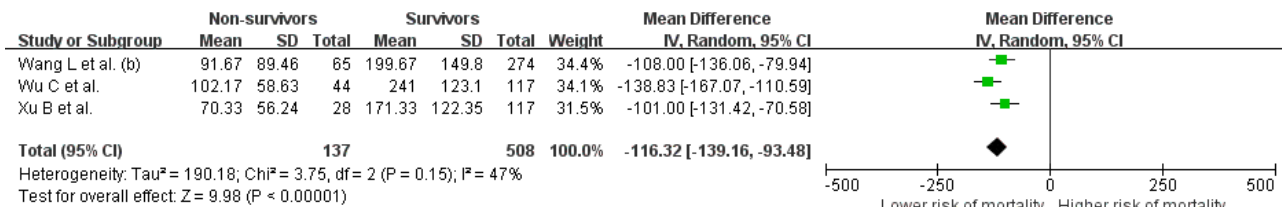

Figure S80. Forest plot of mean difference in CD8+ cell count between nonsurvivors and survivors

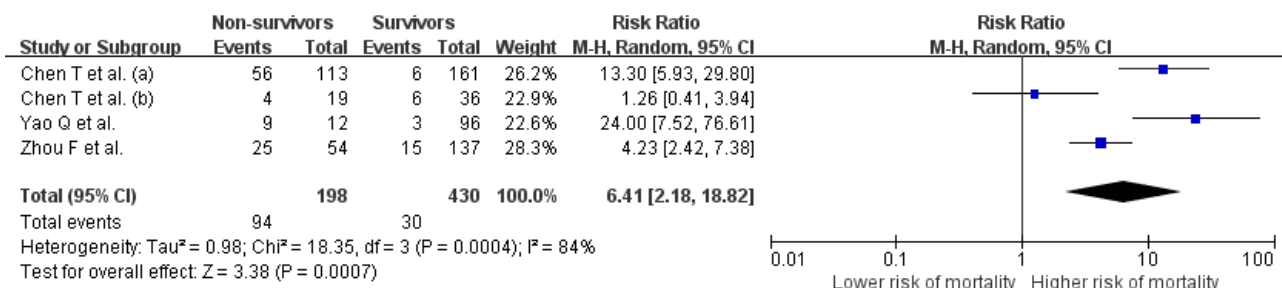

Figure S81. Forest plot of association between increased white blood cell count ( $\geq 10 \times 10^9/L$ ) and mortality

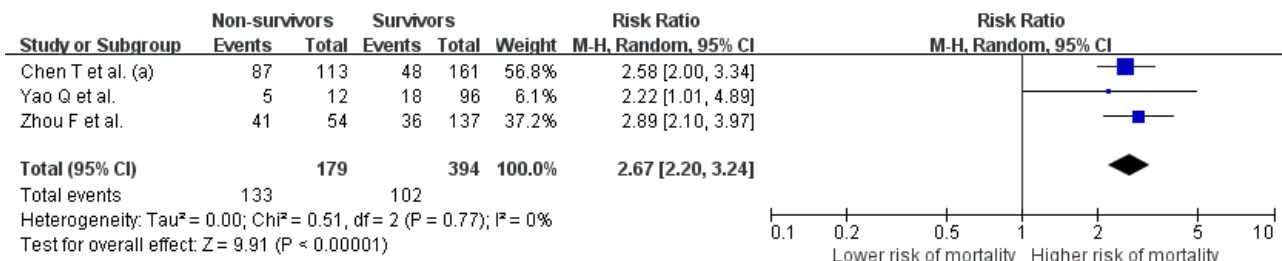

Figure S82. Forest plot of association between decreased lymphocyte count ( $< 0.8 \times 10^9/L$ ) and mortality

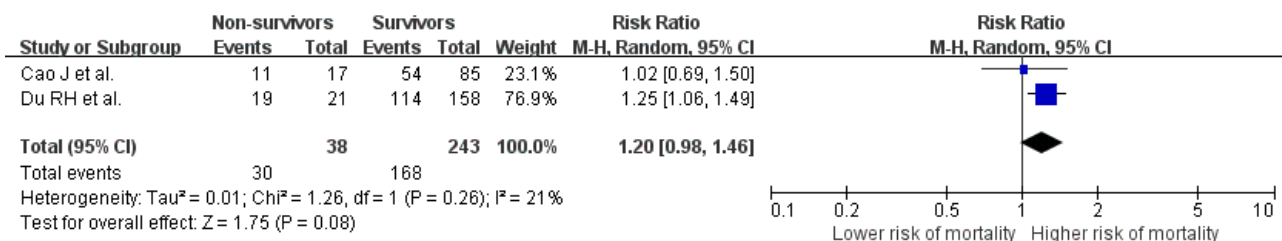

Figure S83. Forest plot of association between decreased lymphocyte count ( $< 1.1 \times 10^9/L$ ) and mortality

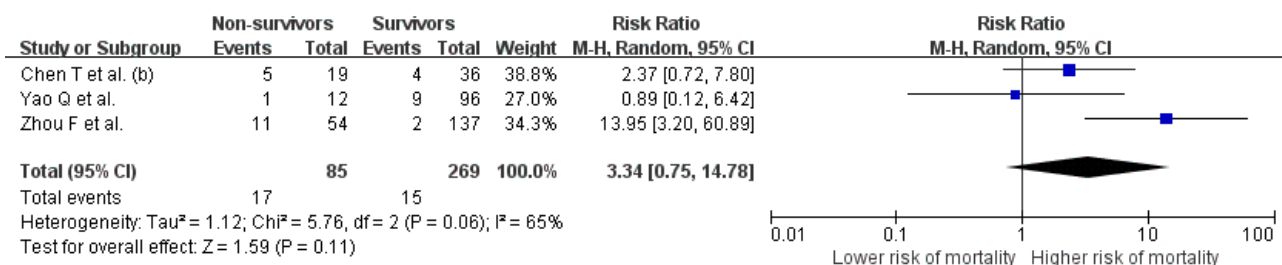

Figure S84. Forest plot of association between decreased platelet count (<100 × 10<sup>9</sup>/L) and mortality

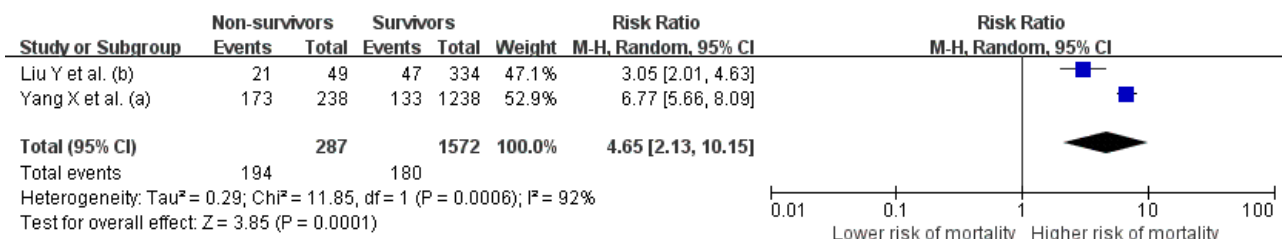

Figure S85. Forest plot of association between decreased platelet count (<125 × 10<sup>9</sup>/L) and mortality

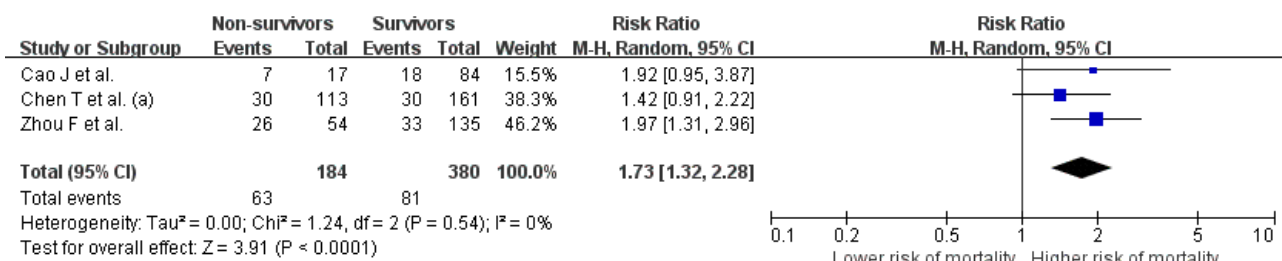

Figure S86. Forest plot of association between increased ALT (>40 U/L) and mortality

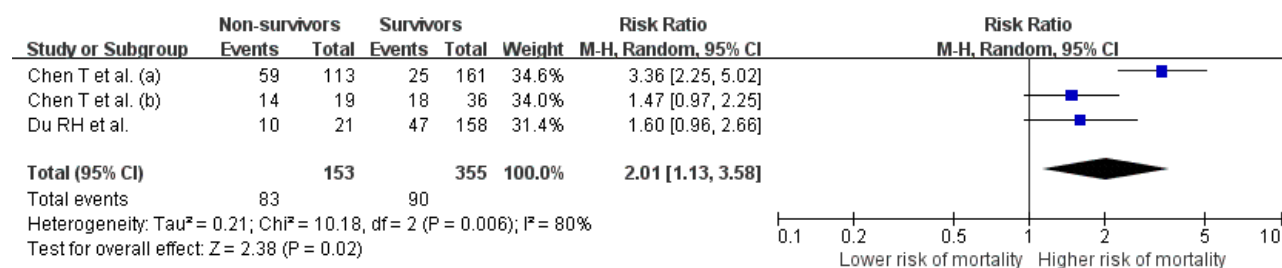

Figure S87. Forest plot of association between increased AST (>40 U/L) and mortality

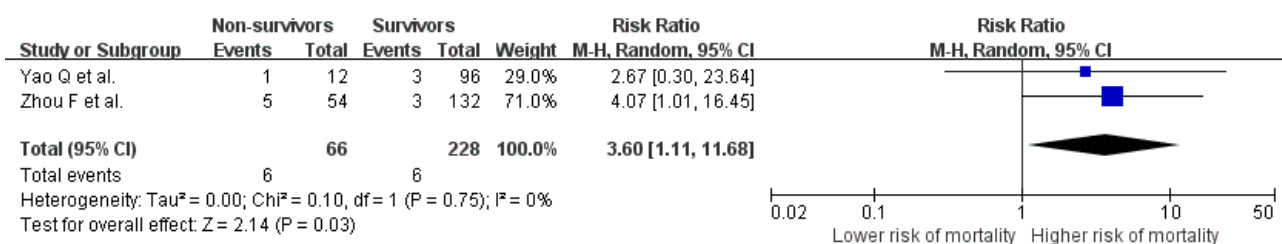

Figure S88. Forest plot of association between increased creatinine (>133 μmol/L) and mortality

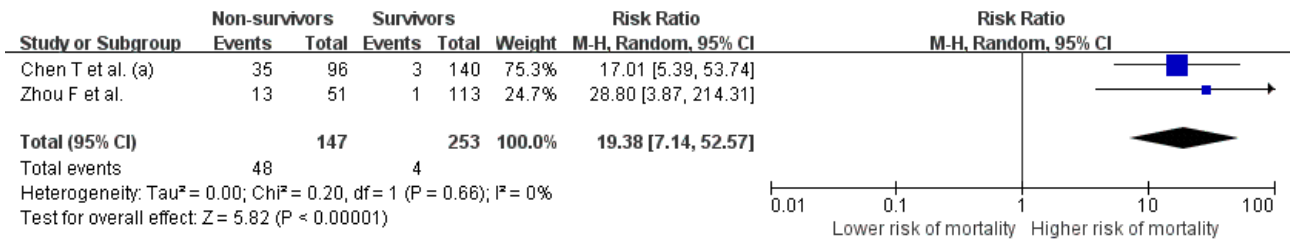

Figure S89. Forest plot of association between increased procalcitonin ( $\geq 0.5$  ng/mL) and mortality

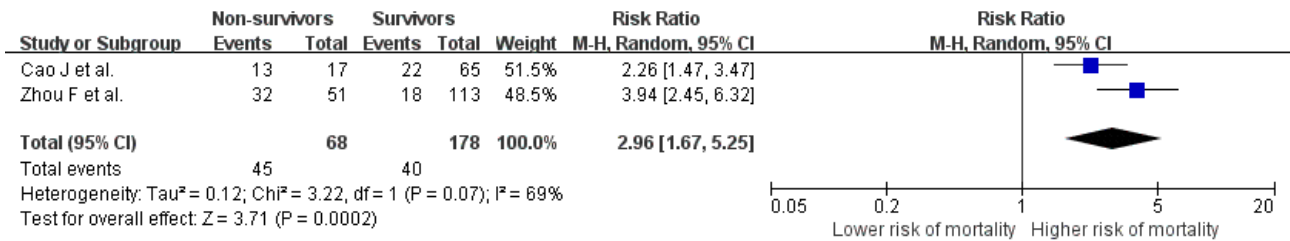

Figure S90. Forest plot of association between increased procalcitonin ( $\geq 0.1$  ng/mL) and mortality

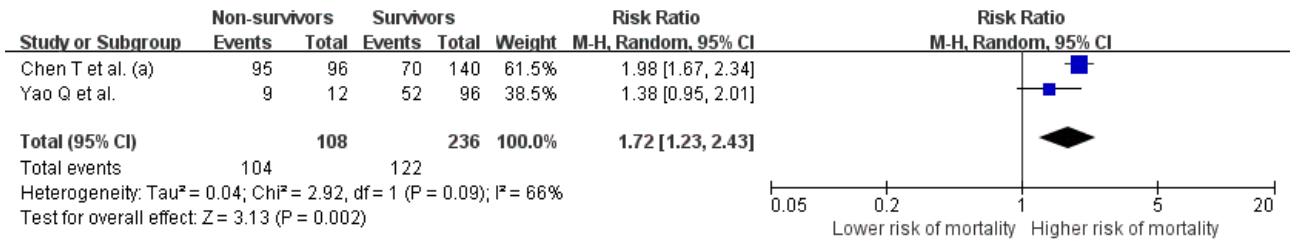

Figure S91. Forest plot of association between increased procalcitonin ( $\geq 0.05$  ng/mL) and mortality

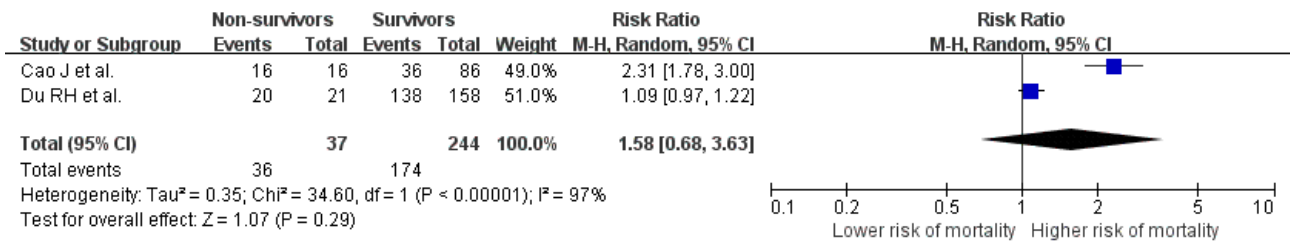

Figure S92. Forest plot of association between increased C-reactive protein ( $\geq 10$  mg/L) and mortality

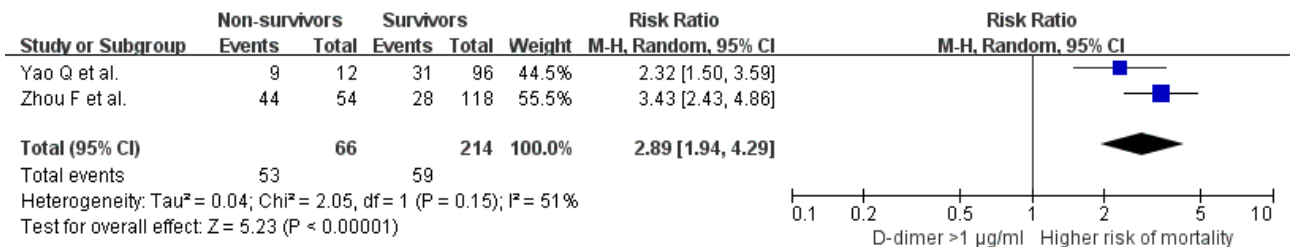

Figure S93. Forest plot of association between increased D-dimer ( $> 1.0$   $\mu\text{g/mL}$ ) and mortality

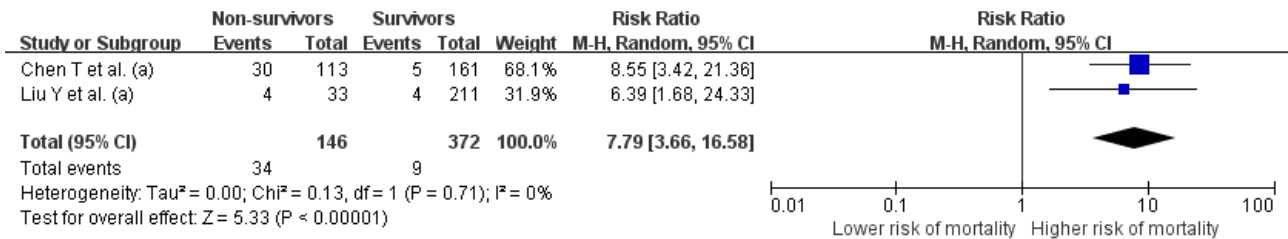

Figure S94. Forest plot of association between respiratory rate  $\geq 30$  breaths per min and mortality

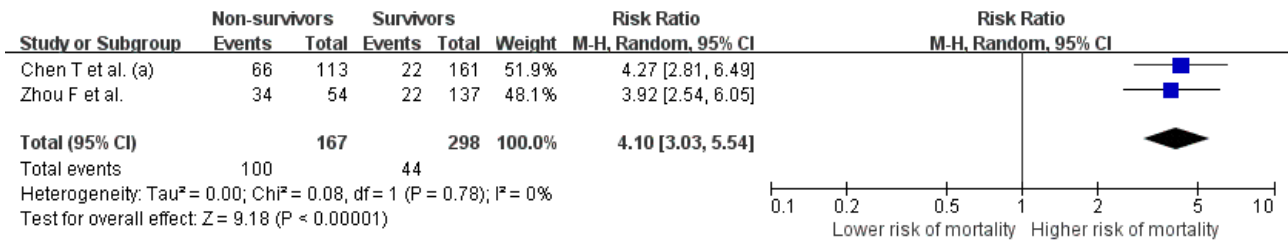

Figure S95. Forest plot of association between respiratory rate  $\geq 24$  breaths per min and mortality

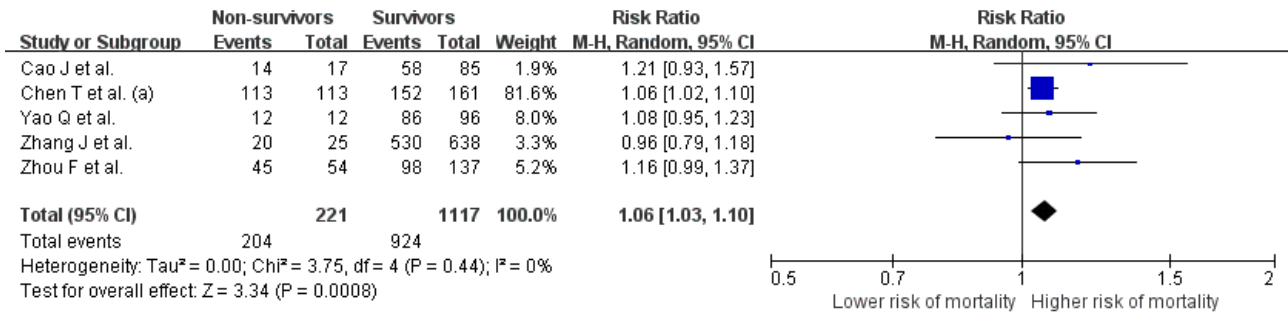

Figure S96. Forest plot of association between bilateral pneumonia and mortality

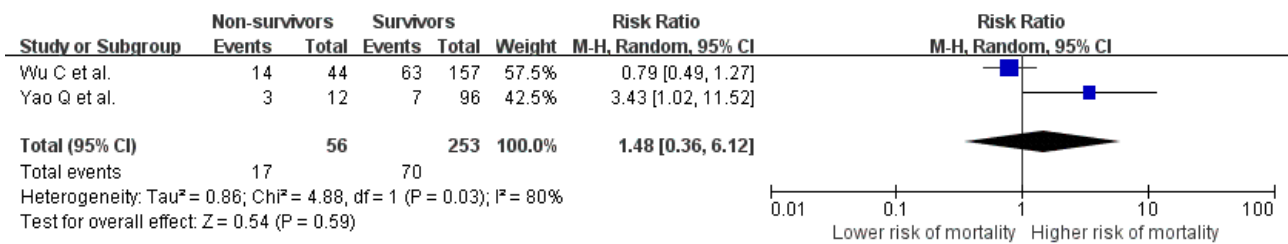

Figure S97. Forest plot of association between highest temperature  $\geq 39$  °C and mortality

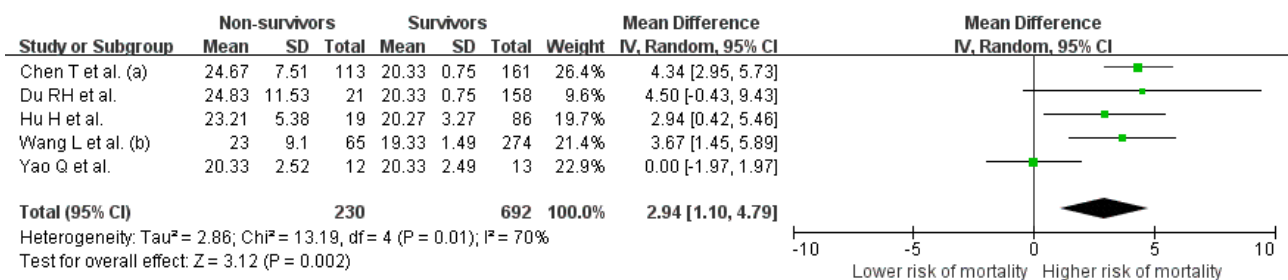

Figure S98. Forest plot of mean difference in respiratory rate between nonsurvivors and survivors

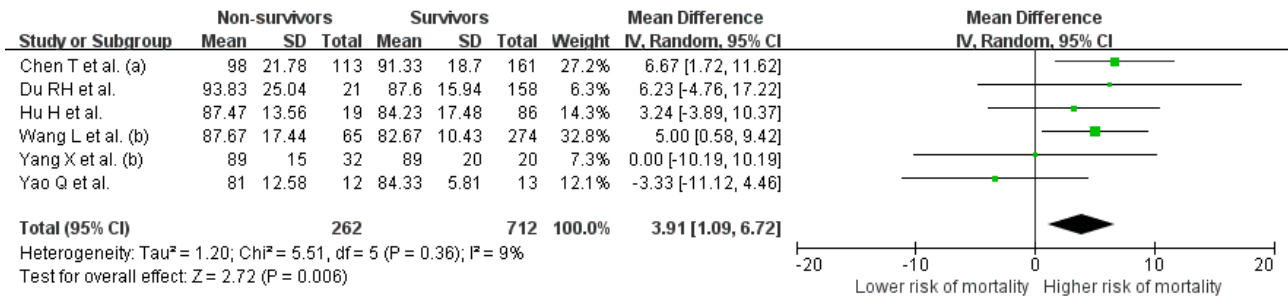

Figure S99. Forest plot of mean difference in heart rate between nonsurvivors and survivors

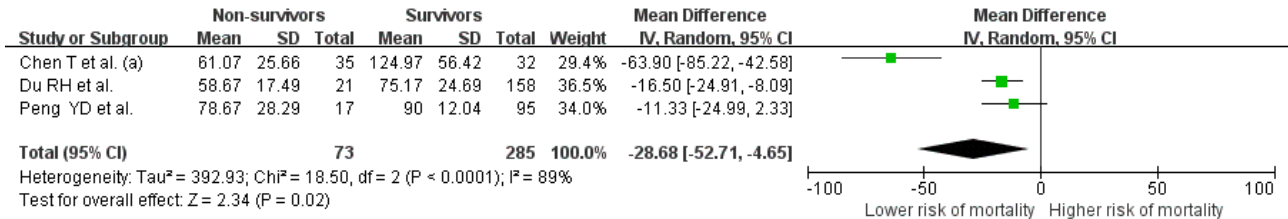

Figure S100. Forest plot of mean difference in PaO<sub>2</sub> between nonsurvivors and survivors

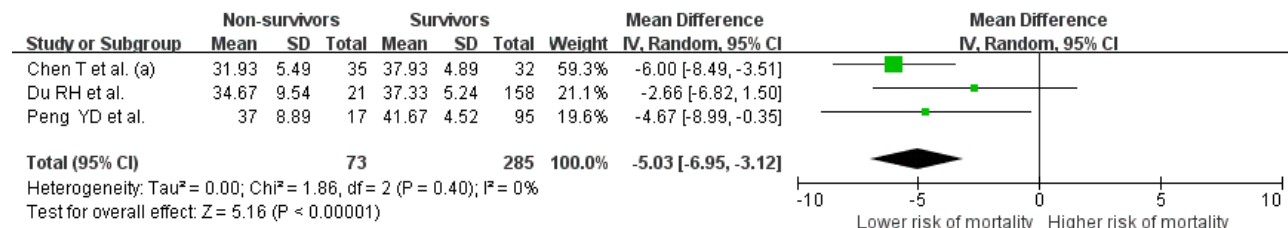

Figure S101. Forest plot of mean difference in PaCO<sub>2</sub> between nonsurvivors and survivors

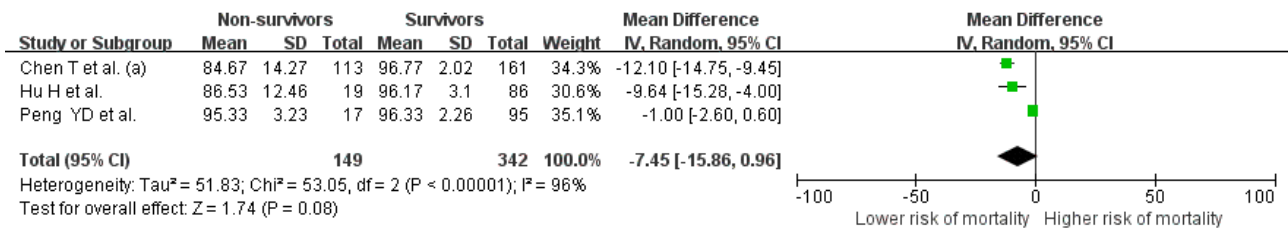

Figure S102. Forest plot of mean difference in SpO<sub>2</sub> between nonsurvivors and survivors

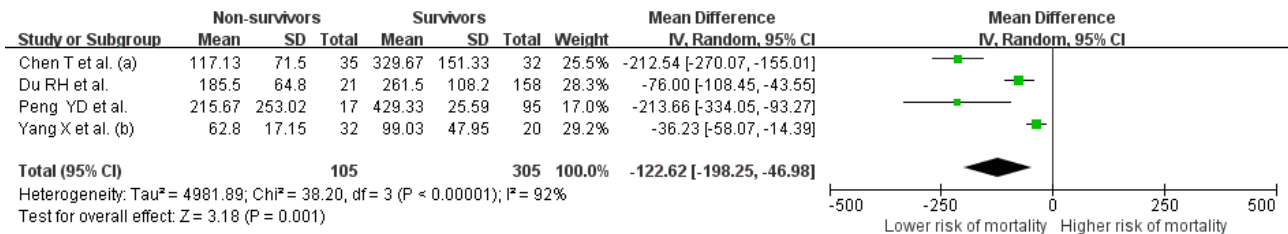

Figure S103. Forest plot of mean difference in PaO<sub>2</sub>/FiO<sub>2</sub> between nonsurvivors and survivors

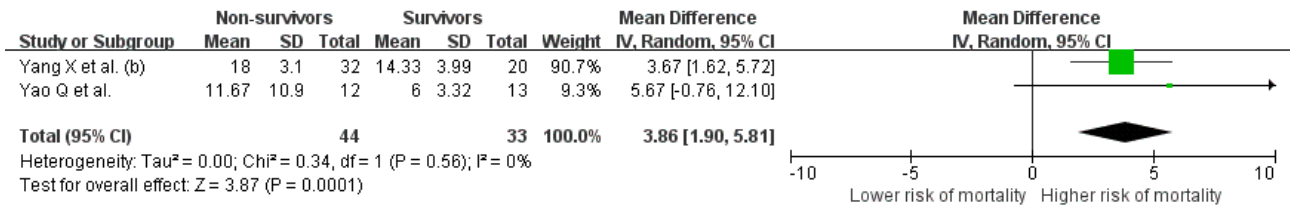

Figure S104. Forest plot of mean difference in APACHE II score between nonsurvivors and survivors

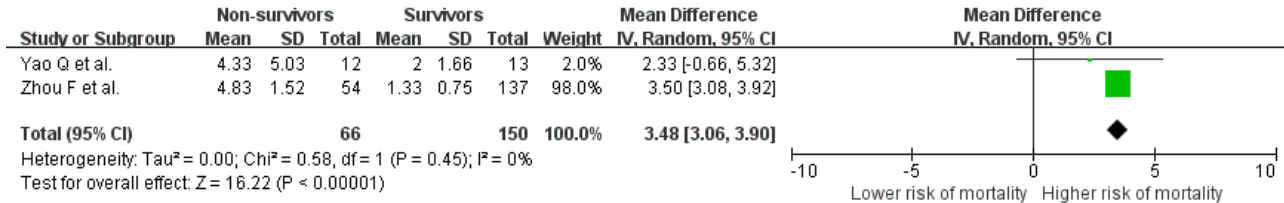

Figure S105. Forest plot of mean difference in SOFA score between nonsurvivors and survivors

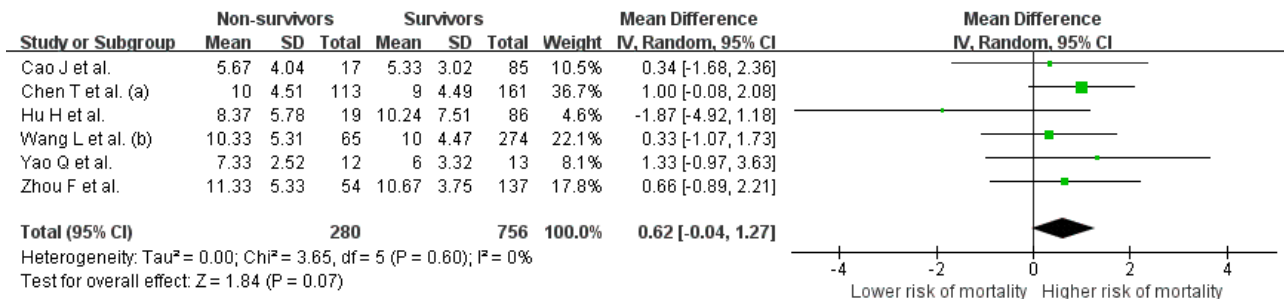

Figure S106. Forest plot of mean difference in Time from illness onset to hospital admission between nonsurvivors and survivors
